# Supplementary material for: The effect of resonance-assisted hydrogen bond on the second-order nonlinear optical properties of pyridine hydrazone photoswitches: a quantum chemistry investigation
Source: Royal Society of Chemistry journal article supplement (doi:10.1039/d3nj02848h), 2023-01-01
Supplement: d3nj02848h1.pdf [file d3nj02848h1.pdf]

## Supporting Information for:

### **The Effect of Resonance-Assisted Hydrogen Bond on the Second-Order Nonlinear Optical properties of Pyridine Hydrazone Photoswitches : A Quantum Chemistry Investigation**

Douniazed Hannachi\*<sup>a, b</sup>, Nouredine Khelfaoui<sup>a</sup>, Meriem Zaidi<sup>a, c</sup>, Diha Yahiaoui<sup>a</sup>, Salima Lakehal<sup>d</sup>, Christophe Morell<sup>e</sup>, Henry Chermette\*<sup>e</sup>

<sup>a</sup>Laboratoire d'Électrochimie, d'Ingénierie Moléculaire et de Catalyse Redox (LEIMCR), Département d'Enseignement de Base en Technologie, Faculté de Technologie, Université Ferhat Abbas, Sétif-1, Algérie.

<sup>b</sup>Département de Chimie, Faculté des Sciences, Université Ferhat Abbas, Setif-1, Algérie.

<sup>c</sup>Laboratoire de Chimie, Ingénierie Moléculaire et Nanostructures (LCIMN), Université Ferhat Abbas Sétif 1, Sétif 19000, Algérie.

<sup>d</sup>Institut des Science de la Terre et de l'Univers, Université de Batna-2, Algérie.

<sup>e</sup>Université de Lyon, Université Claude Bernard Lyon 1, Institut des Sciences Analytiques, UMR CNRS 5280, 69622 Villeurbanne Cedex, France

## Table of contents

|                                                                                                                                                                                                                                                                                                                                                                                                                                                                                                                  |     |
|------------------------------------------------------------------------------------------------------------------------------------------------------------------------------------------------------------------------------------------------------------------------------------------------------------------------------------------------------------------------------------------------------------------------------------------------------------------------------------------------------------------|-----|
| <b>Figure S1.</b> Molecular orbitals of the studied compounds                                                                                                                                                                                                                                                                                                                                                                                                                                                    | S13 |
| <b>Figure S2.</b> Electron density difference maps of title compounds from the ground state to the crucial excited state $S_0 \rightarrow S_n$ plotted using isovalues of 0.008 au                                                                                                                                                                                                                                                                                                                               | S23 |
| <b>Figure S3.</b> Calculated UV – vis absorption spectra of title compounds                                                                                                                                                                                                                                                                                                                                                                                                                                      | S25 |
| <b>Figure S4.</b> Relationship between $I_{\Psi}^{2w}$ and polarization angle $\Psi$ of Z and E isomers (green static, red $\lambda=1340$ nm, blue $\lambda=1064$ nm)                                                                                                                                                                                                                                                                                                                                            | S29 |
| <b>Table S1.</b> QTAIM calculated values of electron density ( $\rho$ ), Laplacian ( $\nabla^2(\rho)$ ), total electron energy density (H), kinetic electron energy density (G), and potential electron energy density (V) at bond critical points (au) for the Zi (i=1 to 18) compounds. <b>RCP:</b> ring critical point in N1-N2-C3-C4-N6-H; <b>BCP:</b> critical point in intramolecular H-bond N1-H...N6.                                                                                                    | S30 |
| <b>Table S2.</b> Dihedral angles ( $\varphi$ ) of Z and E isomers                                                                                                                                                                                                                                                                                                                                                                                                                                                | S31 |
| <b>Table S3.</b> Vertical transition energy ( $\Delta E_{0 \rightarrow n}$ , eV) and wavelength ( $\Delta \lambda_{0 \rightarrow n}$ , nm), oscillator strengths ( $f_{0 \rightarrow n}$ , dimensionless), charge transfer distances ( $q^{CT}$ ), charge transfer distance ( $d^{CT}$ , Å), and dipole moment variation ( $\Delta \mu_{0 \rightarrow n}$ , D) associated to the $S_0 \rightarrow S_n$ transition, as calculated at the $\omega$ B97XD/6-311+g(d) of the studied Ei and Zi (i=1 to 18) compounds | S32 |
| <b>Table S4.</b> Second harmonic generation ( $\beta_{SHG}^\lambda \equiv \beta(-2\omega; \omega, \omega)$ , a.u. ), electrooptic Pockels effect ( $\beta_{EOPE}^\lambda \equiv \beta(-\omega; \omega, 0)$ , a.u.), dynamic hyper-Rayleigh scattering ( $\beta_{HRS}^\lambda$ , a. u.) and depolarization ratio $DR^\lambda$ of Ei and Zi (i=1 to 18) compounds ( $\lambda = 695, 1064$ and $1340$ nm )                                                                                                          | S35 |
| <b>Table S5.</b> Static and dynamic $\beta_{ji}$ values of Ei and Zi (i=1 to 18) compounds                                                                                                                                                                                                                                                                                                                                                                                                                       | S36 |
| <b>Table S6.</b> The frequency dispersion factor between static and dynamic ( $\beta_{HRS}^\lambda / \beta_{HRS}^\infty$ )                                                                                                                                                                                                                                                                                                                                                                                       | S37 |
| <b>The optimized cartesian coordinates and energy of all structures</b>                                                                                                                                                                                                                                                                                                                                                                                                                                          | S38 |

|    | HOMO                                                                                | LUMO                                                                                | LUMO+1                                                                               | LUMO+3                                                                                | HOMO-3                                                                                |
|----|-------------------------------------------------------------------------------------|-------------------------------------------------------------------------------------|--------------------------------------------------------------------------------------|---------------------------------------------------------------------------------------|---------------------------------------------------------------------------------------|
| E1 | 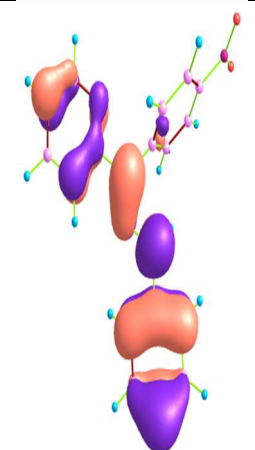   |    |    |    |    |
|    | HOMO                                                                                | LUMO                                                                                | LUMO+1                                                                               | LUMO+4                                                                                | HOMO-3                                                                                |
| E2 |   |   |   |   |   |
|    | HOMO                                                                                | LUMO                                                                                | LUMO+1                                                                               | LUMO+4                                                                                | HOMO-7                                                                                |
| E3 |  |  |  |  |  |
|    | HOMO                                                                                | LUMO                                                                                | LUMO+1                                                                               | LUMO+4                                                                                | HOMO-4                                                                                |

|    |                                                                                     |                                                                                     |                                                                                      |                                                                                       |                                                                                       |
|----|-------------------------------------------------------------------------------------|-------------------------------------------------------------------------------------|--------------------------------------------------------------------------------------|---------------------------------------------------------------------------------------|---------------------------------------------------------------------------------------|
| E4 | 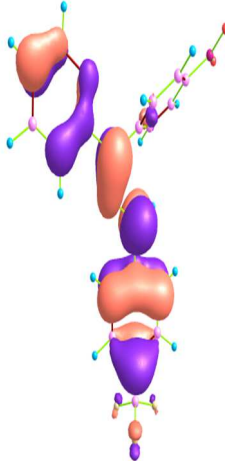   |    |    |    |    |
|    | HOMO                                                                                | LUMO                                                                                | LUMO+1                                                                               | LUMO+6                                                                                | HOMO-4                                                                                |
| E5 |   |   |   |   |   |
|    | HOMO                                                                                | LUMO                                                                                | LUMO+1                                                                               | LUMO+2                                                                                | HOMO-4                                                                                |
| E6 |  |  |  |  |  |
|    | HOMO                                                                                | LUMO                                                                                | LUMO+1                                                                               | LUMO+2                                                                                | HOMO-4                                                                                |

|    |                                                                                     |                                                                                     |                                                                                      |                                                                                       |                                                                                       |
|----|-------------------------------------------------------------------------------------|-------------------------------------------------------------------------------------|--------------------------------------------------------------------------------------|---------------------------------------------------------------------------------------|---------------------------------------------------------------------------------------|
| E7 | 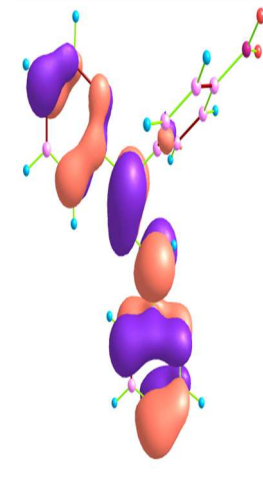   |    |    |    |    |
|    | HOMO                                                                                | LUMO                                                                                | LUMO+1                                                                               | LUMO+2                                                                                | LUMO+3                                                                                |
| E8 |   |   |   |   |   |
|    | HOMO                                                                                | LUMO                                                                                | LUMO+1                                                                               | LUMO+2                                                                                | HOMO-4                                                                                |
| E9 |  |  |  |  |  |
|    | HOMO                                                                                | LUMO                                                                                | LUMO+1                                                                               | LUMO+2                                                                                | HOMO-1                                                                                |
| Z1 |  |  |  |  |  |

|          | HOMO                                                                                | LUMO                                                                                | LUMO+1                                                                               | LUMO+2                                                                                | HOMO-4                                                                                |
|----------|-------------------------------------------------------------------------------------|-------------------------------------------------------------------------------------|--------------------------------------------------------------------------------------|---------------------------------------------------------------------------------------|---------------------------------------------------------------------------------------|
| Z2       | 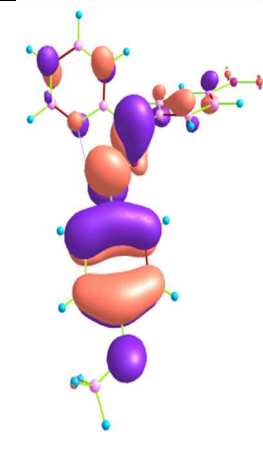   |    |    |    |    |
| Molecule | HOMO                                                                                | LUMO                                                                                | LUMO+1                                                                               | LUMO+2                                                                                | HOMO-5                                                                                |
| Z3       |   |   |   |   |   |
|          | HOMO                                                                                | LUMO                                                                                | LUMO+1                                                                               | LUMO+2                                                                                | HOMO-3                                                                                |
| Z4       |  |  |  |  |  |
|          | HOMO                                                                                | LUMO                                                                                | LUMO+1                                                                               | LUMO+2                                                                                | HOMO-6                                                                                |

|    |                                                                                     |                                                                                     |                                                                                      |                                                                                       |                                                                                       |
|----|-------------------------------------------------------------------------------------|-------------------------------------------------------------------------------------|--------------------------------------------------------------------------------------|---------------------------------------------------------------------------------------|---------------------------------------------------------------------------------------|
| Z5 | 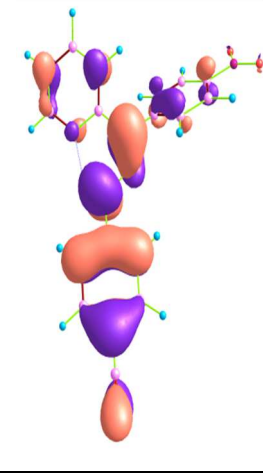   |    |    |    |    |
|    | HOMO                                                                                | LUMO                                                                                | LUMO+1                                                                               | LUMO+2                                                                                | HOMO-7                                                                                |
| Z6 |   |   |   |   |   |
|    | HOMO                                                                                | LUMO                                                                                | LUMO+1                                                                               | LUMO+3                                                                                | HOMO-7                                                                                |
| Z7 |  |  |  |  |  |
|    | HOMO                                                                                | LUMO                                                                                | LUMO+2                                                                               | LUMO+3                                                                                | LUMO+4                                                                                |

|    |                                                                                    |                                                                                    |                                                                                     |                                                                                      |                                                                                      |
|----|------------------------------------------------------------------------------------|------------------------------------------------------------------------------------|-------------------------------------------------------------------------------------|--------------------------------------------------------------------------------------|--------------------------------------------------------------------------------------|
| Z8 | 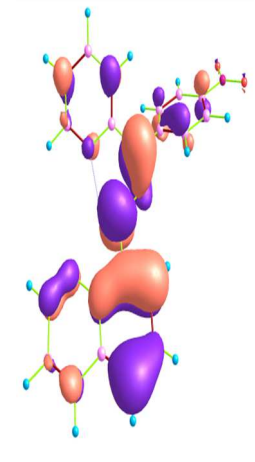  |   |   |   |   |
|    | HOMO                                                                               | LUMO                                                                               | LUMO+2                                                                              | LUMO+3                                                                               | HOMO-2                                                                               |
| Z9 |  |  |  |  |  |

| Molecule | HOMO                                                                                | LUMO                                                                                | LUMO+1                                                                               | LUMO+2                                                                                | HOMO-4                                                                                |
|----------|-------------------------------------------------------------------------------------|-------------------------------------------------------------------------------------|--------------------------------------------------------------------------------------|---------------------------------------------------------------------------------------|---------------------------------------------------------------------------------------|
| E10      | 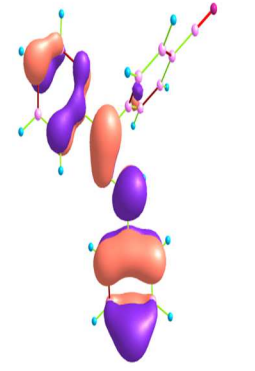 |  |  |  |  |
|          | HOMO                                                                                | LUMO                                                                                | LUMO+1                                                                               | LUMO+4                                                                                | HOMO-3                                                                                |



|     |                                                                                     |                                                                                     |                                                                                      |                                                                                       |                                                                                       |
|-----|-------------------------------------------------------------------------------------|-------------------------------------------------------------------------------------|--------------------------------------------------------------------------------------|---------------------------------------------------------------------------------------|---------------------------------------------------------------------------------------|
| E11 | 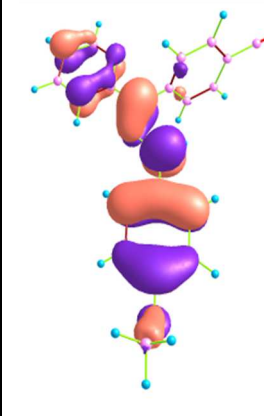    |     |     |     |     |
|     | HOMO                                                                                | LUMO                                                                                | LUMO+1                                                                               | LUMO+5                                                                                | HOMO-1                                                                                |
| E12 |    |    |    |    |    |
|     | HOMO                                                                                | LUMO                                                                                | LUMO+1                                                                               | LUMO+4                                                                                | HOMO-1                                                                                |
| E13 |   |   |   |   |   |
|     | HOMO                                                                                | LUMO                                                                                | LUMO+1                                                                               | LUMO+3                                                                                | HOMO-1                                                                                |
| E14 |  |  |  |  |  |
|     | HOMO                                                                                | LUMO                                                                                | LUMO+1                                                                               | LUMO+2                                                                                | HOMO-2                                                                                |

|     |                                                                                     |                                                                                     |                                                                                      |                                                                                       |                                                                                       |
|-----|-------------------------------------------------------------------------------------|-------------------------------------------------------------------------------------|--------------------------------------------------------------------------------------|---------------------------------------------------------------------------------------|---------------------------------------------------------------------------------------|
| E15 | 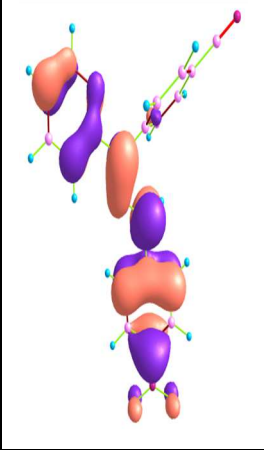    |     |     |     |     |
|     | HOMO                                                                                | LUMO                                                                                | LUMO+1                                                                               | LUMO+3                                                                                | HOMO-1                                                                                |
| E16 |   |   |   |   |   |
|     | HOMO                                                                                | LUMO                                                                                | LUMO+1                                                                               | LUMO+2                                                                                | HOMO-2                                                                                |
| E17 |  |  |  |  |  |
|     | HOMO                                                                                | LUMO                                                                                | LUMO+2                                                                               | HOMO-1                                                                                | HOMO-2                                                                                |
| E18 |  |  |  |  |  |
|     | HOMO                                                                                | LUMO                                                                                | LUMO+1                                                                               | LUMO+2                                                                                | HOMO-3                                                                                |

|     |                                                                                     |                                                                                     |                                                                                      |                                                                                       |                                                                                       |
|-----|-------------------------------------------------------------------------------------|-------------------------------------------------------------------------------------|--------------------------------------------------------------------------------------|---------------------------------------------------------------------------------------|---------------------------------------------------------------------------------------|
| Z10 | 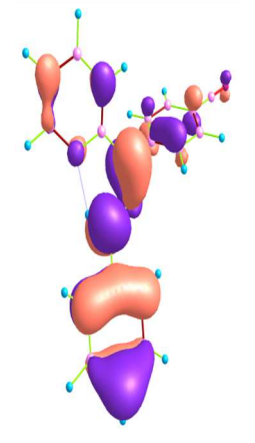    |     |     |     |     |
|     | HOMO                                                                                | LUMO                                                                                | LUMO+1                                                                               | LUMO+5                                                                                | HOMO-4                                                                                |
| Z11 |   |   |   |   |   |
|     | HOMO                                                                                | LUMO                                                                                | LUMO+1                                                                               | LUMO+2                                                                                | HOMO-4                                                                                |
| Z12 |  |  |  |  |  |
|     | HOMO                                                                                | LUMO                                                                                | LUMO+1                                                                               | LUMO+2                                                                                | HOMO-2                                                                                |
| Z13 |  |  |  |  |  |
|     | HOMO                                                                                | LUMO                                                                                | LUMO+1                                                                               | LUMO+2                                                                                | HOMO-1                                                                                |

|     |                                                                                     |                                                                                     |                                                                                      |                                                                                       |                                                                                       |
|-----|-------------------------------------------------------------------------------------|-------------------------------------------------------------------------------------|--------------------------------------------------------------------------------------|---------------------------------------------------------------------------------------|---------------------------------------------------------------------------------------|
| Z14 | 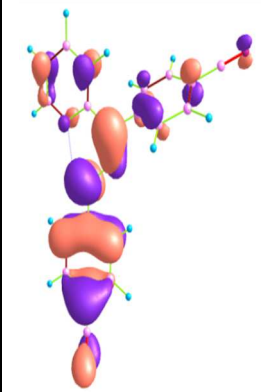    |     |     |     |     |
|     | HOMO                                                                                | LUMO                                                                                | LUMO+1                                                                               | LUMO+4                                                                                | HOMO-1                                                                                |
| Z15 |    |    |    |    |    |
|     | HOMO                                                                                | LUMO                                                                                | LUMO+1                                                                               | LUMO+2                                                                                | HOMO-2                                                                                |
| Z16 |  |  |  |  |  |
|     | HOMO                                                                                | LUMO                                                                                | LUMO+1                                                                               | LUMO+2                                                                                | HOMO-3                                                                                |
| Z17 |  |  |  |  |  |
|     | HOMO                                                                                | LUMO                                                                                | LUMO+1                                                                               | LUMO+2                                                                                | HOMO-2                                                                                |

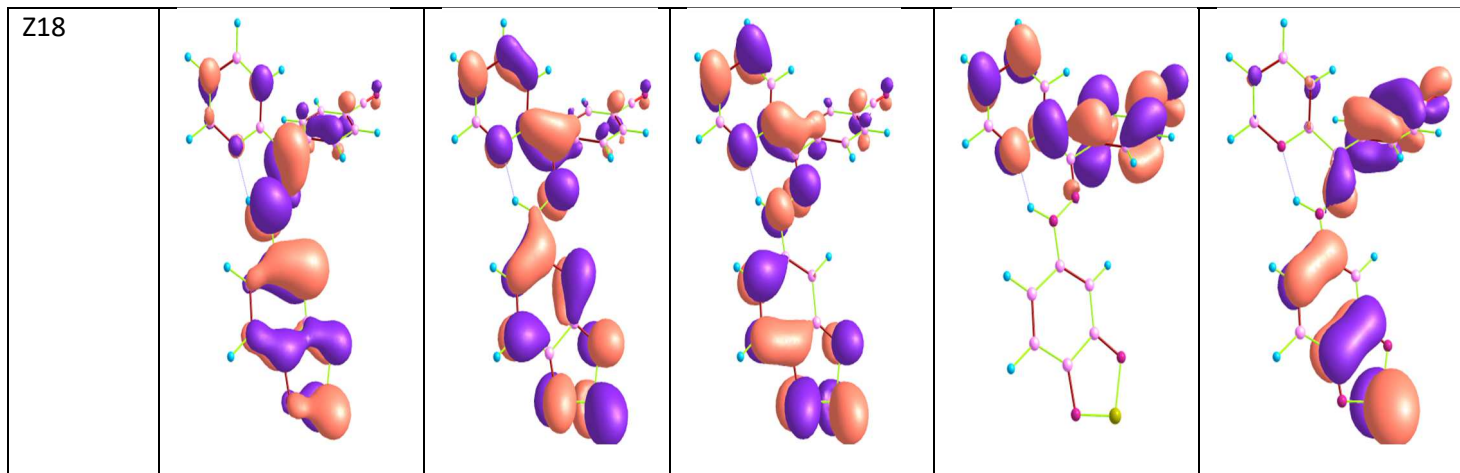

**Figure S1.** Molecular orbitals of the studied compounds

|    |       |       |       |        |
|----|-------|-------|-------|--------|
|    | S0→S1 | S0→S3 | S0→S8 | S0→S15 |
| E1 |       |       |       |        |
|    | S0→S1 | S0→S3 | S0→S5 | S0→S15 |
| E2 |       |       |       |        |
|    | S0→S1 | S0→S2 | S0→S4 | S0→S9  |
| E3 |       |       |       |        |
|    | S0→S1 | S0→S3 | S0→S6 | S0→S7  |

|    |       |       |       |        |
|----|-------|-------|-------|--------|
| E4 |       |       |       |        |
|    | S0→S1 | S0→S3 | S0→S7 | S0→S14 |
| E5 |       |       |       |        |
|    | S0→S1 | S0→S4 | S0→S7 | S0→S10 |
| E6 |       |       |       |        |
|    | S0→S1 | S0→S3 | S0→S7 | S0→S8  |

|    |       |       |        |        |
|----|-------|-------|--------|--------|
| E7 |       |       |        |        |
|    | S0→S1 | S0→S2 | S0→S3  | S0→S10 |
| E8 |       |       |        |        |
|    | S0→S1 | S0→S3 | S0→S4  | S0→S9  |
| E9 |       |       |        |        |
|    | S0→S1 | S0→S6 | S0→S10 | S0→S16 |



|    |                                                                                     |                                                                                     |                                                                                      |                                                                                       |
|----|-------------------------------------------------------------------------------------|-------------------------------------------------------------------------------------|--------------------------------------------------------------------------------------|---------------------------------------------------------------------------------------|
| Z1 | 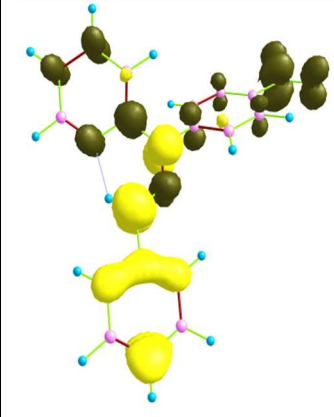   |    |    |    |
|    | S0→S1                                                                               | S0→S2                                                                               | S0→S4                                                                                | S0→S8                                                                                 |
| Z2 |    |    |    |    |
|    | S0→S1                                                                               | S0→S2                                                                               | S0→S3                                                                                | S0→S7                                                                                 |
| Z3 |  |  |  |  |
|    | S0→S1                                                                               | S0→S6                                                                               | S0→S3                                                                                | S0→S7                                                                                 |

|    |                                                                                     |                                                                                     |                                                                                      |                                                                                       |
|----|-------------------------------------------------------------------------------------|-------------------------------------------------------------------------------------|--------------------------------------------------------------------------------------|---------------------------------------------------------------------------------------|
| Z4 | 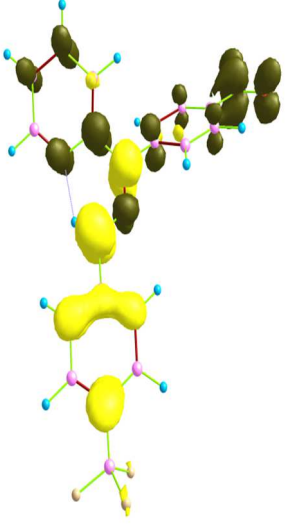   |    |    |    |
|    | S0→S1                                                                               | S0→S2                                                                               | S0→S3                                                                                | S0→S6                                                                                 |
| Z5 |   |   |   |   |
|    | S0→S1                                                                               | S0→S2                                                                               | S0→S4                                                                                | S0→S8                                                                                 |
| Z6 |  |  |  |  |
|    | S0→S1                                                                               | S0→S2                                                                               | S0→S3                                                                                | S0→S11                                                                                |

|    |                                                                                     |                                                                                     |                                                                                      |                                                                                       |
|----|-------------------------------------------------------------------------------------|-------------------------------------------------------------------------------------|--------------------------------------------------------------------------------------|---------------------------------------------------------------------------------------|
| Z7 | 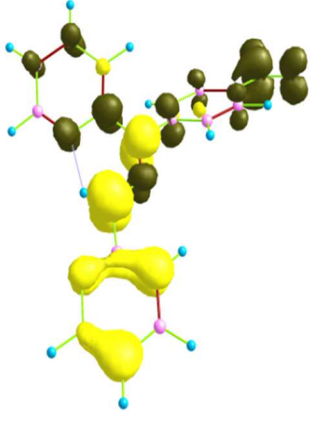   |    |    |    |
|    | S0→S1                                                                               | S0→S4                                                                               | S0→S5                                                                                | S0→S8                                                                                 |
| Z8 |   |   |   |   |
|    | S0→S1                                                                               | S0→S3                                                                               | S0→S8                                                                                | S0→S11                                                                                |
| Z9 |  |  |  |  |

|     |                                                                                     |                                                                                     |                                                                                      |                                                                                       |
|-----|-------------------------------------------------------------------------------------|-------------------------------------------------------------------------------------|--------------------------------------------------------------------------------------|---------------------------------------------------------------------------------------|
|     | S0→S1                                                                               | S0→S2                                                                               | S0→S5                                                                                | S0→S16                                                                                |
| E10 | 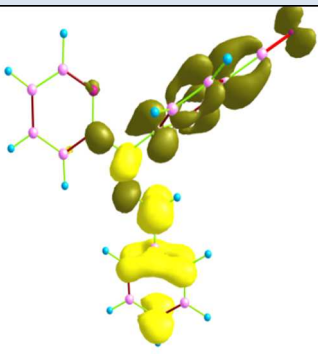   |    |    |    |
|     | S0→S1                                                                               | S0→S2                                                                               | S0→S3                                                                                | S0→S10                                                                                |
| E11 |    |    |    |    |
|     | S0→S1                                                                               | S0→S2                                                                               | S0→S3                                                                                | S0→S4                                                                                 |
| E12 |   |   |   |   |
|     | S0→S1                                                                               | S0→S2                                                                               | S0→S3                                                                                | S0→S4                                                                                 |
| E13 |  |  |  |  |
|     | S0→S1                                                                               | S0→S2                                                                               | S0→S8                                                                                | S0→S13                                                                                |

|     |       |       |       |        |
|-----|-------|-------|-------|--------|
| E14 |       |       |       |        |
|     | S0→S1 | S0→S4 | S0→S7 | S0→S15 |
| E15 |       |       |       |        |
|     | S0→S1 | S0→S2 | S0→S3 | S0→S4  |
| E16 |       |       |       |        |
|     | S0→S1 | S0→S2 | S0→S4 | S0→S13 |
| E17 |       |       |       |        |
|     | S0→S1 | S0→S2 | S0→S3 | S0→S12 |

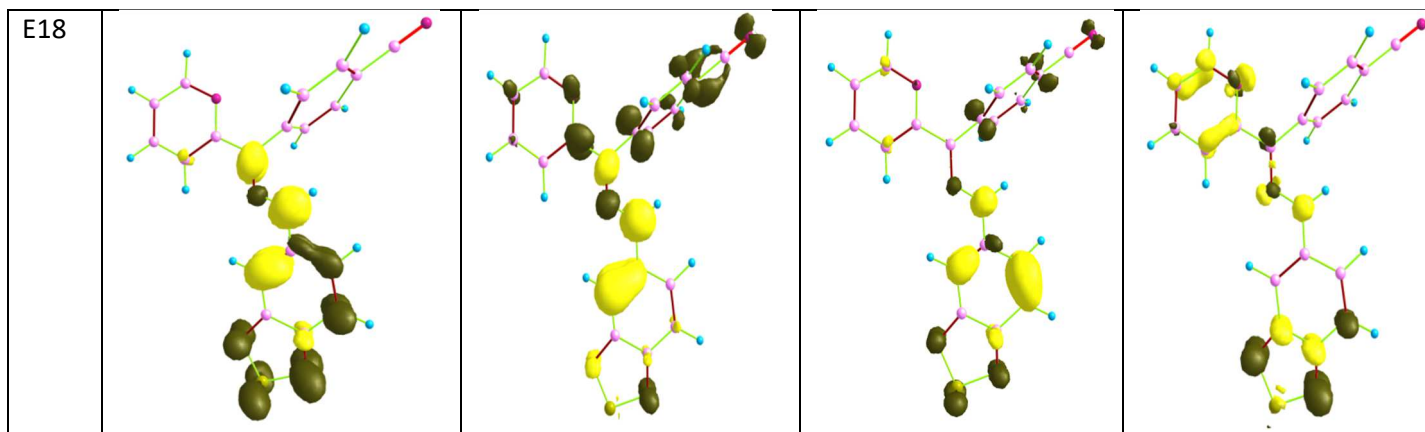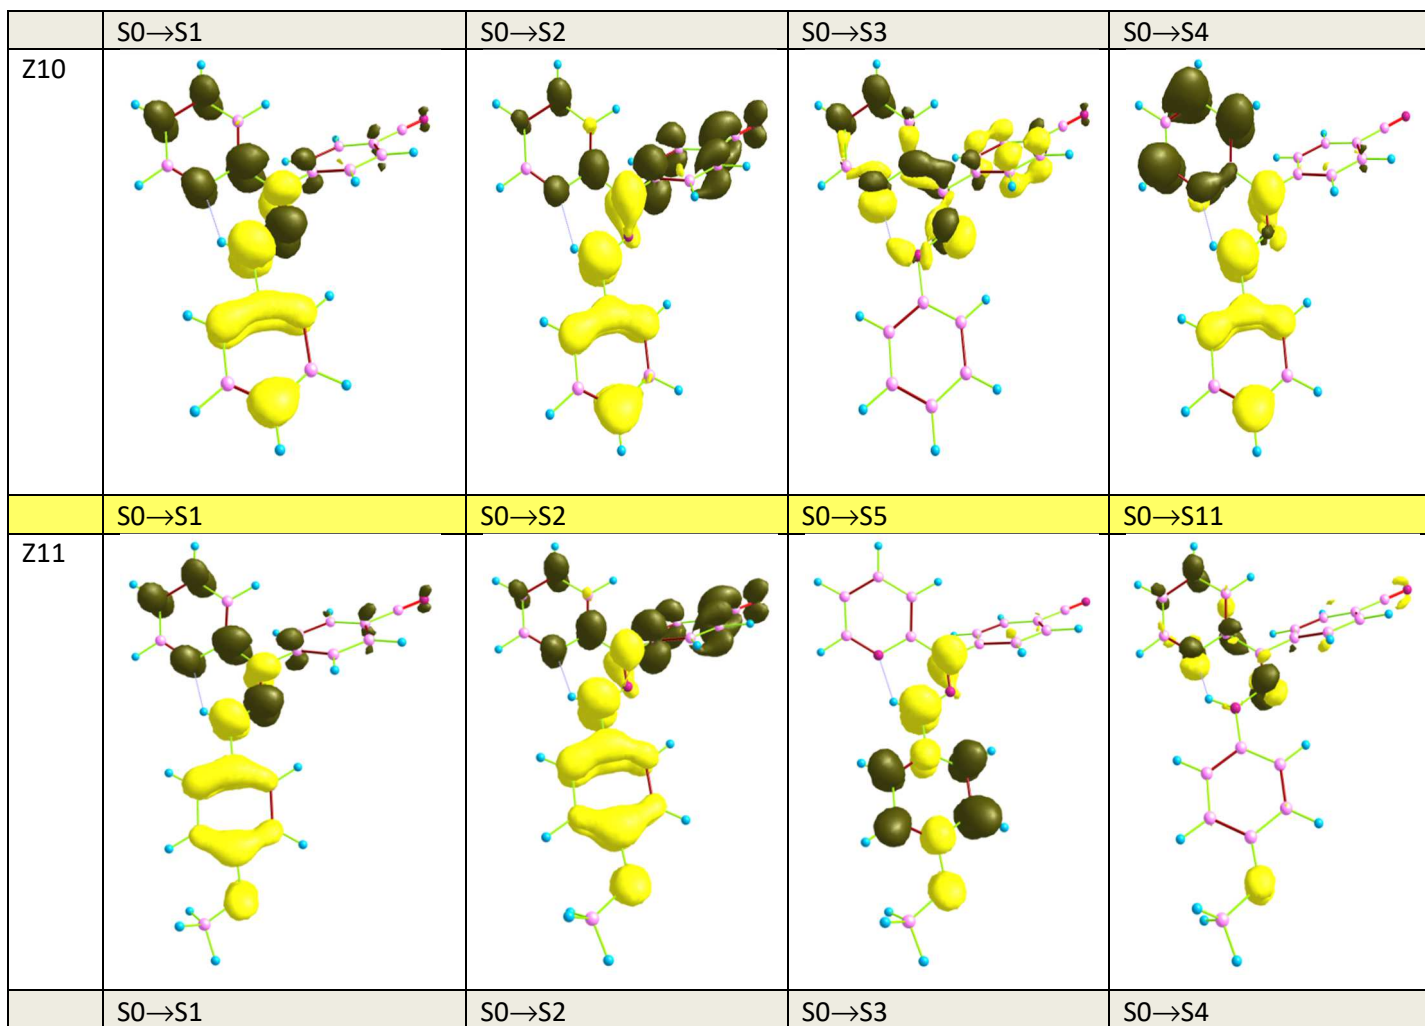

|     |       |       |        |        |
|-----|-------|-------|--------|--------|
| Z12 |       |       |        |        |
|     | S0→S1 | S0→S3 | S0→S4  | S0→S14 |
| Z13 |       |       |        |        |
|     | S0→S1 | S0→S3 | S0→S7  | S0→S9  |
| Z14 |       |       |        |        |
|     | S0→S1 | S0→S4 | S0→S12 | S0→S15 |
| Z15 |       |       |        |        |
|     | S0→S1 | S0→S2 | S0→S3  | S0→S4  |

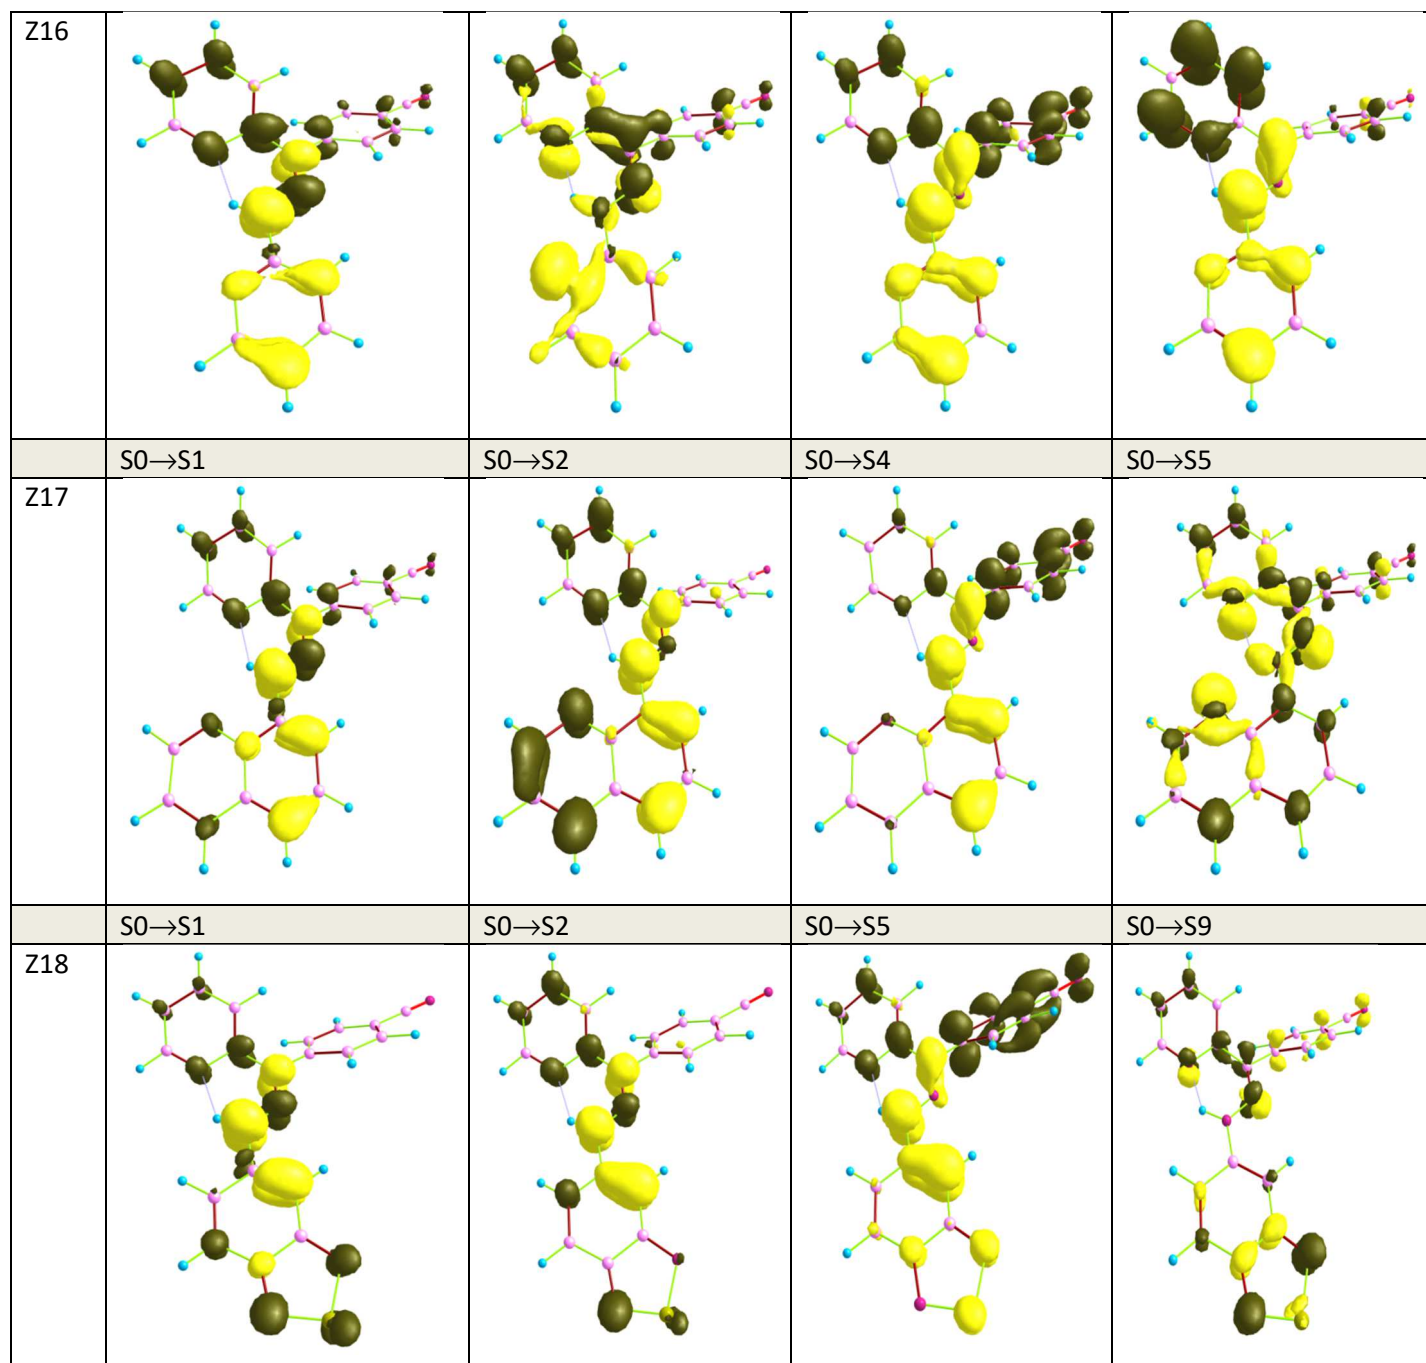

**Figure S2.** Electron density difference maps of title compounds from the ground state to the crucial excited state  $S_0 \rightarrow S_n$  plotted using isovalues of 0.008 au



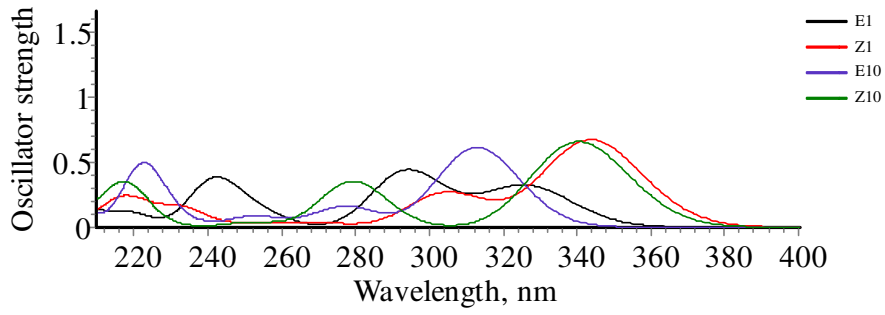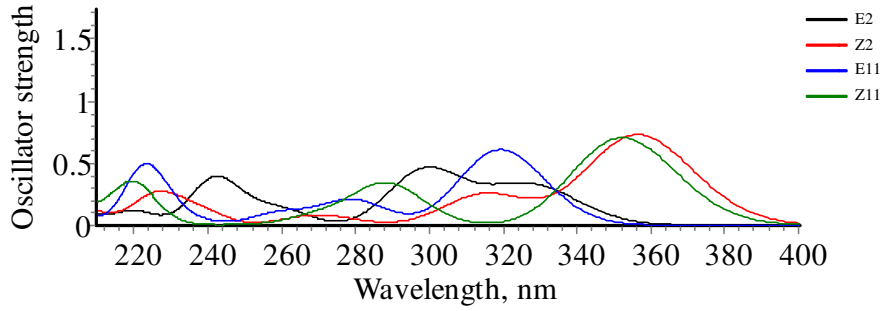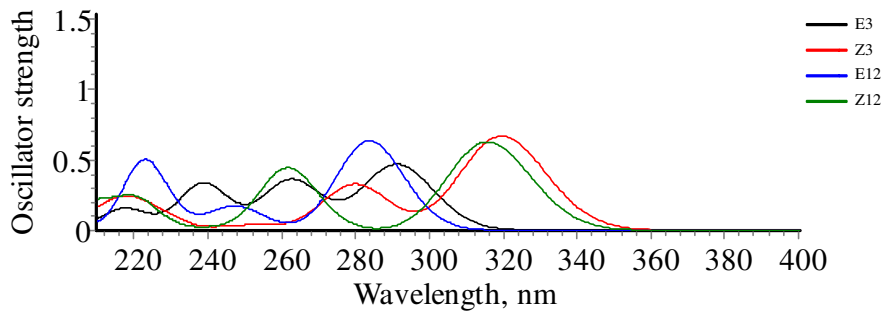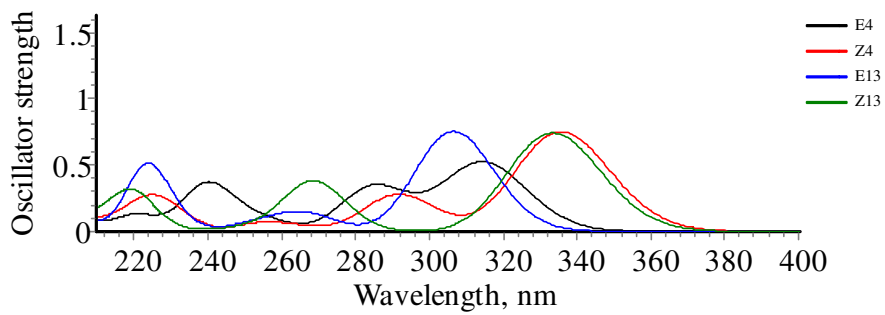

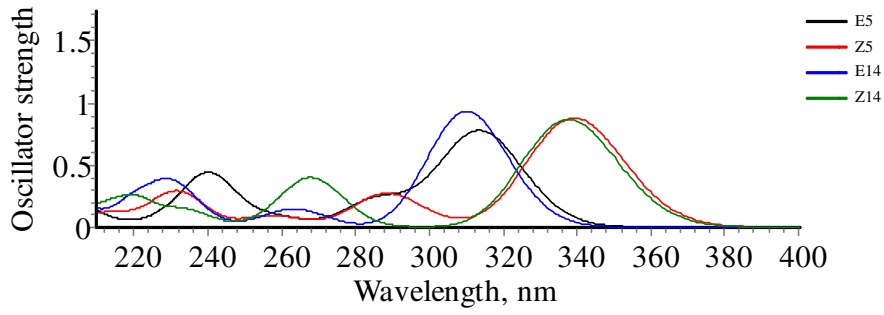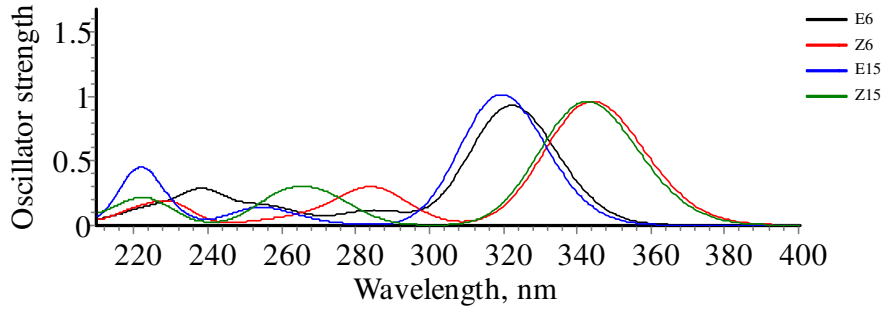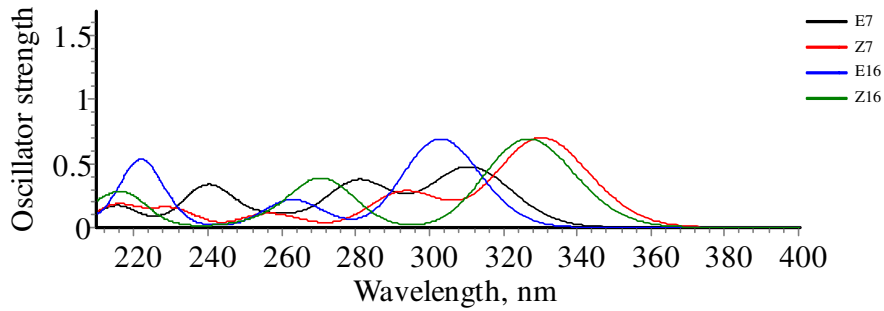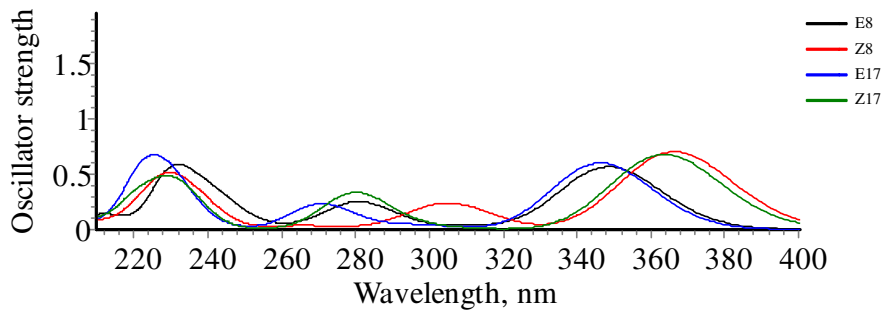

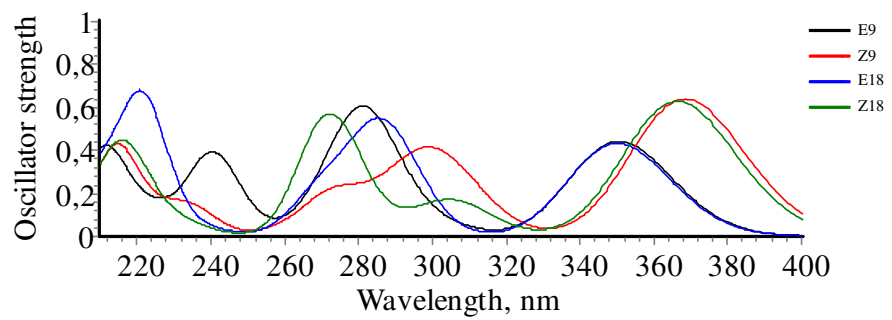

**Figure S3.** Calculated UV – vis absorption spectra of title compounds

### E-isomer

### Z-Isomer

2

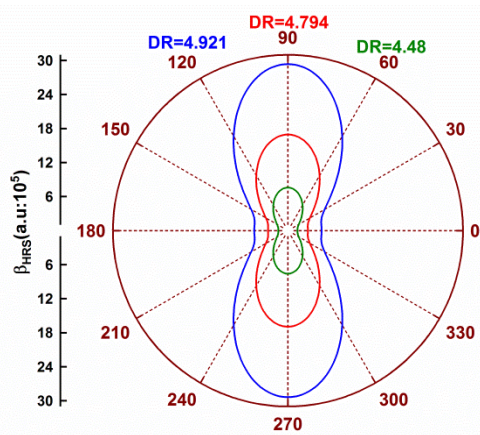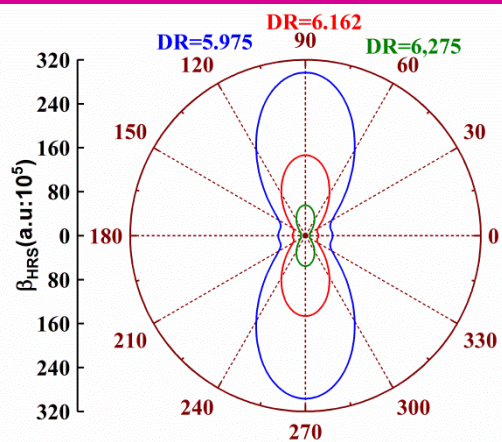

3

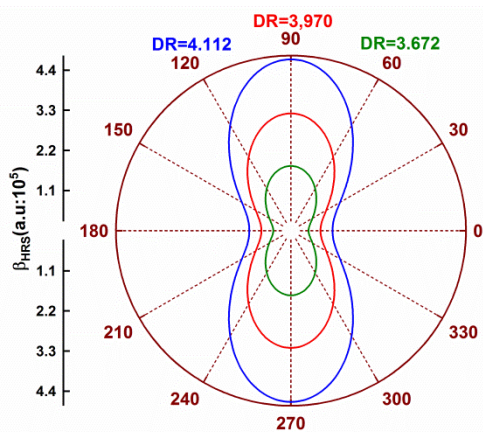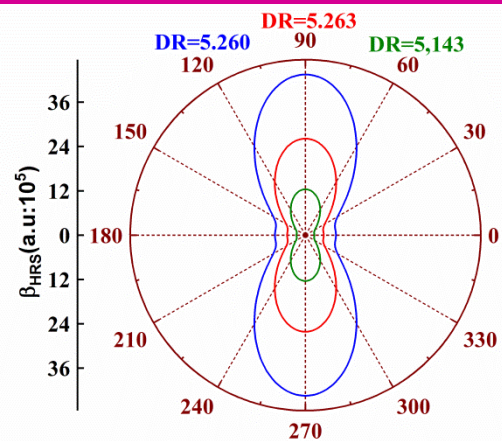

4

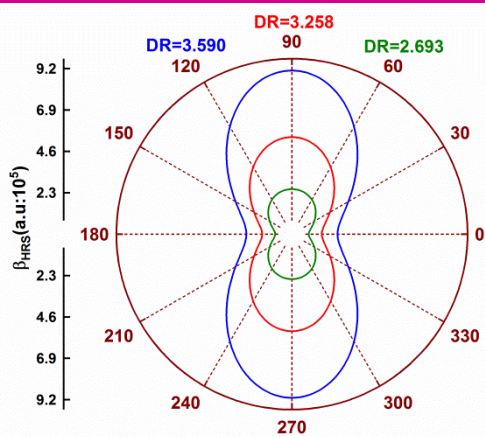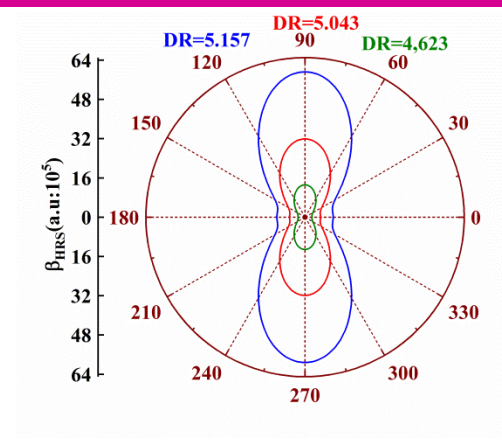

6

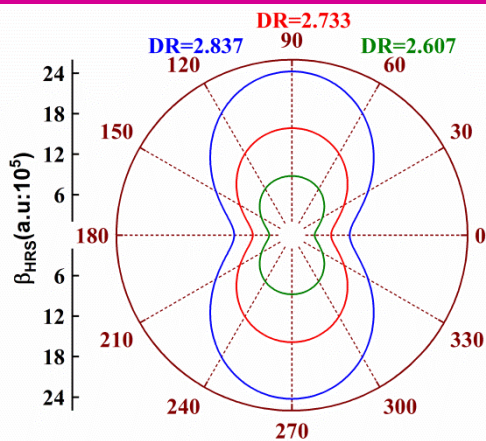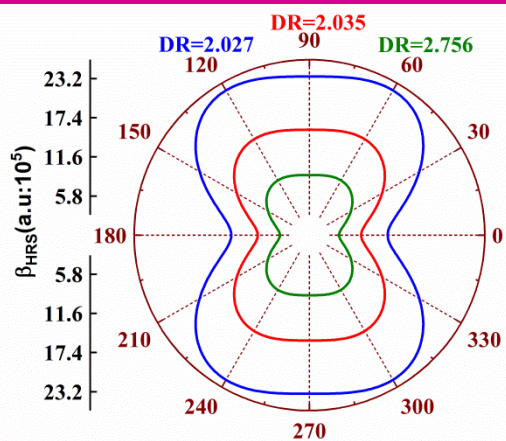

7

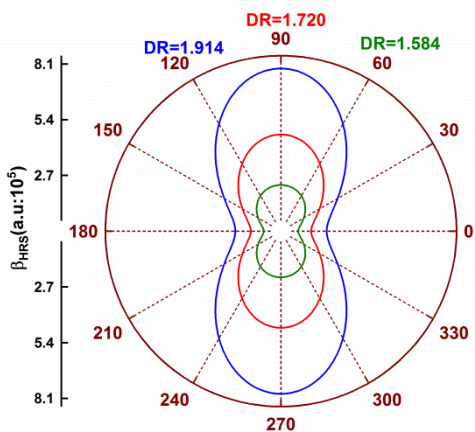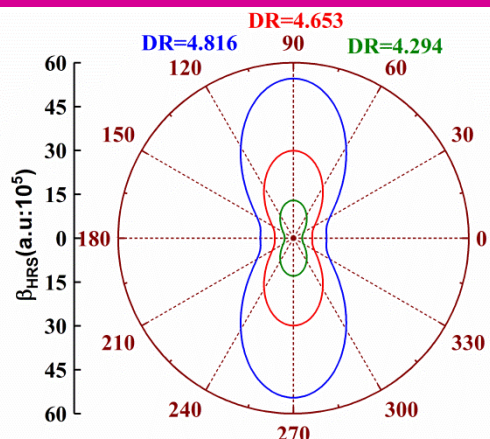

8

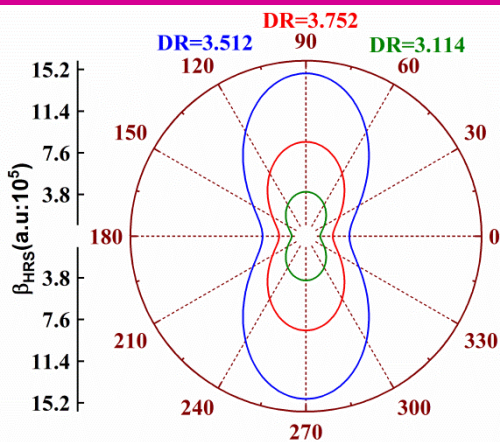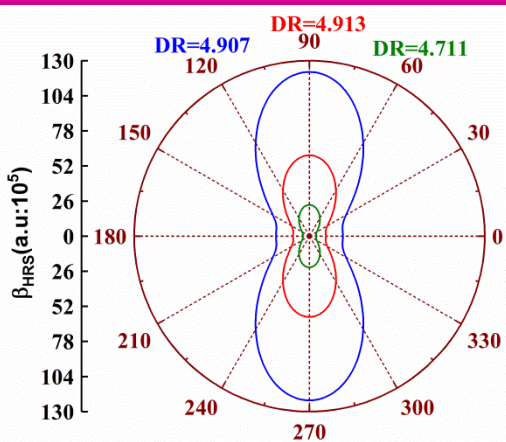

9

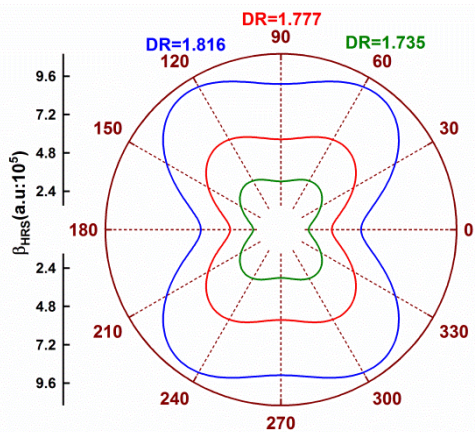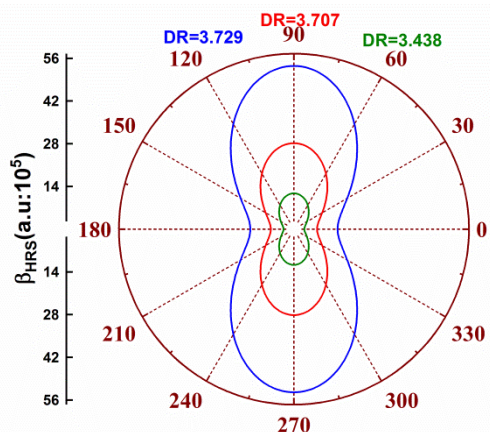

10

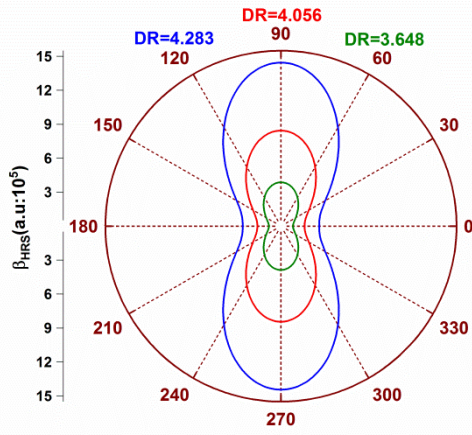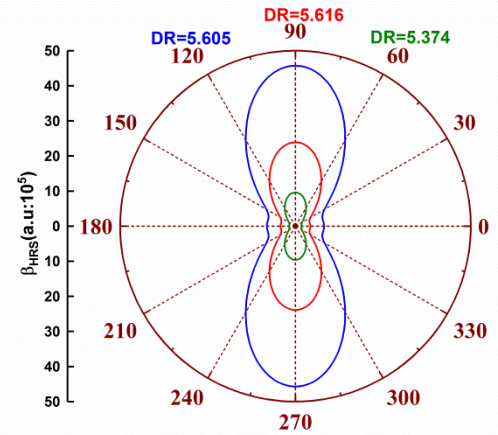

11

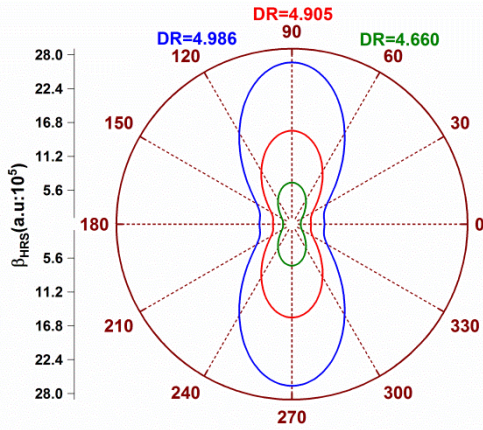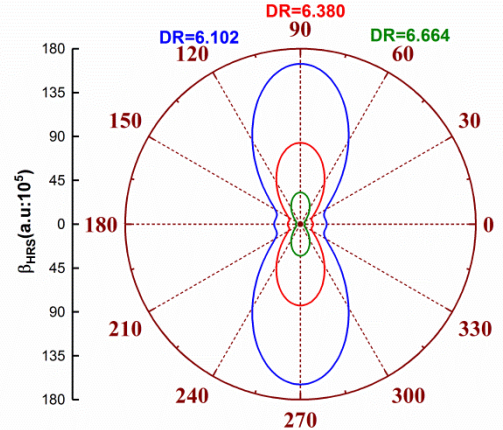

12

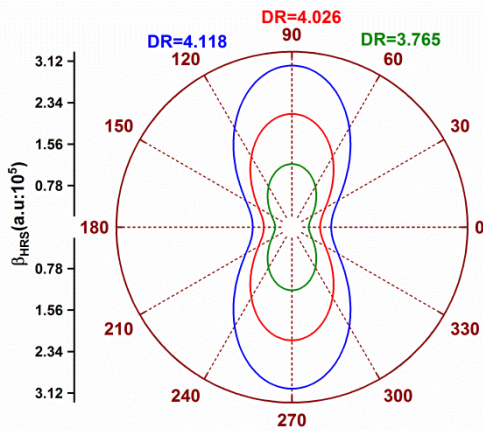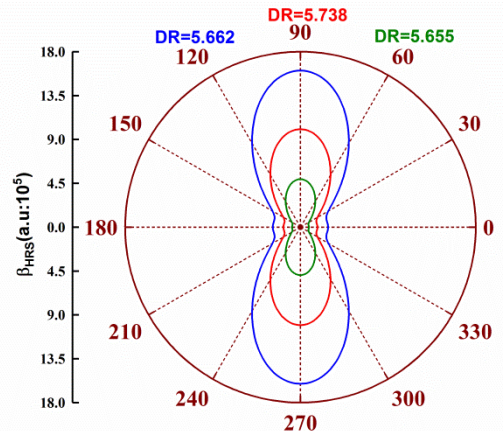

13

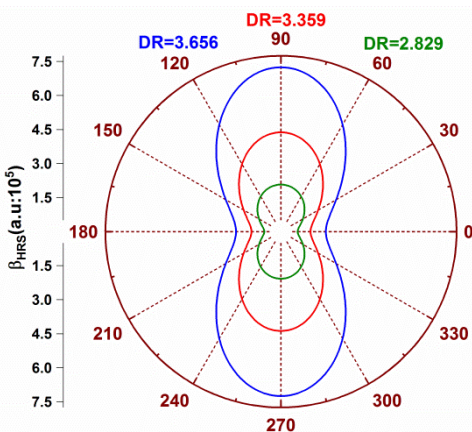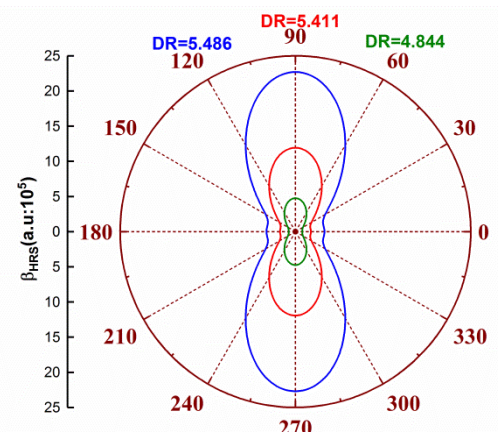

14

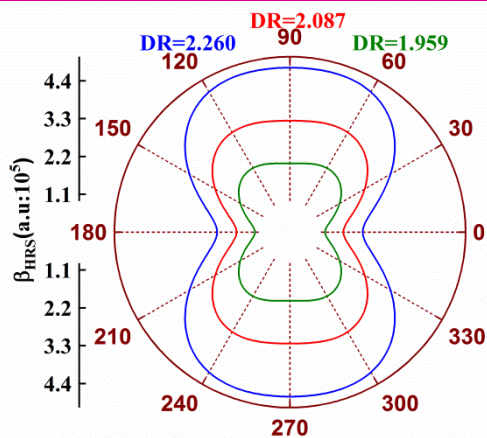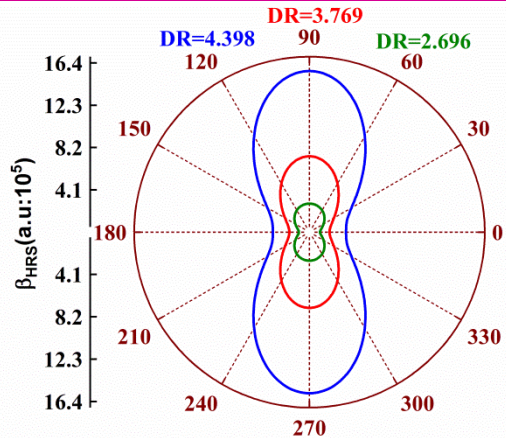

15

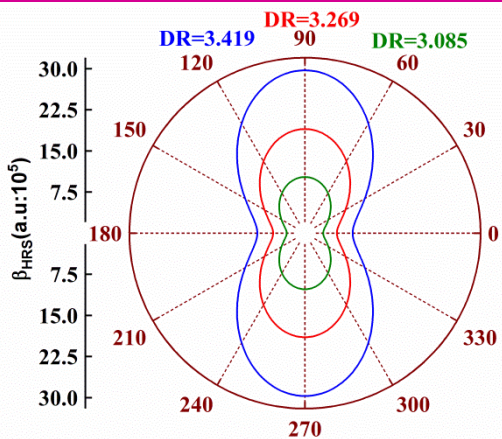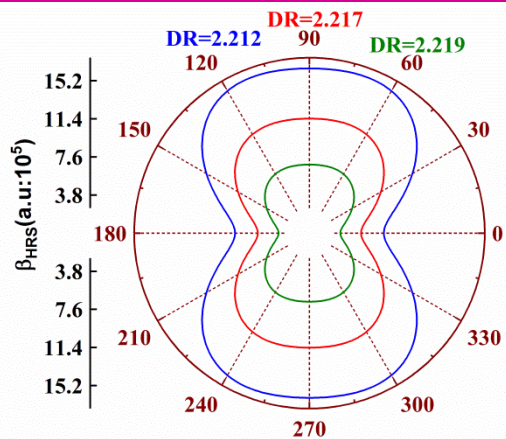

16

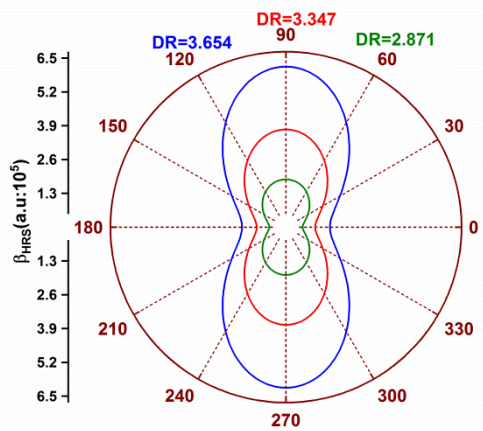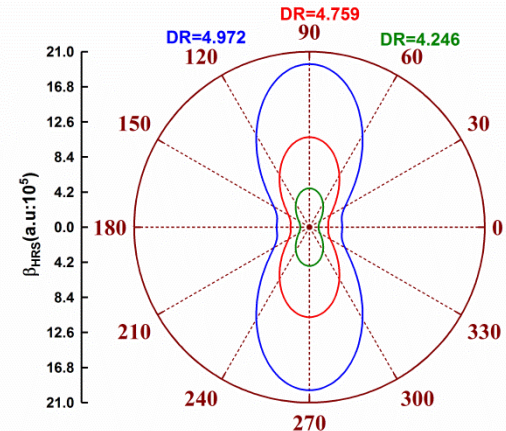

17

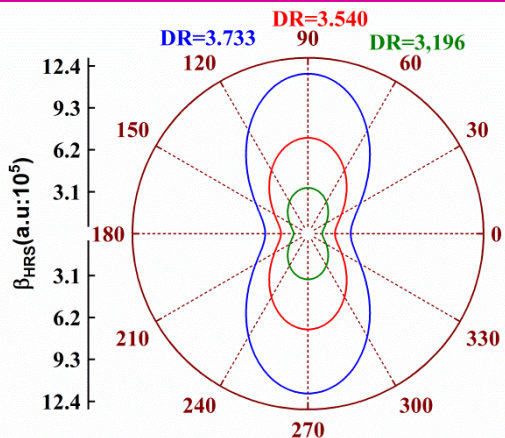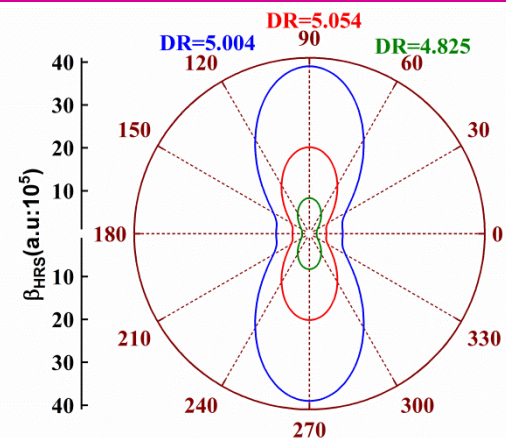

18

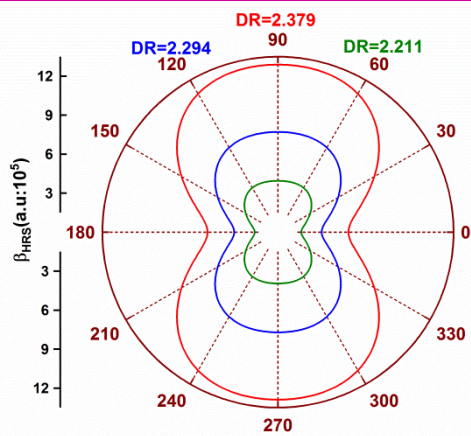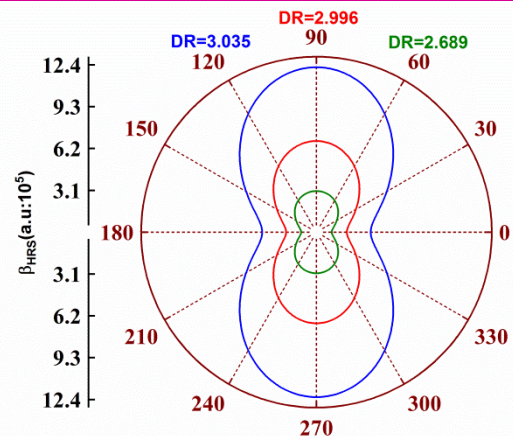

**Figure S4.** Relationship between  $I_{\Psi\Psi}^{2w}$  and polarization angle  $\Psi$  of Z and E isomers (green static, red  $\lambda=1340\text{nm}$ , blue  $\lambda=1064\text{nm}$ )



**Table S1.** QTAIM calculated values of electron density ( $\rho$ ), Laplacian ( $\nabla^2(\rho)$ ), total electron energy density (H), kinetic electron energy density (G), and potential electron energy density (V) at bond critical points (au) for the Zi (i=1 to 18) compounds. **RCP:** ring critical point in N1-N2-C3-C4-N6-H; **BCP:** critical point in intramolecular H-bond N1-H...N6.

|           |            | $\rho$ | $\nabla$ | G     | V      | H       |            |            | $\rho$ | $\nabla$ | G     | V      | H       |
|-----------|------------|--------|----------|-------|--------|---------|------------|------------|--------|----------|-------|--------|---------|
| <b>Z1</b> | <b>RCP</b> | 0.015  | 0.099    | 0.019 | -0.014 | 0.005   | <b>Z10</b> | <b>RCP</b> | 0.015  | 0.100    | 0.019 | -0.014 | 0.005   |
|           | <b>BCP</b> | 0.034  | 0.106    | 0.028 | -0.029 | -0.001  |            | <b>BCP</b> | 0.034  | 0.108    | 0.028 | -0.030 | -0.001  |
| <b>Z2</b> | <b>RCP</b> | 0.015  | 0.099    | 0.019 | -0.014 | 0.005   | <b>Z11</b> | <b>RCP</b> | 0.015  | 0.099    | 0.019 | -0.014 | 0.005   |
|           | <b>BCP</b> | 0.034  | 0.107    | 0.028 | -0.029 | -0.001  |            | <b>BCP</b> | 0.034  | 0.107    | 0.028 | -0.029 | -0.001  |
| <b>Z3</b> | <b>RCP</b> | 0.016  | 0.101    | 0.020 | -0.014 | 0.005   | <b>Z12</b> | <b>RCP</b> | 0.016  | 0.100    | 0.019 | -0.014 | 0.005   |
|           | <b>BCP</b> | 0.034  | 0.107    | 0.028 | -0.029 | -0.001  |            | <b>BCP</b> | 0.033  | 0.106    | 0.027 | -0.029 | -0.001  |
| <b>Z4</b> | <b>RCP</b> | 0.015  | 0.099    | 0.019 | -0.014 | 0.005   | <b>Z13</b> | <b>RCP</b> | 0.015  | 0.100    | 0.019 | -0.014 | 0.005   |
|           | <b>BCP</b> | 0.034  | 0.107    | 0.028 | -0.029 | -0.001  |            | <b>BCP</b> | 0.035  | 0.109    | 0.029 | -0.030 | -0.001  |
| <b>Z5</b> | <b>RCP</b> | 0.015  | 0.099    | 0.019 | -0.014 | 0.005   | <b>Z14</b> | <b>RCP</b> | 0.015  | 0.100    | 0.019 | -0.014 | 0.005   |
|           | <b>BCP</b> | 0.034  | 0.107    | 0.028 | -0.030 | 0.001   |            | <b>BCP</b> | 0.034  | 0.107    | 0.028 | -0.030 | -0.001  |
| <b>Z6</b> | <b>RCP</b> | 0.015  | 0.100    | 0.019 | -0.014 | 0.005   | <b>Z15</b> | <b>RCP</b> | 0.015  | 0.100    | 0.019 | -0.014 | 0.005   |
|           | <b>BCP</b> | 0.035  | 0.108    | 0.029 | -0.030 | -0.001  |            | <b>BCP</b> | 0.035  | 0.108    | 0.028 | -0.030 | -0.001  |
| <b>Z7</b> | <b>RCP</b> | 0.015  | 0.096    | 0.019 | -0.013 | -0.005  | <b>Z16</b> | <b>RCP</b> | 0.015  | 0.097    | 0.019 | -0.013 | 0.005   |
|           | <b>BCP</b> | 0.031  | 0.102    | 0.026 | -0.026 | -0.0004 |            | <b>BCP</b> | 0.031  | 0.103    | 0.026 | -0.027 | -0.0005 |
| <b>Z8</b> | <b>RCP</b> | 0.012  | 0.098    | 0.019 | -0.014 | 0.005   | <b>Z17</b> | <b>RCP</b> | 0.015  | 0.098    | 0.019 | -0.014 | 0.005   |
|           | <b>BCP</b> | 0.032  | 0.104    | 0.026 | -0.027 | -0.0005 |            | <b>BCP</b> | 0.031  | 0.103    | 0.026 | -0.027 | -0.0003 |
| <b>Z9</b> | <b>RCP</b> | 0.016  | 0.100    | 0.019 | -0.014 | 0.005   | <b>Z18</b> | <b>RCP</b> | 0.015  | 0.099    | 0.019 | -0.014 | 0.005   |
|           | <b>BCP</b> | 0.034  | 0.107    | 0.028 | -0.029 | -0.001  |            | <b>BCP</b> | 0.034  | 0.107    | 0.028 | -0.029 | -0.001  |

**Table S2.** Dihedral angles ( $\varphi$ ) of Z and E isomers

| Zi         | $\varphi_2$ | $\varphi_1$ | $\varphi'_2$ | $\varphi'_1$ | $\varphi_3$ | Ei         | $\varphi_2$ | $\varphi_1$ | $\varphi'_2$ | $\varphi'_1$ |
|------------|-------------|-------------|--------------|--------------|-------------|------------|-------------|-------------|--------------|--------------|
| <b>Z1</b>  | -43.81      | -18.94      | -177.88      | 3.64         | 130.50      | <b>E1</b>  | 69.78       | -174.47     | 1.03         | -178.75      |
| <b>Z2</b>  | -42.30      | -18.70      | -177.95      | 4.11         | 130.30      | <b>E2</b>  | 72.94       | 179.91      | 0.92         | -179.03      |
| <b>Z3</b>  | -38.63      | -25.01      | -179.96      | 1.81         | 129.90      | <b>E3</b>  | 69.92       | 175.36      | -0.64        | 179.08       |
| <b>Z4</b>  | -45.89      | -18.96      | -175.20      | 3.25         | 130.72      | <b>E4</b>  | 70.08       | -173.64     | 1.52         | -178.61      |
| <b>Z5</b>  | -46.95      | -17.72      | -178.33      | 3.42         | 130.70      | <b>E5</b>  | 74.13       | -175.16     | 1.53         | -179.00      |
| <b>Z6</b>  | -46.89      | -18.58      | -178.24      | 3.17         | 131.13      | <b>E6</b>  | 71.13       | -174.14     | 1.56         | -178.72      |
| <b>Z7</b>  | -43.62      | -20.57      | -178.18      | 3.28         | 127.69      | <b>E7</b>  | 68.19       | -173.24     | 1.45         | -178.61      |
| <b>Z8</b>  | -42.57      | -20.59      | -177.98      | 3.70         | 127.52      | <b>E8</b>  | 67.09       | -172.88     | 1.56         | -178.46      |
| <b>Z9</b>  | -41.07      | -21.45      | -178.33      | 3.62         | 130.77      | <b>E9</b>  | 75.98       | -175.55     | 1.23         | -178.99      |
| <b>Z10</b> | -45.81      | -17.53      | -178.51      | 3.79         | 130.61      | <b>E10</b> | 72.71       | -175.80     | 1.42         | -178.96      |
| <b>Z11</b> | -44.21      | -18.78      | -177.85      | 3.69         | 130.56      | <b>E11</b> | 69.18       | -172.95     | 1.38         | -178.55      |
| <b>Z12</b> | -38.28      | -25.52      | 179.89       | 1.70         | 129.44      | <b>E12</b> | 71.71       | 174.29      | -0.95        | 179.31       |
| <b>Z13</b> | -45.89      | -18.96      | -178.20      | 3.25         | 130.70      | <b>E13</b> | 70.08       | -173.64     | 1.52         | -178.61      |
| <b>Z14</b> | -46.71      | -19.25      | -178.29      | 3.11         | 130.93      | <b>E14</b> | 74.83       | -173.69     | 1.12         | -178.93      |
| <b>Z15</b> | -47.43      | -18.01      | -178.76      | 2.97         | 130.91      | <b>E15</b> | 74.14       | -173.45     | 1.16         | -178.82      |
| <b>Z16</b> | -44.42      | -19.94      | -178.60      | 3.42         | 127.82      | <b>E16</b> | 71.01       | -174.92     | 1.51         | -178.94      |
| <b>Z17</b> | -42.11      | -22.04      | -177.73      | 3.68         | 127.51      | <b>E17</b> | 66.94       | -173.00     | 1.57         | -178.42      |
| <b>Z18</b> | -44.01      | -19.11      | -178.95      | 3.31         | 130.48      | <b>E18</b> | 79.84       | -176.62     | 1.13         | -179.19      |

$\varphi_3$ : N1HN6

$\varphi_2$ : N2C3C5C7

$\varphi_1$ : N2C3C4N6

$\varphi'_2$ : N1N2C3C5

$\varphi'_1$ : N1N2C3C4

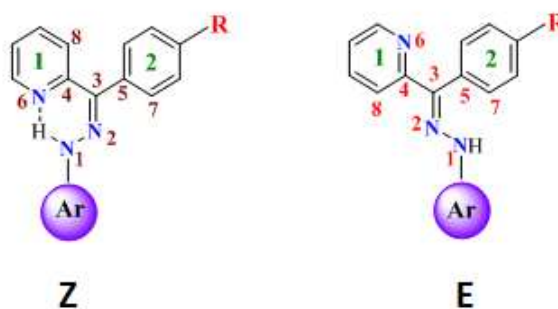

**Table S3.** Vertical transition energy ( $\Delta E_{0 \rightarrow n}$ , eV) and wavelength ( $\Delta \lambda_{0 \rightarrow n}$ , nm), oscillator strengths ( $f_{0 \rightarrow n}$ , dimensionless), charge transfer distances ( $q^{CT}$ ), charge transfer distance ( $d^{CT}$ , Å), and dipole moment variation ( $\Delta \mu_{0 \rightarrow n}$ , D) associated to the  $S_0 \rightarrow S_n$  transition, as calculated at the  $\omega$ B97XD/6-311+g(d) of the studied  $E_i$  and  $Z_i$  ( $i=1$  to 18) compounds

| NO <sub>2</sub>    | Sn | E     | $\lambda$ | $f_{os}$ | %  | $d^{CT}$ | $q^{CT}$ | $\Delta \mu_{0 \rightarrow n}$ | Transition | MO contributions                       |
|--------------------|----|-------|-----------|----------|----|----------|----------|--------------------------------|------------|----------------------------------------|
| <b>E1</b><br>3.67* | 1  | 3.798 | 326       | 0.316    | 65 | 5.690    | 0.755    | 20.640                         | H→L        | TC (N1, Ar1, Ring1) To Ring 2          |
|                    | 3  | 4.217 | 294       | 0.435    | 67 | 4.202    | 0.628    | 12.674                         | H→L+1      | TC Ring Ar1 To Ring 1, IC in Ring 1    |
|                    | 8  | 4.961 | 249       | 0.015    | 50 | 4.329    | 0.623    | 12.944                         | H→L+3      | TC (N1, N2, Ar1 )To Ring2 ,IC in Ring1 |
|                    | 5  | 5.808 | 213       | 0.010    | 40 | 5.022    | 0.656    | 15.822                         | H-3→L      | TC Ring 1 To Ring 2 , IC in Ring 2     |
| <b>Z1</b><br>3.05* | 1  | 3.606 | 344       | 0.673    | 48 | 5.092    | 0.710    | 17.368                         | H→L        | TC Ring Ar1 To Ring2                   |
|                    | 6  | 4.556 | 272       | 0.023    | 74 | 4.551    | 0.705    | 15.419                         | H→L+1      | TC Ring Ar1 To Ring 1, IC in Ring 1    |
|                    | 10 | 5.337 | 232       | 0.054    | 42 | 5.029    | 0.574    | 13.870                         | H→L+2      | TC (N1,Ar1) To Ring 1, IC in Ring 1    |
|                    | 16 | 5.801 | 214       | 0.102    | 32 | 6.237    | 0.625    | 18.717                         | H-1→L      | TC Ar1 To Ring 2                       |
| <b>E2</b>          | 1  | 3.780 | 328       | 0.315    | 65 | 5.884    | 0.767    | 21.671                         | H→L        | TC ( N1,Ar2, Ring 1 )To Ring 2         |
|                    | 3  | 4.148 | 299       | 0.437    | 63 | 4.539    | 0.647    | 14.117                         | H→L+1      | TC Ring Ar2 To Ring1, IC in Ring 1     |
|                    | 5  | 4.770 | 260       | 0.105    | 72 | 1.637    | 0.542    | 4.285                          | H→L+4      | TC( N1,N2 , Ring 1) To Ar2, IC in Ar2  |
|                    | 15 | 5.817 | 213       | 0.012    | 39 | 4.652    | 0.633    | 14.142                         | H→3-L      | TC Ring 1 To Ring 2, IC in Ring 2      |
| <b>Z2</b>          | 1  | 3.477 | 357       | 0.727    | 46 | 5.477    | 0.676    | 17.771                         | H→L+1      | TC Ar2To Ring1                         |
|                    | 2  | 3.921 | 316       | 0.230    | 34 | 5.738    | 0.733    | 20.195                         | H→L        | TC Ar2To Ring2                         |
|                    | 4  | 4.423 | 280       | 0.016    | 79 | 5.250    | 0.784    | 19.775                         | H→L+2      | TC Ar2To Ring1                         |
|                    | 8  | 4.750 | 261       | 0.016    | 34 | 5.707    | 0.509    | 13.958                         | H-4→L      | TC Ring 3To Ring 2, IC in Ring 2       |
| <b>E3</b>          | 1  | 4.002 | 309       | 0.002    | 81 | 2.245    | 0.753    | 8.114                          | H-7→L      | IC in Ring 2                           |
|                    | 2  | 4.257 | 291       | 0.467    | 54 | 5.111    | 0.666    | 16.342                         | H→L        | TC (N1, Ar3,Ring 1) To Ring 2          |
|                    | 4  | 4.709 | 263       | 0.321    | 48 | 4.168    | 0.568    | 11.364                         | H→L+1      | TC Ar3To Ring 1, IC in Ring 1          |
|                    | 9  | 5.221 | 237       | 0.018    | 48 | 3.456    | 0.629    | 10.447                         | H→L+4      | TC (Ring 1 , N2) To Ar3,IC in Ar3      |
| <b>Z3</b>          | 1  | 3.873 | 319       | 0.662    | 58 | 5.239    | 0.669    | 16.830                         | H→L        | TC Ar3To Ring2                         |
|                    | 2  | 4.000 | 309       | 0.006    | 70 | 4.374    | 0.808    | 16.980                         | H-5→L      | IC in Ring 1                           |
|                    | 3  | 4.427 | 280       | 0.321    | 52 | 4.258    | 0.619    | 12.654                         | H→L+1      | TC Ar3To Ring 1, IC in Ring 1          |
|                    | 7  | 4.948 | 251       | 0.027    | 70 | 4.156    | 0.662    | 13.224                         | H→L+2      | TC ( N1, Ar3)To Ring 1                 |
| <b>E4</b>          | 1  | 3.931 | 315       | 0.463    | 50 | 4.771    | 0.666    | 15.252                         | H→L        | TC( N1 , Ar4, Ring 1)To Ring 2         |
|                    | 3  | 4.349 | 285       | 0.344    | 52 | 4.520    | 0.636    | 13.805                         | H→L+1      | TC Ar4 To Ring1 ,IC in Ring 1          |
|                    | 6  | 4.864 | 255       | 0.021    | 44 | 2.485    | 0.469    | 5.598                          | H-4→L      | IC in Ring 2                           |
|                    | 7  | 4.886 | 254       | 0.058    | 48 | 1.958    | 0.467    | 4.390                          | H→L+4      | TC (N1, N2), IC in Ar4                 |
| <b>Z4</b>          | 1  | 3.693 | 336       | 0.752    | 48 | 5.130    | 0.691    | 17.020                         | H→L        | TC (Ar4, Ring 1)To Ring 2              |
|                    | 3  | 4.250 | 292       | 0.279    | 44 | 5.136    | 0.610    | 15.054                         | H→L+1      | TC Ar4 To Ring1                        |
|                    | 6  | 4.694 | 264       | 0.025    | 70 | 4.367    | 0.671    | 14.075                         | H→L+2      | TC (N1, Ar4)To Ring 2, IC in Ring 1    |
|                    | 7  | 4.819 | 257       | 0.015    | 34 | 4.334    | 0.472    | 9.834                          | H-3→L      | TC Ring 1 To Ring 2, IC in Ring 2      |
| <b>E5</b>          | 1  | 3.945 | 314       | 0.697    | 50 | 4.366    | 0.612    | 12.832                         | H→L+1      | IC in Ring(Ar5,1)                      |
|                    | 3  | 4.331 | 286       | 0.231    | 52 | 5.542    | 0.695    | 18.509                         | H→L        | TC (N1, Ring (Ar5,1) )To Ring 2        |
|                    | 7  | 4.894 | 253       | 0.020    | 67 | 2.958    | 0.568    | 8.067                          | H-4→L      | IC in Ring 2                           |
|                    | 14 | 5.768 | 215       | 0.003    | 72 | 2.314    | 0.868    | 9.647                          | H→L+6      | TC (N1, N2, Ar5, R1)                   |
| <b>Z5</b>          | 1  | 3.655 | 339       | 0.879    | 52 | 5.600    | 0.688    | 18.496                         | H→L        | TC Ar5To Ring 2                        |
|                    | 2  | 4.000 | 309       | 0.004    | 65 | 4.401    | 0.786    | 16.608                         | H-6→L      | IC in Ring 2                           |
|                    | 3  | 4.297 | 288       | 0.272    | 46 | 5.177    | 0.636    | 15.819                         | H→L+1      | TC Ar5To Ring1                         |
|                    | 6  | 4.720 | 263       | 0.017    | 60 | 4.541    | 0.620    | 13.523                         | H-L+2      | TC N1, Ar5 To Ring1                    |
| <b>E6</b>          | 1  | 3.844 | 322       | 0.923    | 52 | 2.335    | 0.674    | 7.557                          | H→L+1      | TC N1, IC in Ring (Ar6,1)              |
|                    | 4  | 4.348 | 285       | 0.115    | 48 | 3.629    | 0.720    | 12.547                         | H→L        | TC( N1, Ring (Ar6,1) )To Ring2         |
|                    | 7  | 4.707 | 263       | 0.050    | 44 | 0.935    | 0.471    | 2.117                          | H→L+2      | IC in Ring (Ar6,1)                     |
|                    | 10 | 4.888 | 254       | 0.035    | 56 | 2.338    | 0.543    | 6.102                          | H-4→L      | IC in Ring2                            |

|                    |    |       |     |       |    |       |       |        |       |                                        |
|--------------------|----|-------|-----|-------|----|-------|-------|--------|-------|----------------------------------------|
| <b>Z6</b>          | 1  | 3.601 | 344 | 0.960 | 67 | 4.205 | 0.665 | 13.435 | H→L   | TC Ar6 To Ring 2, IC in Ar6            |
|                    | 2  | 4.000 | 309 | 0.002 | 50 | 5.670 | 0.830 | 22.603 | H-7→L | TC Ring 2To Ar6, IC in Ring 2          |
|                    | 4  | 4.350 | 285 | 0.283 | 50 | 3.099 | 0.633 | 9.427  | H→L+1 | TC (N1, Ar6)To Ring 2, IC in Rings     |
|                    | 8  | 4.598 | 269 | 0.062 | 67 | 0.953 | 0.618 | 2.830  | H→L+2 | (Ar6, 1)<br>IC in Rings (Ar6,1)        |
| <b>E7</b><br>3.85* | 1  | 3.971 | 312 | 0.314 | 42 | 3.549 | 0.670 | 11.426 | H→L   | TC(N1, Ar7)To Ring 2                   |
|                    | 3  | 4.413 | 281 | 0.366 | 56 | 4.348 | 0.619 | 12.933 | H→L+1 | TC Ar7 To Ring 1, IC in Ring 1         |
|                    | 7  | 4.850 | 256 | 0.012 | 40 | 2.725 | 0.519 | 6.787  | H-4→L | IC in Ring 2                           |
|                    | 8  | 5.058 | 245 | 0.016 | 50 | 3.465 | 0.558 | 9.280  | H→L+2 | TC( N1,N2, Ar7)To Ring 2, IC in Ring 1 |
| <b>Z7</b><br>3.20* | 1  | 3.751 | 330 | 0.696 | 50 | 5.250 | 0.695 | 17.516 | H→L   | TC Ring (Ar7, 1) To Ring 2             |
|                    | 2  | 4.002 | 309 | 0.005 | 74 | 3.075 | 0.743 | 10.977 | H-7→L | IC in Ring 2                           |
|                    | 3  | 4.223 | 294 | 0.282 | 48 | 4.829 | 0.656 | 15.224 | H→L+1 | TC Ar7, To Ring 1, IC in Ring1         |
|                    | 11 | 5.459 | 227 | 0.040 | 56 | 4.978 | 0.589 | 14.076 | H→L+3 | TC( N1,N2 , Ar7) To Ring 2             |
| <b>E8</b>          | 1  | 3.556 | 349 | 0.56  | 64 | 3.659 | 0.663 | 10.590 | H→L+1 | TC N1 , IC in Ring(Ar8, 1)             |
|                    | 2  | 3.961 | 313 | 0.026 | 37 | 3.303 | 0.652 | 10.338 | H→L   | TC Ring((Ar8,1),N1) To R2              |
|                    | 4  | 4.349 | 285 | 0.107 | 58 | 1.860 | 0.538 | 4.804  | H→L+2 | IC in Ring(Ar8,1)                      |
|                    | 10 | 4.957 | 250 | 0.017 | 56 | 4.248 | 0.652 | 13.310 | H→L+3 | TC (N1, N2 , Ar8) To Ring 2            |
| <b>Z8</b>          | 1  | 3.384 | 366 | 0.706 | 48 | 5.096 | 0.660 | 16.146 | H→L   | TC Ar8 To Ring2                        |
|                    | 4  | 4.170 | 297 | 0.057 | 87 | 2.493 | 0.638 | 7.647  | H→L+2 | IC in(Ar8, R1)                         |
|                    | 5  | 4.417 | 281 | 0.07  | 50 | 1.553 | 0.439 | 3.278  | H→L+4 | IC in Ar8, TC( N1,N2)                  |
|                    | 8  | 4.610 | 269 | 0.023 | 70 | 4.739 | 0.693 | 15.769 | H→L+3 | TC(Ar8 , N1 )TO Ring1                  |
| <b>E9</b>          | 1  | 3.537 | 351 | 0.441 | 72 | 2.002 | 0.566 | 5.440  | H→L+1 | IC in Ar9 and ring 1                   |
|                    | 3  | 4.128 | 300 | 0.054 | 54 | 5.575 | 0.665 | 17.798 | H→L   | TC( N1, Ring(Ar9 , 1 ))To Ring2        |
|                    | 4  | 4.397 | 281 | 0.546 | 60 | 3.057 | 0.503 | 7.384  | H→L+2 | IC in (Ar9, Ring1)                     |
|                    | 9  | 4.889 | 254 | 0.018 | 65 | 2.093 | 0.571 | 5.735  | H-4→L | IC in Ring2                            |
| <b>Z9</b>          | 1  | 3.364 | 369 | 0.638 | 74 | 4.519 | 0.562 | 12.204 | H→L   | TC Ar9 To Ring 2, IC in Ar9            |
|                    | 3  | 4.058 | 306 | 0.202 | 58 | 2.373 | 0.523 | 5.955  | H→L+2 | TC Ar9 To Ring 1, IC in Ar9            |
|                    | 8  | 4.665 | 266 | 0.017 | 67 | 4.960 | 0.634 | 15.099 | H→L+3 | TC( N1, Ar9) To Ring1                  |
|                    | 11 | 5.241 | 237 | 0.095 | 44 | 4.758 | 0.359 | 8.127  | H-2→L | TC Ar9 To Ring2, IC in Ring(Ar9,2)     |

|            | Sn | E(ev) | $\lambda$ | $f_{os}$ | %  | $d^{CT}$ | $q^{CT}$ | $\mu^{CT}$ | Type   | MO contributions                            |
|------------|----|-------|-----------|----------|----|----------|----------|------------|--------|---------------------------------------------|
| <b>E10</b> | 1  | 3.962 | 312       | 0.615    | 81 | 4.256    | 0.672    | 13.736     | H→L    | TC Ar1 To Ring 2, IC in Ring 1              |
|            | 2  | 4.471 | 277       | 0.162    | 81 | 4.358    | 0.698    | 14.612     | H→L+1  | TC(Ar1,N1) to Ring 2 ,IC in Ring 1          |
|            | 5  | 4.941 | 250       | 0.008    | 64 | 4.093    | 0.700    | 13.765     | H→L+2  | TC Ring (Ar10,N1,N2) to Ring 2,IC in Ring 1 |
|            | 16 | 6.146 | 201       | 0.013    | 42 | 1.137    | 0.449    | 2.454      | H-4→L  | IC in Ring (2,1)                            |
| <b>Z10</b> | 1  | 3.642 | 340       | 0.659    | 92 | 3.551    | 0.608    | 10.370     | H→L    | TC Ar1To Ring1 ,IC in Ring 1                |
|            | 2  | 4.435 | 279       | 0.345    | 84 | 5.058    | 0.767    | 18.636     | H→L+1  | TC Ring(Ar1,N1 )To Ring 2,IC in Ring 1      |
|            | 3  | 4.539 | 273       | 0.004    | 46 | 1.448    | 0.507    | 3.529      | H-3→L  | IC in Ring( 2 ,1)                           |
|            | 4  | 4.554 | 272       | 0.010    | 74 | 4.555    | 0.677    | 14.819     | H→L+2  | TC(Ar10 ,N1) To Ring1                       |
| <b>E11</b> | 1  | 3.883 | 319       | 0.609    | 82 | 4.562    | 0.690    | 15.111     | H→L    | TC (Ar2, N1 N2) To Ring 2                   |
|            | 2  | 4.437 | 279       | 0.2046   | 81 | 4.597    | 0.706    | 15.582     | H→L+1  | TC Ar2 To Ring 2                            |
|            | 3  | 4.758 | 260       | 0.100    | 67 | 1.273    | 0.564    | 3.452      | H→L+4  | TC (N1,N2) To Ar2,IC in Ar11                |
|            | 10 | 5.540 | 223       | 0.363    | 23 | 1.256    | 0.415    | 2.506      | H-3 →L | IC in Ring2                                 |
| <b>Z11</b> | 1  | 3.519 | 352       | 0.704    | 89 | 4.509    | 0.649    | 14.044     | H → L  | TC Ar2 to Ring 1                            |
|            | 2  | 4.294 | 288       | 0.327    | 79 | 5.682    | 0.796    | 21.728     | H→L+1  | TC (Ar2,N2 ) To Ring 2                      |
|            | 5  | 4.587 | 270       | 0.082    | 76 | 1.636    | 0.564    | 4.433      | H→L+5  | IC in Ar2,TC N2 To Ar2                      |
|            | 11 | 5.635 | 220       | 0.175    | 36 | 2.256    | 0.368    | 3.988      | H-4→L  | TC Ring 2 To Ring 1                         |
| <b>E12</b> | 1  | 4.370 | 283       | 0.634    | 84 | 3.651    | 0.601    | 10.543     | H →L   | TC Ar3 to Ring 2                            |
|            | 2  | 4.783 | 259       | 0.004    | 33 | 1.522    | 0.472    | 3.449      | H-1→L  | IC in Ring( 2 ,1)                           |
|            | 3  | 4.995 | 248       | 0.154    | 67 | 4.029    | 0.608    | 11.767     | H→L+1  | TC Ar3 to Ring 2, IC in Ring 1              |
|            | 4  | 5.116 | 242       | 0.018    | 36 | 3.591    | 0.451    | 7.782      | H→L+5  | TC (N1,N2 Ring 1) To Ar3, IC inAr12         |

|            |    |       |     |        |    |       |       |        |       |                                              |
|------------|----|-------|-----|--------|----|-------|-------|--------|-------|----------------------------------------------|
| <b>Z12</b> | 1  | 3.925 | 315 | 0.6271 | 92 | 3.078 | 0.561 | 8.291  | H→L   | TC Ar3 to Ring 1 , IC in Ring 1              |
|            | 2  | 4.573 | 271 | 0.002  | 46 | 0.542 | 0.511 | 1.332  | H-4→L | TC(Ar3,N1 ,N2) To Ring 2                     |
|            | 3  | 4.735 | 261 | 0.437  | 79 | 4.248 | 0.689 | 14.062 | H→L+1 | TC from Ar3 to the Rings and IC in the rings |
|            | 4  | 4.881 | 254 | 0.008  | 65 | 3.905 | 0.637 | 11.954 | H→L+2 | TC (N1, Ar3 ) to Ring 1                      |
| <b>E13</b> | 1  | 4.044 | 306 | 0.754  | 87 | 3.666 | 0.611 | 10.755 | H→L   | IC in Ring 1,TC Ar13To Ring 2                |
|            | 2  | 4.652 | 266 | 0.130  | 84 | 4.527 | 0.722 | 15.692 | H→L+1 | TC Ar4 to Ring 2                             |
|            | 3  | 4.806 | 257 | 0.002  | 35 | 2.388 | 0.513 | 5.878  | H-1→L | IC in Ring 2, Ring 1                         |
|            | 4  | 4.877 | 254 | 0.059  | 60 | 1.827 | 0.507 | 4.451  | H→L+4 | IC in Ar4,TC (N1,N2)                         |
| <b>Z13</b> | 1  | 3.718 | 333 | 0.743  | 92 | 3.242 | 0.587 | 9.146  | H→L   | TC Ar4 To Ring 1,IC in Ring 1                |
|            | 3  | 4.611 | 268 | 0.361  | 79 | 5.045 | 0.736 | 17.826 | H→L+1 | TC (Ar4,N1, N2)To Ring2,IC in Ring 1         |
|            | 4  | 4.710 | 263 | 0.013  | 79 | 4.510 | 0.725 | 15.701 | H→L+2 | TC(Ar4,N1)To Ring 1 ,IC in Ring 1            |
|            | 14 | 5.948 | 208 | 0.053  | 56 | 4.277 | 0.509 | 10.465 | H-2→L | TC Ar4 To Ring 1,IC in Ring 1                |
| <b>E14</b> | 1  | 3.998 | 310 | 0.934  | 98 | 3.368 | 0.566 | 9.165  | H→L   | TC Ar5 To Ring 2                             |
|            | 2  | 4.677 | 265 | 0.109  | 84 | 4.987 | 0.765 | 18.335 | H→L+1 | TC (Ar5, N1,N2) To Ring 2                    |
|            | 8  | 5.342 | 232 | 0.218  | 32 | 0.774 | 0.409 | 1.522  | H→L+3 | IC In(Ar5, Ring 1)                           |
|            | 13 | 5.835 | 212 | 0.032  | 32 | 0.369 | 0.377 | 0.667  | H-1→L | TC Ring 1 To Ring 2 ,IC in Ring 2            |
| <b>Z14</b> | 1  | 3.671 | 337 | 0.867  | 92 | 3.374 | 0.578 | 9.365  | H→L   | TC Ar5 To Ring 1                             |
|            | 3  | 4.617 | 268 | 0.360  | 74 | 5.310 | 0.719 | 18.344 | H→L+1 | TC (Ar5, N1,N2) To Ring 2,IC in Ring 1       |
|            | 7  | 5.293 | 234 | 0.129  | 56 | 2.208 | 0.441 | 4.673  | H→L+3 | IC in Ar5                                    |
|            | 9  | 5.568 | 222 | 0.047  | 52 | 2.829 | 0.417 | 5.662  | H-1→L | TC(Ar5, Ring2 )To Ring1                      |
| <b>E15</b> | 1  | 3.879 | 319 | 1.013  | 89 | 2.666 | 0.599 | 7.676  | H→L   | IC in Ring(Ar6,1) and TC(N1 )                |
|            | 4  | 4.628 | 267 | 0.023  | 64 | 3.126 | 0.691 | 10.378 | H→L+1 | TC Ring(Ar6,1) To Ring 2                     |
|            | 7  | 4.899 | 253 | 0.113  | 46 | 0.604 | 0.481 | 1.395  | H→L+2 | IC in Ring 1,TC Ar6 to Ring 2                |
|            | 15 | 5.820 | 213 | 0.015  | 32 | 2.322 | 0.462 | 5.159  | H-2→L | IC in Ring (Ar6,1) TC N1                     |
| <b>Z15</b> | 1  | 3.617 | 342 | 0.958  | 92 | 0.390 | 0.558 | 1.046  | H→L   | IC in Ring(Ar6,1)                            |
|            | 4  | 4.555 | 272 | 0.149  | 50 | 1.312 | 0.498 | 3.141  | H→L+1 | IC in Ring(Ar6,1) , TC Ring 2                |
|            | 12 | 5.577 | 222 | 0.022  | 36 | 3.674 | 0.398 | 7.030  | H-1→L | TC Ring 2 To Ring 1, IC in Ar6               |
|            | 15 | 5.758 | 215 | 0.042  | 40 | 3.871 | 0.446 | 8.286  | H→L+4 | TC (Ar6,N1 ,N2)To Ring 2, IC in Ring1        |
| <b>E16</b> | 1  | 4.092 | 302 | 0.690  | 89 | 3.749 | 0.589 | 10.600 | H→L   | IC in Ring 1, TC Ar7 to Ring 2               |
|            | 2  | 4.702 | 263 | 0.189  | 79 | 4.377 | 0.649 | 13.646 | H→L+1 | IC in Ring 1, TC Ar7 to Ring 2               |
|            | 3  | 4.789 | 258 | 0.028  | 60 | 0.633 | 0.541 | 1.645  | H→L+3 | TC( N1,N2) , IC in (Ar7, Ring1)              |
|            | 4  | 4.810 | 257 | 0.004  | 32 | 1.828 | 0.435 | 3.820  | H-1→L | IC in Ring( 2 , 1)                           |
| <b>Z16</b> | 1  | 3.794 | 326 | 0.689  | 89 | 3.449 | 0.574 | 9.507  | H→L   | TC Ar7 to Ring1, IC in Ring2                 |
|            | 2  | 4.526 | 273 | 0.012  | 42 | 2.926 | 0.556 | 7.812  | H-2→L | TC Ar7 to Ring 2 , IC in Ring 1              |
|            | 3  | 4.571 | 271 | 0.356  | 81 | 4.820 | 0.709 | 16.407 | H→L+1 | TC(Ar7,N1,N2)to Ring 2,IC in Ring 1          |
|            | 4  | 4.729 | 262 | 0.007  | 76 | 4.129 | 0.680 | 13.497 | H→L+2 | TC(Ar7,N1,N2 )to Ring 1,IC in Ring 1         |
| <b>E17</b> | 1  | 3.580 | 346 | 0.604  | 92 | 1.803 | 0.542 | 4.694  | H→L   | IC in (Ar8, Ring 1)                          |
|            | 2  | 4.177 | 296 | 0.043  | 67 | 3.761 | 0.689 | 12.442 | H→L+1 | TC Ring 1 To Ring 2,IC in Ar8                |
|            | 4  | 4.583 | 270 | 0.227  | 62 | 2.911 | 0.627 | 8.773  | H→L+2 | TC Ar8 to Ring 1,IC in Ring 1                |
|            | 13 | 5.518 | 224 | 0.028  | 48 | 1.804 | 0.329 | 2.854  | H-1→L | TC Ar8 to Ring 1,IC in Ar17                  |
| <b>Z17</b> | 1  | 3.409 | 363 | 0.6803 | 92 | 2.480 | 0.552 | 6.575  | H→L   | TC Ar8 to Ring 2, IC in Ar17                 |
|            | 2  | 4.148 | 298 | 0.028  | 84 | 2.400 | 0.639 | 7.362  | H→L+2 | TC Ar8 to Ring 1 ,IC in Ar17                 |
|            | 4  | 4.426 | 280 | 0.299  | 64 | 4.405 | 0.627 | 13.275 | H→L+1 | TC (Ar8 ,N1,N2) to Ring 2                    |
|            | 5  | 4.475 | 277 | 0.006  | 56 | 0.531 | 0.634 | 1.617  | H-3→L | IC in (Ring 1, Ar8)                          |
| <b>E18</b> | 1  | 3.540 | 350 | 0.430  | 92 | 3.120 | 0.509 | 7.629  | H→L   | TC N1, IC in(Ar9, Ring 1)                    |
|            | 2  | 4.321 | 286 | 0.507  | 48 | 3.843 | 0.556 | 10.249 | H→L+2 | IC in Ring 1,TC Ar9 to Ring 1                |
|            | 3  | 4.577 | 270 | 0.155  | 58 | 1.661 | 0.413 | 3.298  | H-1→L | TC N1, IC in (Ar9, Ring1)                    |
|            | 12 | 5.514 | 224 | 0.196  | 46 | 2.278 | 0.368 | 4.028  | H-2→L | TC Ring 1 to Ar9,IC in Ar9                   |
| <b>Z18</b> | 1  | 3.383 | 366 | 0.626  | 92 | 0.740 | 0.502 | 1.783  | H→L   | IC in Ar9                                    |
|            | 2  | 4.068 | 304 | 0.169  | 79 | 0.805 | 0.520 | 2.012  | H→L+1 | IC in(Ar9, Ring 1)                           |
|            | 5  | 4.579 | 270 | 0.324  | 72 | 5.238 | 0.726 | 18.272 | H→L+2 | TC (Ar9, N1,N2) to Ring2,IC in Ring 1        |
|            | 9  | 5.298 | 233 | 0.043  | 46 | 1.804 | 0.405 | 3.510  | H-2→L | TC Ring 2 To Ring 1, IC in Ar9               |

\*The experimental values were derived from  $\lambda_{\max}$  values obtained by measurements in toluene<sup>1</sup>.

$\Delta\mu_{0 \rightarrow n}$  : is equal to the difference between the dipole moments calculated for the ground and excited states is calculated by using this  $(\Delta\mu_{0 \rightarrow n} = q^{CT} \times d^{CT})^2$

**Table S4.** Second harmonic generation ( $\beta_{SHG}^\lambda \equiv \beta(-2\omega; \omega, \omega)$ , a.u.), electrooptic Pockels effect ( $\beta_{EOPE}^\lambda \equiv \beta(-\omega; \omega, 0)$ , a.u.), dynamic hyper-Rayleigh scattering ( $\beta_{HRS}^\lambda$ , a. u.) and depolarization ratio  $DR^\lambda$  of E<sub>i</sub> and Z<sub>i</sub> (i=1 to 18) compounds ( $\lambda = 695, 1064$  and  $1340$  nm)

|    | $\beta_{SHG}^{\lambda=695}$  | $\beta_{EOPE}^{\lambda=695}$  | $\beta_{HRS}^{\lambda=695}$  | $DR^{695}$  |    | $\beta_{SHG}^{\lambda=695}$  | $\beta_{EOPE}^{\lambda=695}$  | $\beta_{HRS}^{\lambda=695}$  | $DR^{695}$  |     | $\beta_{SHG}^{\lambda=695}$  | $\beta_{EOPE}^{\lambda=695}$  | $\beta_{HRS}^{\lambda=695}$  | $DR^{695}$  |     | $\beta_{SHG}^{\lambda=695}$  | $\beta_{EOPE}^{\lambda=695}$  | $\beta_{HRS}^{\lambda=695}$  | $DR^{695}$  |
|----|------------------------------|-------------------------------|------------------------------|-------------|----|------------------------------|-------------------------------|------------------------------|-------------|-----|------------------------------|-------------------------------|------------------------------|-------------|-----|------------------------------|-------------------------------|------------------------------|-------------|
| E1 | 25075                        | 2851                          | 10110                        | 4.057       | Z1 | 337631                       | 7093                          | 142527                       | 2.799       | E10 | 16246                        | 2583                          | 6706                         | 4.613       | Z10 | 128929                       | 4798                          | 53105                        | 3.640       |
| E2 | 31810                        | 3828                          | 12826                        | 4.363       | Z2 | 186223                       | 12101                         | 83184                        | 2.316       | E11 | 25820                        | 3662                          | 10518                        | 4.663       | Z11 | 286677                       | 9137                          | 120302                       | 3.606       |
| E3 | 5303                         | 1545                          | 2148                         | 4.571       | Z3 | 29683                        | 4811                          | 11983                        | 4.036       | E12 | 3885                         | 1252                          | 1622                         | 4.447       | Z12 | 16610                        | 3019                          | 6616                         | 4.171       |
| E4 | 13900                        | 1944                          | 5631                         | 4.160       | Z4 | 84890                        | 5402                          | 34862                        | 3.326       | E13 | 10502                        | 1743                          | 4392                         | 4.390       | Z13 | 52331                        | 3382                          | 21375                        | 3.896       |
| E5 | 10702                        | 771                           | 4575                         | 3.572       | Z5 | 120788                       | 4346                          | 50083                        | 3.134       | E14 | 8784                         | 1034                          | 3929                         | 3.643       | Z14 | 80569                        | 2545                          | 33158                        | 3.650       |
| E6 | 15368                        | 2888                          | 7521                         | 3.546       | Z6 | 65892                        | 2154                          | 45757                        | 0.612       | E15 | 19273                        | 3477                          | 8750                         | 4.020       | Z15 | 14518                        | 2003                          | 18306                        | 0.720       |
| E7 | 11730                        | 1802                          | 4749                         | 4.198       | Z7 | 57049                        | 5115                          | 23460                        | 3.454       | E16 | 8837                         | 1610                          | 3695                         | 4.447       | Z16 | 31400                        | 3104                          | 12705                        | 3.842       |
| E8 | 183181                       | 2532                          | 83555                        | 1.776       | Z8 | 33853                        | 7461                          | 18530                        | 1.020       | E17 | 161806                       | 2266                          | 70219                        | 2.403       | Z17 | 24526                        | 4349                          | 11930                        | 1.573       |
| E9 | 90612                        | 1028                          | 40594                        | 4.087       | Z9 | 6955                         | 4742                          | 8620                         | 0.174       | E18 | 124164                       | 1781                          | 54949                        | 4.220       | Z18 | 7393                         | 2191                          | 4304                         | 0.769       |
|    | $\beta_{SHG}^{\lambda=1064}$ | $\beta_{EOPE}^{\lambda=1064}$ | $\beta_{HRS}^{\lambda=1064}$ | $DR^{1064}$ |    | $\beta_{SHG}^{\lambda=1064}$ | $\beta_{EOPE}^{\lambda=1064}$ | $\beta_{HRS}^{\lambda=1064}$ | $DR^{1064}$ |     | $\beta_{SHG}^{\lambda=1064}$ | $\beta_{EOPE}^{\lambda=1064}$ | $\beta_{HRS}^{\lambda=1064}$ | $DR^{1064}$ |     | $\beta_{SHG}^{\lambda=1064}$ | $\beta_{EOPE}^{\lambda=1064}$ | $\beta_{HRS}^{\lambda=1064}$ | $DR^{1064}$ |
| E1 | 3438                         | 2027                          | 1469                         | 4.350       | Z1 | 8736                         | 4921                          | 3505                         | 5.299       | E10 | 3077                         | 1876                          | 1334                         | 4.283       | Z10 | 5894                         | 3342                          | 2320                         | 5.605       |
| E2 | 4562                         | 2795                          | 1879                         | 4.921       | Z2 | 15113                        | 8299                          | 5885                         | 5.975       | E11 | 4353                         | 2684                          | 1791                         | 4.986       | Z11 | 11289                        | 6376                          | 4374                         | 6.102       |
| E3 | 1751                         | 1228                          | 763                          | 4.112       | Z3 | 5646                         | 3611                          | 2274                         | 5.260       | E12 | 1405                         | 1016                          | 614                          | 4.118       | Z12 | 3502                         | 2322                          | 1374                         | 5.662       |
| E4 | 2346                         | 1378                          | 1078                         | 3.590       | Z4 | 6591                         | 3796                          | 2658                         | 5.157       | E13 | 2077                         | 1267                          | 960                          | 3.656       | Z13 | 4157                         | 2348                          | 1637                         | 5.486       |
| E5 | 1042                         | 440                           | 847                          | 1.914       | Z5 | 5473                         | 2878                          | 2288                         | 4.506       | E14 | 1240                         | 785                           | 830                          | 2.260       | Z14 | 3325                         | 1561                          | 1384                         | 4.398       |
| E6 | 3325                         | 2250                          | 1811                         | 2.837       | Z6 | 2440                         | 1732                          | 1873                         | 2.027       | E15 | 4024                         | 2680                          | 1959                         | 3.419       | Z15 | 2216                         | 1662                          | 1544                         | 2.212       |
| E7 | 2175                         | 1269                          | 1004                         | 3.562       | Z7 | 6208                         | 3613                          | 2566                         | 4.816       | E16 | 1915                         | 1170                          | 886                          | 3.654       | Z16 | 3770                         | 2189                          | 1531                         | 4.972       |
| E8 | 3066                         | 1806                          | 1370                         | 3.752       | Z8 | 9379                         | 5066                          | 3826                         | 4.907       | E17 | 2697                         | 1662                          | 1224                         | 3.733       | Z17 | 5394                         | 3018                          | 2163                         | 5.004       |
| E9 | 1239                         | 769                           | 1188                         | 1.816       | Z9 | 5863                         | 3273                          | 2603                         | 3.729       | E18 | 2124                         | 1334                          | 1353                         | 2.379       | Z18 | 2712                         | 1498                          | 1274                         | 3.035       |
|    | $\beta_{SHG}^{\lambda=1340}$ | $\beta_{EOPE}^{\lambda=1340}$ | $\beta_{HRS}^{\lambda=1340}$ | $DR^{1340}$ |    | $\beta_{SHG}^{\lambda=1340}$ | $\beta_{EOPE}^{\lambda=1340}$ | $\beta_{HRS}^{\lambda=1340}$ | $DR^{1340}$ |     | $\beta_{SHG}^{\lambda=1340}$ | $\beta_{EOPE}^{\lambda=1340}$ | $\beta_{HRS}^{\lambda=1340}$ | $DR^{1340}$ |     | $\beta_{SHG}^{\lambda=1340}$ | $\beta_{EOPE}^{\lambda=1340}$ | $\beta_{HRS}^{\lambda=1340}$ | $DR^{1340}$ |
| E1 | 2531                         | 1858                          | 1116                         | 4.065       | Z1 | 6239                         | 4490                          | 2530                         | 5.242       | E10 | 2310                         | 1730                          | 1025                         | 4.056       | Z10 | 4226                         | 3054                          | 1677                         | 5.616       |
| E2 | 3429                         | 2582                          | 1430                         | 4.794       | Z2 | 19593                        | 7564                          | 4123                         | 6.162       | E11 | 3284                         | 2482                          | 1362                         | 4.905       | Z11 | 8046                         | 5837                          | 3106                         | 6.380       |
| E3 | 1426                         | 1159                          | 634                          | 3.970       | Z3 | 4351                         | 3360                          | 1763                         | 5.263       | E12 | 1163                         | 964                           | 515                          | 4.026       | Z12 | 2752                         | 2176                          | 1086                         | 5.738       |
| E4 | 1725                         | 1262                          | 839                          | 3.258       | Z4 | 4773                         | 3474                          | 1954                         | 5.043       | E13 | 1559                         | 1168                          | 753                          | 3.359       | Z13 | 2975                         | 2144                          | 1188                         | 5.411       |
| E5 | 633                          | 387                           | 696                          | 1.720       | Z5 | 3762                         | 2594                          | 1641                         | 4.136       | E14 | 932                          | 742                           | 692                          | 2.087       | Z14 | 2148                         | 1378                          | 963                          | 3.769       |
| E6 | 2646                         | 2114                          | 1471                         | 2.733       | Z6 | 1996                         | 1639                          | 1526                         | 2.035       | E15 | 3174                         | 2510                          | 1574                         | 3.269       | Z15 | 1881                         | 1583                          | 1287                         | 2.217       |
| E7 | 1596                         | 1158                          | 783                          | 3.211       | Z7 | 4529                         | 3310                          | 1906                         | 4.653       | E16 | 1441                         | 1078                          | 698                          | 3.347       | Z16 | 2747                         | 2005                          | 1141                         | 4.759       |
| E8 | 2250                         | 1658                          | 1050                         | 3.512       | Z8 | 6511                         | 4604                          | 2684                         | 4.913       | E17 | 2034                         | 1537                          | 952                          | 3.540       | Z17 | 3824                         | 2758                          | 1553                         | 5.054       |
| E9 | 926                          | 719                           | 939                          | 1.777       | Z9 | 4164                         | 2983                          | 1890                         | 3.707       | E18 | 1607                         | 1245                          | 1052                         | 2.294       | Z18 | 1917                         | 1363                          | 948                          | 2.996       |

**Table S5.** Static and dynamic  $\beta_{ji}$  values of Ei and Zi (i=1 to 18) compounds

|     | static        |               |               |               | 695           |               |               |               | 1064          |               |               |               | 1340          |               |      |      |      |
|-----|---------------|---------------|---------------|---------------|---------------|---------------|---------------|---------------|---------------|---------------|---------------|---------------|---------------|---------------|------|------|------|
|     | $\beta_{j=1}$ | $\beta_{j=3}$ |      |      |      |
| E1  | 1245          | 1545          | 17611         | 18700         | 2626          | 2562          | 1945          | 2061          | Z1            | 3026          | 2477          | 204135        | 340680        | 6668          | 5027 | 4798 | 3672 |
| E2  | 1740          | 1637          | 22956         | 22311         | 3499          | 2918          | 2642          | 2280          | Z2            | 5034          | 2904          | 101060        | 220963        | 11547         | 7251 | 8149 | 4856 |
| E3  | 793           | 948           | 3908          | 3584          | 1337          | 1397          | 1095          | 1193          | Z3            | 2296          | 1805          | 20831         | 22257         | 4318          | 3289 | 3348 | 2548 |
| E4  | 815           | 1431          | 9903          | 10204         | 1782          | 2189          | 1321          | 1823          | Z4            | 2308          | 2087          | 55484         | 74690         | 5018          | 3929 | 3665 | 2958 |
| E5  | 241           | 1733          | 7544          | 9326          | 781           | 2471          | 485           | 2132          | Z5            | 1705          | 2214          | 77130         | 111609        | 4142          | 3868 | 2880 | 2988 |
| E6  | 1494          | 2742          | 12359         | 15413         | 2618          | 4293          | 2071          | 3567          | Z6            | 1185          | 3267          | -             | 195299        | 1915          | 5319 | 1569 | 4325 |
| E7  | 771           | 1353          | 8381          | 8539          | 1654          | 2051          | 1223          | 1719          | Z7            | 2245          | 2225          | 38061         | 48976         | 4747          | 4072 | 3486 | 3126 |
| E8  | 1120          | 1635          | 64585         | 252138        | 2311          | 2695          | 1718          | 2168          | Z8            | 3075          | 2714          | -             | 68901         | 7119          | 5959 | 4995 | 4175 |
| E9  | 495           | 2103          | 70911         | 74630         | 974           | 3551          | 726           | 2835          | Z9            | 1990          | 2576          | -             | 44210         | 4378          | 5143 | 3171 | 3751 |
|     | static        |               |               |               | 695           |               |               |               | 1064          |               |               |               | 1340          |               |      |      |      |
|     | $\beta_{j=1}$ | $\beta_{j=3}$ |      |      |      |
| E10 | 1169          | 1410          | 12233         | 11093         | 2373          | 2360          | 1786          | 1897          | Z10           | 2038          | 1506          | 88339         | 106782        | 4481          | 3112 | 3240 | 2244 |
| E11 | 1670          | 1495          | 19256         | 17221         | 3348          | 2743          | 2534          | 2123          | Z11           | 3886          | 1996          | 199264        | 243547        | 8625          | 5228 | 6188 | 3462 |
| E12 | 654           | 759           | 2923          | 2775          | 1076          | 1122          | 895           | 959           | Z12           | 1472          | 1009          | 11648         | 11962         | 2661          | 1820 | 2110 | 1413 |
| E13 | 764           | 1258          | 7879          | 7599          | 1600          | 1925          | 1205          | 1604          | Z13           | 1402          | 1194          | 36628         | 40830         | 3145          | 2255 | 2273 | 1663 |
| E14 | 529           | 1584          | 6538          | 7895          | 982           | 2233          | 739           | 1937          | Z14           | 857           | 1504          | 55225         | 66545         | 2484          | 2390 | 1628 | 1888 |
| E15 | 1776          | 2620          | 15185         | 16305         | 3162          | 4119          | 2482          | 3412          | Z15           | 1153          | 2704          | -             | 75130         | 1781          | 4200 | 1488 | 3497 |
| E16 | 725           | 1171          | 6658          | 6319          | 1477          | 1778          | 1115          | 1490          | Z16           | 1342          | 1348          | 21643         | 24533         | 2859          | 2352 | 2103 | 1832 |
| E17 | 1037          | 1466          | 88609         | 182899        | 2059          | 2415          | 1564          | 1955          | Z17           | 1851          | 1584          | 4907          | 37924         | 4048          | 3301 | 2915 | 2346 |
| E18 | 872           | 2059          | 97161         | 98367         | 1690          | 3543          | 1265          | 2808          | Z18           | 898           | 1581          | -             | 17373         | 1925          | 2898 | 1421 | 2176 |



**Table S6.** The frequency dispersion factor between static and dynamic ( $\beta_{HRS}^\lambda/\beta_{HRS}^\infty$ )

| Dynamic/static              |         | Dynamic/static |        | Dynamic/static |        | Dynamic/static |        |
|-----------------------------|---------|----------------|--------|----------------|--------|----------------|--------|
| $\lambda = 695 \text{ nm}$  |         |                |        |                |        |                |        |
| E1                          | 13.373  | Z1             | 88.088 | E10            | 9.552  | Z10            | 49.77  |
| E2                          | 13.318  | Z2             | 32.801 | E11            | 11.53  | Z11            | 62.235 |
| E3                          | 4.531   | Z3             | 9.846  | E12            | 4.191  | Z12            | 8.705  |
| E4                          | 9.625   | Z4             | 27.580 | E13            | 8.302  | Z13            | 28.236 |
| E5                          | 8.379   | Z5             | 47.472 | E14            | 7.169  | Z14            | 53.915 |
| E6                          | 6.831   | Z6             | 39.719 | E15            | 7.517  | Z15            | 18.37  |
| E7                          | 8.587   | Z7             | 18.604 | E16            | 7.434  | Z16            | 16.783 |
| E8                          | 114.458 | Z8             | 11.069 | E17            | 105.43 | Z17            | 11.930 |
| E9                          | 58.917  | Z9             | 7.008  | E18            | 72.58  | Z18            | 6.662  |
| $\lambda = 1064 \text{ nm}$ |         |                |        |                |        |                |        |
| E1                          | 4.35    | Z1             | 2.166  | E10            | 1.90   | Z10            | 2.174  |
| E2                          | 4.92    | Z2             | 2.320  | E11            | 1.963  | Z11            | 2.262  |
| E3                          | 4.112   | Z3             | 1.868  | E12            | 1.586  | Z12            | 1.807  |
| E4                          | 3.59    | Z4             | 2.102  | E13            | 1.814  | Z13            | 2.162  |
| E5                          | 1.914   | Z5             | 2.168  | E14            | 1.514  | Z14            | 2.250  |
| E6                          | 2.837   | Z6             | 1.625  | E15            | 1.682  | Z15            | 1.550  |
| E7                          | 3.562   | Z7             | 2.034  | E16            | 1.782  | Z16            | 2.022  |
| E8                          | 3.752   | Z8             | 2.285  | E17            | 1.837  | Z17            | 2.163  |
| E9                          | 1.816   | Z9             | 2.116  | E18            | 1.787  | Z18            | 1.972  |
| $\lambda = 1340 \text{ nm}$ |         |                |        |                |        |                |        |
| E1                          | 4.065   | Z1             | 1.563  | E10            | 1.460  | Z10            | 1.571  |
| E2                          | 4.794   | Z2             | 1.625  | E11            | 1.493  | Z11            | 1.606  |
| E3                          | 3.970   | Z3             | 1.448  | E12            | 1.330  | Z12            | 1.428  |
| E4                          | 3.258   | Z4             | 1.545  | E13            | 1.423  | Z13            | 1.569  |
| E5                          | 1.72    | Z5             | 1.555  | E14            | 1.262  | Z14            | 1.565  |
| E6                          | 2.733   | Z6             | 1.324  | E15            | 1.352  | Z15            | 1.292  |
| E7                          | 3.211   | Z7             | 1.511  | E16            | 1.404  | Z16            | 1.507  |
| E8                          | 3.512   | Z8             | 1.603  | E17            | 1.429  | Z17            | 1.55   |
| E9                          | 1.777   | Z9             | 1.536  | E18            | 1.389  | Z18            | 1.467  |

## The optimized cartesian coordinates and energy of all structures

### E1

|   |             |             |             |
|---|-------------|-------------|-------------|
| C | 0.23519500  | 1.02422400  | 0.03496000  |
| N | 1.42711300  | 0.54333000  | 0.03678100  |
| N | 1.62234300  | -0.77241400 | 0.01017900  |
| H | 0.83202200  | -1.39924600 | -0.07850700 |
| C | 2.90830800  | -1.31327600 | -0.02688600 |
| C | 3.04425300  | -2.69724100 | -0.15665400 |
| C | 4.04694600  | -0.51307900 | 0.07139300  |
| C | 4.30641000  | -3.27132300 | -0.18991800 |
| C | 5.30319200  | -1.10265700 | 0.03436900  |
| H | 3.93799500  | 0.55845400  | 0.17784900  |
| C | 5.44584600  | -2.47959100 | -0.09619600 |
| H | 4.39810000  | -4.34750600 | -0.29367300 |
| H | 6.18328700  | -0.47205200 | 0.11025200  |
| H | 6.43129800  | -2.93095700 | -0.12433800 |
| C | -0.98990500 | 0.17264400  | 0.02634500  |
| C | -1.78637500 | 0.09142200  | -1.11597900 |
| C | -1.32975300 | -0.57485200 | 1.15471200  |
| C | -2.90812100 | -0.72167900 | -1.13709300 |
| H | -1.53109300 | 0.67921100  | -1.99034900 |
| C | -2.45164600 | -1.39105200 | 1.15110500  |
| H | -0.71707300 | -0.50774200 | 2.04763600  |
| C | -3.22134800 | -1.45063500 | 0.00043900  |
| H | -3.53844500 | -0.79294400 | -2.01381700 |
| H | -2.73330200 | -1.96923700 | 2.02140900  |
| C | 0.08304000  | 2.49768900  | 0.03706300  |
| C | 1.19009900  | 3.34644700  | -0.07273000 |

|    |             |             |             |
|----|-------------|-------------|-------------|
| N  | -1.16555900 | 2.95731700  | 0.15061300  |
| C  | 0.98038000  | 4.71292100  | -0.05384100 |
| H  | 2.18217600  | 2.92472300  | -0.17243100 |
| C  | -1.35077900 | 4.27603500  | 0.16575800  |
| C  | -0.31858100 | 5.19721200  | 0.06917400  |
| H  | 1.81877900  | 5.39693000  | -0.13653400 |
| H  | -2.38139500 | 4.60742000  | 0.26183600  |
| H  | -0.52663500 | 6.26084700  | 0.08786700  |
| N  | -4.41486700 | -2.31718300 | -0.01429000 |
| O  | -4.65757800 | -2.95884900 | 0.98847200  |
| O  | -5.08268900 | -2.33860900 | -1.02884600 |
| H  | 2.16024200  | -3.32484100 | -0.23332300 |
| Z1 |             |             |             |
| C  | 0.13551200  | 0.60376000  | -0.01443000 |
| N  | 1.06232000  | -0.30094100 | 0.00153000  |
| N  | 2.34587000  | -0.00615800 | 0.04216100  |
| H  | 2.61428800  | 0.96399000  | 0.18621100  |
| C  | 3.30508800  | -1.02197300 | 0.05517100  |
| C  | 4.64925100  | -0.65751200 | 0.15715600  |
| C  | 2.95791600  | -2.37012700 | -0.03529900 |
| C  | 5.63464400  | -1.63379300 | 0.17000100  |
| C  | 3.95500500  | -3.33549100 | -0.02171100 |
| H  | 1.91387900  | -2.64678600 | -0.10932700 |
| C  | 5.29586300  | -2.97948500 | 0.07988700  |
| H  | 6.67561200  | -1.33843700 | 0.25259000  |
| H  | 3.67742500  | -4.38238000 | -0.09190500 |
| H  | 6.06724100  | -3.74151100 | 0.08983600  |
| C  | -1.24516800 | 0.04924100  | -0.01061800 |
| C  | -1.57016800 | -1.03359500 | -0.83203000 |

|    |             |             |             |
|----|-------------|-------------|-------------|
| C  | -2.22379600 | 0.56137400  | 0.84743200  |
| C  | -2.83787500 | -1.59128100 | -0.80632200 |
| H  | -0.81473900 | -1.43724200 | -1.49579400 |
| C  | -3.49555200 | 0.01403500  | 0.88702700  |
| H  | -1.98265100 | 1.38669200  | 1.50886500  |
| C  | -3.78530600 | -1.05584100 | 0.05371000  |
| H  | -3.10015700 | -2.42525500 | -1.44434400 |
| H  | -4.25304800 | 0.39632400  | 1.55860400  |
| C  | 0.33704200  | 2.07038000  | -0.06671700 |
| C  | -0.67992900 | 2.92312500  | -0.52089200 |
| N  | 1.54057900  | 2.55461000  | 0.28393700  |
| C  | -0.44683900 | 4.28502300  | -0.57981000 |
| H  | -1.63304100 | 2.51687300  | -0.83469800 |
| C  | 1.75070800  | 3.86849700  | 0.22541700  |
| C  | 0.79231900  | 4.77907900  | -0.18829000 |
| H  | -1.22275400 | 4.95596100  | -0.93305500 |
| H  | 2.74081700  | 4.20230400  | 0.52317100  |
| H  | 1.01505800  | 5.83917600  | -0.21508600 |
| N  | -5.13596900 | -1.63879600 | 0.08304900  |
| O  | -5.94677800 | -1.14869400 | 0.84529000  |
| O  | -5.36318900 | -2.57574300 | -0.65728800 |
| H  | 4.91993000  | 0.39229400  | 0.22808600  |
| E2 |             |             |             |
| C  | 0.71910700  | 1.16177900  | -0.06379400 |
| N  | -0.55565900 | 1.00856700  | -0.12905900 |
| N  | -1.08358400 | -0.21182200 | -0.14964700 |
| H  | -0.48502700 | -1.02270800 | -0.05236300 |
| C  | -2.46762700 | -0.40220900 | -0.16711200 |
| C  | -2.96425900 | -1.70351100 | -0.07794700 |

|   |             |             |             |
|---|-------------|-------------|-------------|
| C | -3.35632500 | 0.66602500  | -0.28546100 |
| C | -4.33175000 | -1.93359800 | -0.10066300 |
| C | -4.72278700 | 0.42685800  | -0.30721800 |
| H | -2.97038300 | 1.67399200  | -0.36763500 |
| C | -5.21729600 | -0.86890200 | -0.21373200 |
| H | -4.72201800 | -2.94401800 | -0.04022800 |
| H | -5.42020000 | 1.25161600  | -0.41243900 |
| C | 1.67374500  | 0.01540000  | -0.02813700 |
| C | 2.31556000  | -0.34038300 | 1.15802000  |
| C | 1.90306300  | -0.73271400 | -1.18349800 |
| C | 3.17694900  | -1.42539600 | 1.19584300  |
| H | 2.14748800  | 0.24476600  | 2.05488700  |
| C | 2.76491000  | -1.81960900 | -1.16339800 |
| H | 1.40881100  | -0.45569200 | -2.10871700 |
| C | 3.38694300  | -2.14733000 | 0.03063000  |
| H | 3.68508100  | -1.71088300 | 2.10746900  |
| H | 2.95964000  | -2.40349200 | -2.05337900 |
| C | 1.25365500  | 2.54182500  | -0.02175800 |
| C | 0.40750300  | 3.65609600  | -0.05375100 |
| N | 2.58271700  | 2.65169100  | 0.04748900  |
| C | 0.97285800  | 4.91716800  | -0.01427800 |
| H | -0.66443900 | 3.51517700  | -0.10942800 |
| C | 3.11133100  | 3.87346700  | 0.08711100  |
| C | 2.35744900  | 5.03712100  | 0.05867300  |
| H | 0.34227100  | 5.80007000  | -0.03882300 |
| H | 4.19571100  | 3.91818800  | 0.14471700  |
| H | 2.84096300  | 6.00658200  | 0.09290900  |
| N | 4.30210100  | -3.30401800 | 0.06255800  |
| O | 4.44814000  | -3.93473700 | -0.96548100 |

|    |             |             |             |
|----|-------------|-------------|-------------|
| O  | 4.85328300  | -3.55718400 | 1.11505300  |
| H  | -2.27870200 | -2.54248400 | 0.00635200  |
| O  | -6.56970400 | -1.10212200 | -0.27014400 |
| C  | -7.21840200 | -1.01969000 | 0.98457400  |
| H  | -8.27665400 | -1.20767800 | 0.80546300  |
| H  | -6.82735600 | -1.77091100 | 1.68129700  |
| H  | -7.09570900 | -0.02549400 | 1.43047800  |
| ZZ |             |             |             |
| C  | 0.69573000  | 0.81721000  | -0.00393000 |
| N  | -0.42203000 | 0.15851200  | -0.01751600 |
| N  | -1.59764200 | 0.74329200  | -0.05731400 |
| H  | -1.63311800 | 1.75030900  | -0.19586300 |
| C  | -2.77037500 | -0.02361600 | -0.04586000 |
| C  | -3.99449600 | 0.62252000  | -0.16189400 |
| C  | -2.74475300 | -1.41447400 | 0.08655900  |
| C  | -5.18642900 | -0.09725900 | -0.14720000 |
| C  | -3.92657000 | -2.12949300 | 0.10114400  |
| H  | -1.79354400 | -1.92422400 | 0.17216300  |
| C  | -5.15817900 | -1.48194900 | -0.01394500 |
| H  | -6.12125900 | 0.44113900  | -0.24167600 |
| H  | -3.91621400 | -3.20901000 | 0.20332900  |
| C  | 1.90222200  | -0.05239800 | -0.00642100 |
| C  | 1.94177200  | -1.19663400 | 0.79612700  |
| C  | 2.99131200  | 0.22070800  | -0.84107700 |
| C  | 3.03647100  | -2.04454100 | 0.77516000  |
| H  | 1.09895600  | -1.41741100 | 1.44034900  |
| C  | 4.09449900  | -0.61642100 | -0.87319400 |
| H  | 2.96924200  | 1.08953700  | -1.49025100 |
| C  | 4.10202100  | -1.73888500 | -0.05894200 |

|    |             |             |             |
|----|-------------|-------------|-------------|
| H  | 3.07648700  | -2.92916000 | 1.39747800  |
| H  | 4.93509600  | -0.41646200 | -1.52480800 |
| C  | 0.84427400  | 2.28806200  | 0.05588600  |
| C  | 2.03439800  | 2.87846600  | 0.50867200  |
| N  | -0.21628700 | 3.04280200  | -0.28028000 |
| C  | 2.12445300  | 4.25618100  | 0.57955200  |
| H  | 2.86882600  | 2.26029200  | 0.81416100  |
| C  | -0.11506500 | 4.36932400  | -0.20837800 |
| C  | 1.03085800  | 5.02871300  | 0.20339400  |
| H  | 3.03708200  | 4.72427600  | 0.93314200  |
| H  | -1.00332700 | 4.92624100  | -0.49357300 |
| H  | 1.06003600  | 6.11126100  | 0.24144900  |
| N  | 5.27227100  | -2.62936000 | -0.08129900 |
| O  | 6.20160600  | -2.32400900 | -0.80395600 |
| O  | 5.24371000  | -3.61871200 | 0.62473200  |
| H  | -4.03008900 | 1.70320100  | -0.26687800 |
| O  | -6.25823500 | -2.28097200 | 0.01523700  |
| C  | -7.52106700 | -1.67336200 | -0.11118200 |
| H  | -7.62263600 | -1.15466800 | -1.07151700 |
| H  | -8.25155200 | -2.47898700 | -0.06223700 |
| H  | -7.71128500 | -0.96642100 | 0.70466300  |
| E3 |             |             |             |
| C  | -1.00292500 | 1.22185800  | 0.01014200  |
| N  | 0.26359800  | 1.06589100  | 0.11345000  |
| N  | 0.76044900  | -0.18086500 | 0.30502700  |
| H  | 0.17483200  | -0.97176600 | 0.06138000  |
| C  | 2.13007600  | -0.36542600 | 0.15167100  |
| C  | 2.60151400  | -1.52500900 | -0.46134200 |
| C  | 3.08265800  | 0.53378300  | 0.63291800  |

|   |             |             |             |
|---|-------------|-------------|-------------|
| C | 3.95144800  | -1.79068200 | -0.60273700 |
| C | 4.43838600  | 0.28930000  | 0.47453300  |
| C | 4.88007300  | -0.87242500 | -0.13932000 |
| C | -1.97941100 | 0.09593200  | 0.07501500  |
| C | -2.65947700 | -0.32209800 | -1.06843000 |
| C | -2.19353000 | -0.56281500 | 1.28599200  |
| C | -3.54420000 | -1.38722300 | -1.00919300 |
| H | -2.50474300 | 0.19742800  | -2.00672600 |
| C | -3.08206600 | -1.62518000 | 1.36233400  |
| H | -1.66599400 | -0.23759800 | 2.17620600  |
| C | -3.74065100 | -2.01945800 | 0.20897200  |
| H | -4.08129000 | -1.72459500 | -1.88580800 |
| H | -3.26672300 | -2.14200900 | 2.29487400  |
| C | -1.50543700 | 2.60756300  | -0.17823300 |
| C | -0.63789600 | 3.70266800  | -0.13408200 |
| N | -2.81837500 | 2.73188900  | -0.37877600 |
| C | -1.16808000 | 4.96870100  | -0.30760200 |
| H | 0.41943000  | 3.54608700  | 0.03825500  |
| C | -3.31296700 | 3.95679600  | -0.54598800 |
| C | -2.53595400 | 5.10589800  | -0.51937400 |
| H | -0.52280600 | 5.84043200  | -0.27607800 |
| H | -4.38582000 | 4.01736600  | -0.70696500 |
| H | -2.99200100 | 6.07937700  | -0.65800400 |
| N | -4.68529900 | -3.15147300 | 0.28025600  |
| O | -4.83312000 | -3.69272400 | 1.35746700  |
| O | -5.25630300 | -3.47259500 | -0.74227100 |
| F | 1.71119800  | -2.40859200 | -0.92907100 |
| F | 4.35477800  | -2.90707600 | -1.19494800 |
| F | 6.17918300  | -1.10598400 | -0.27582000 |



|    |             |             |             |
|----|-------------|-------------|-------------|
| F  | 5.32236000  | 1.16423200  | 0.93761100  |
| F  | 2.71787200  | 1.63371400  | 1.28333500  |
| Z3 |             |             |             |
| C  | -0.99193800 | 0.84337200  | -0.09004000 |
| N  | 0.09384000  | 0.14982100  | -0.07695400 |
| N  | 1.29407800  | 0.73548300  | -0.17538500 |
| H  | 1.35276900  | 1.72816000  | 0.04273400  |
| C  | 2.43182600  | -0.05022600 | -0.07837700 |
| C  | 3.57573300  | 0.49496700  | 0.50550100  |
| C  | 2.53248200  | -1.35079600 | -0.57722900 |
| C  | 4.76208100  | -0.20721500 | 0.60695100  |
| C  | 3.71163700  | -2.07200000 | -0.45947900 |
| C  | 4.83104200  | -1.50662300 | 0.12954700  |
| C  | -2.23233400 | 0.03032700  | 0.02983300  |
| C  | -2.31978300 | -1.20162400 | -0.62397400 |
| C  | -3.30168100 | 0.45399000  | 0.82425200  |
| C  | -3.45200100 | -1.98967000 | -0.50174600 |
| H  | -1.48548100 | -1.53899500 | -1.22703300 |
| C  | -4.43983400 | -0.32494600 | 0.95849000  |
| H  | -3.24100500 | 1.39623000  | 1.35801700  |
| C  | -4.49914300 | -1.53577600 | 0.28641700  |
| H  | -3.53236000 | -2.94209200 | -1.00902800 |
| H  | -5.26854300 | -0.00945600 | 1.57860000  |
| C  | -1.08970300 | 2.31924000  | -0.24731000 |
| C  | -2.22962700 | 2.91321900  | -0.79924900 |
| N  | -0.02652600 | 3.05256900  | 0.11678800  |
| C  | -2.26680800 | 4.28971100  | -0.94878100 |
| H  | -3.06656200 | 2.30383900  | -1.11611700 |
| C  | -0.07513700 | 4.37477400  | -0.02573000 |

|    |             |             |             |
|----|-------------|-------------|-------------|
| C  | -1.17297700 | 5.04431600  | -0.54513700 |
| H  | -3.13977500 | 4.76707800  | -1.38080200 |
| H  | 0.81227100  | 4.91711600  | 0.28700100  |
| H  | -1.16179000 | 6.12348400  | -0.64215300 |
| N  | -5.71069900 | -2.36401500 | 0.41391300  |
| O  | -6.61496800 | -1.93767500 | 1.10554200  |
| O  | -5.73498700 | -3.42308100 | -0.18091900 |
| F  | 1.51554600  | -1.92456100 | -1.21346900 |
| F  | 3.77614900  | -3.30787800 | -0.94005000 |
| F  | 5.95942800  | -2.19887500 | 0.22880900  |
| F  | 5.82376700  | 0.35184600  | 1.17461200  |
| F  | 3.51758200  | 1.74318400  | 0.98339000  |
| E4 |             |             |             |
| C  | 1.38503300  | 1.17341800  | -0.01618300 |
| N  | 0.10268100  | 1.10925500  | -0.01514900 |
| N  | -0.50704100 | -0.07858300 | 0.02091400  |
| H  | 0.04063800  | -0.92680200 | 0.09706200  |
| C  | -1.89129800 | -0.17467400 | 0.01493600  |
| C  | -2.47516600 | -1.43981900 | 0.12737100  |
| C  | -2.70723300 | 0.95284100  | -0.11036300 |
| C  | -3.85212800 | -1.57554600 | 0.11583700  |
| C  | -4.08313200 | 0.80560200  | -0.11995300 |
| H  | -2.25525400 | 1.93096400  | -0.20574900 |
| C  | -4.66539100 | -0.45408400 | -0.01007600 |
| H  | -4.29290300 | -2.56167600 | 0.20212100  |
| H  | -4.70950500 | 1.68478600  | -0.22183800 |
| C  | 2.26297300  | -0.03306300 | -0.01176800 |
| C  | 2.98509600  | -0.38026400 | 1.12976800  |
| C  | 2.33783300  | -0.84209200 | -1.14628800 |

|    |             |             |             |
|----|-------------|-------------|-------------|
| C  | 3.77256300  | -1.52056700 | 1.14513200  |
| H  | 2.93885700  | 0.25385700  | 2.00785900  |
| C  | 3.12447100  | -1.98481800 | -1.14776600 |
| H  | 1.78553500  | -0.56866500 | -2.03926700 |
| C  | 3.82674400  | -2.30491800 | 0.00279800  |
| H  | 4.34113800  | -1.80297700 | 2.02148400  |
| H  | 3.20001600  | -2.61872000 | -2.02155200 |
| C  | 2.01231700  | 2.51640300  | -0.02529400 |
| C  | 1.24761200  | 3.68074000  | 0.09718900  |
| N  | 3.34048100  | 2.53774100  | -0.15897300 |
| C  | 1.89507900  | 4.90252200  | 0.06789400  |
| H  | 0.17380700  | 3.60993800  | 0.21474300  |
| C  | 3.94934300  | 3.72165200  | -0.18390100 |
| C  | 3.27846200  | 4.93116800  | -0.07730800 |
| H  | 1.33054200  | 5.82445600  | 0.16071100  |
| H  | 5.02982700  | 3.69519400  | -0.29664900 |
| H  | 3.82460500  | 5.86703000  | -0.10441700 |
| N  | 4.66214600  | -3.52146400 | 0.01202400  |
| O  | 4.67247200  | -4.20394400 | -0.99278200 |
| O  | 5.28644200  | -3.76716500 | 1.02431800  |
| H  | -1.84896500 | -2.32202500 | 0.22303400  |
| C  | -6.15681200 | -0.58660900 | 0.03134900  |
| F  | -6.76711500 | 0.29846600  | -0.77774200 |
| F  | -6.57102200 | -1.81133000 | -0.33638500 |
| F  | -6.65027400 | -0.37074600 | 1.26948400  |
| Z4 |             |             |             |
| C  | 1.33500600  | 0.87866900  | 0.01506600  |
| N  | 0.14941800  | 0.36433200  | 0.00374600  |
| N  | -0.94594200 | 1.10737600  | -0.02890100 |

|   |             |             |             |
|---|-------------|-------------|-------------|
| H | -0.84535800 | 2.10878400  | -0.17523100 |
| C | -2.19866300 | 0.50625900  | -0.03749800 |
| C | -3.32679100 | 1.32595500  | -0.11635400 |
| C | -2.35596000 | -0.88104800 | 0.03579700  |
| C | -4.59521200 | 0.76950900  | -0.12145800 |
| C | -3.62631400 | -1.42660600 | 0.02929500  |
| H | -1.48042900 | -1.51463600 | 0.08895400  |
| C | -4.75256100 | -0.60904000 | -0.04882800 |
| H | -5.46266300 | 1.41552400  | -0.18349200 |
| H | -3.74283700 | -2.50373000 | 0.08442200  |
| C | 2.43053300  | -0.12951700 | 0.00988300  |
| C | 2.37542100  | -1.23282200 | 0.86436600  |
| C | 3.50291600  | -0.01548700 | -0.87960900 |
| C | 3.36694900  | -2.20056100 | 0.83993300  |
| H | 1.54453900  | -1.32669200 | 1.55373700  |
| C | 4.49996100  | -0.97617000 | -0.91972300 |
| H | 3.54984400  | 0.82493200  | -1.56396500 |
| C | 4.41766900  | -2.05553400 | -0.05313500 |
| H | 3.33676200  | -3.05448400 | 1.50399800  |
| H | 5.32550500  | -0.90348300 | -1.61546500 |
| C | 1.67372800  | 2.32239800  | 0.06225900  |
| C | 2.93052600  | 2.75154300  | 0.50978600  |
| N | 0.72326000  | 3.20472200  | -0.28867100 |
| C | 3.20250100  | 4.10716300  | 0.56538700  |
| H | 3.67562900  | 2.03072500  | 0.82103200  |
| C | 0.99954200  | 4.50615000  | -0.23594200 |
| C | 2.22290400  | 5.01171400  | 0.17444700  |
| H | 4.16835400  | 4.45512400  | 0.91603400  |
| H | 0.19614500  | 5.17334600  | -0.53483400 |

|    |             |             |             |
|----|-------------|-------------|-------------|
| H  | 2.39530500  | 6.08117300  | 0.19857700  |
| N  | 5.47813300  | -3.07724000 | -0.08332500 |
| O  | 6.38737300  | -2.92277600 | -0.87514800 |
| O  | 5.38188800  | -4.01308000 | 0.68568600  |
| H  | -3.20948800 | 2.40371000  | -0.17458100 |
| C  | -6.11214400 | -1.23731400 | -0.03129000 |
| F  | -7.09488700 | -0.34638000 | -0.24089400 |
| F  | -6.37526200 | -1.83781800 | 1.14827600  |
| F  | -6.23868700 | -2.19239600 | -0.97379500 |
| E5 |             |             |             |
| C  | -0.57547100 | 1.16105100  | -0.00882500 |
| N  | 0.69912600  | 1.01072100  | -0.01936700 |
| N  | 1.22031400  | -0.22072300 | -0.05827400 |
| H  | 0.60911600  | -1.02585400 | -0.11764600 |
| C  | 2.59048700  | -0.41975700 | -0.04911000 |
| C  | 3.07743100  | -1.72831900 | -0.15317600 |
| C  | 3.48908400  | 0.64522100  | 0.06740300  |
| C  | 4.43737800  | -1.96847700 | -0.14074100 |
| C  | 4.84911700  | 0.39793600  | 0.07783100  |
| H  | 3.11019500  | 1.65488500  | 0.15274700  |
| C  | 5.33926200  | -0.90688300 | -0.02561200 |
| H  | 4.80845200  | -2.98365800 | -0.22312000 |
| H  | 5.54510400  | 1.22422200  | 0.16902000  |
| C  | -1.53084500 | 0.01438000  | -0.00459600 |
| C  | -2.22014900 | -0.34009000 | -1.16374200 |
| C  | -1.71012500 | -0.73271100 | 1.15993200  |
| C  | -3.08027900 | -1.42723700 | -1.16596200 |
| H  | -2.08983100 | 0.24474600  | -2.06729700 |
| C  | -2.57053500 | -1.82068400 | 1.17461200  |

|    |             |             |             |
|----|-------------|-------------|-------------|
| H  | -1.18067100 | -0.45354300 | 2.06477200  |
| C  | -3.23975700 | -2.14939600 | 0.00679500  |
| H  | -3.62493100 | -1.71448100 | -2.05577300 |
| H  | -2.72834000 | -2.40476300 | 2.07176300  |
| C  | -1.11596000 | 2.54093600  | 0.01178900  |
| C  | -0.27811500 | 3.65675300  | -0.07473900 |
| N  | -2.44240900 | 2.64171800  | 0.12353000  |
| C  | -0.84954500 | 4.91584300  | -0.03203300 |
| H  | 0.79136700  | 3.52155600  | -0.17414000 |
| C  | -2.97742600 | 3.86029000  | 0.16120500  |
| C  | -2.23061200 | 5.02756700  | 0.09038500  |
| H  | -0.22671900 | 5.80209600  | -0.09485200 |
| H  | -4.05921500 | 3.90013700  | 0.25527100  |
| H  | -2.71856700 | 5.99460300  | 0.12836900  |
| N  | -4.15267400 | -3.30948800 | 0.01175100  |
| O  | -4.25409600 | -3.93975000 | 1.04495100  |
| O  | -4.74441300 | -3.56341600 | -1.01779400 |
| H  | 2.38483400  | -2.55969900 | -0.24539900 |
| C  | 6.74824200  | -1.15377400 | -0.01184900 |
| N  | 7.88338300  | -1.35234500 | -0.00026500 |
| Z5 |             |             |             |
| C  | -0.51887800 | 0.80082600  | -0.00545300 |
| N  | 0.59127300  | 0.14079200  | 0.00697900  |
| N  | 1.77397800  | 0.73902900  | 0.03778700  |
| H  | 1.80127700  | 1.74693300  | 0.17447900  |
| C  | 2.93508800  | -0.01944000 | 0.04322000  |
| C  | 2.90788000  | -1.41434600 | -0.05190400 |
| C  | 5.34412800  | -0.07150900 | 0.14512200  |
| C  | 4.09292500  | -2.12575800 | -0.04797800 |

|   |             |             |             |
|---|-------------|-------------|-------------|
| H | 1.95635700  | -1.92427500 | -0.12260100 |
| C | 5.32137400  | -1.46583000 | 0.04944500  |
| H | 6.29276400  | 0.44714900  | 0.22354700  |
| H | 4.07065000  | -3.20725600 | -0.12151800 |
| C | -1.73228800 | -0.06350500 | -0.00074300 |
| C | -1.81967900 | -1.15133100 | -0.87183700 |
| C | -2.77439200 | 0.16856500  | 0.90148200  |
| C | -2.92283800 | -1.98999300 | -0.85163800 |
| H | -1.01248000 | -1.33666900 | -1.57073400 |
| C | -3.88259400 | -0.66223200 | 0.93652600  |
| H | -2.71210200 | 0.99795300  | 1.59801600  |
| C | -3.94038500 | -1.72967100 | 0.05346700  |
| H | -3.00413000 | -2.83156500 | -1.52722400 |
| H | -4.68815900 | -0.49909900 | 1.64044900  |
| C | -0.67483500 | 2.27541300  | -0.05948700 |
| C | -1.87764200 | 2.85518000  | -0.48392000 |
| N | 0.38696400  | 3.03357900  | 0.26128900  |
| C | -1.97843700 | 4.23400300  | -0.54864300 |
| H | -2.71469100 | 2.23160200  | -0.77068700 |
| C | 0.27598300  | 4.35891600  | 0.19821100  |
| C | -0.88339700 | 5.01085800  | -0.19119000 |
| H | -2.90120800 | 4.69754400  | -0.88065700 |
| H | 1.16447400  | 4.92136300  | 0.47051700  |
| H | -0.92055600 | 6.09324100  | -0.22465000 |
| N | -5.11934900 | -2.61279300 | 0.07752900  |
| O | -6.00542200 | -2.34853900 | 0.86629600  |
| O | -5.13588700 | -3.55175100 | -0.69330100 |
| C | 4.16286500  | 0.64486200  | 0.14149400  |
| H | 4.18808700  | 1.72758400  | 0.21671800  |

|    |             |             |             |
|----|-------------|-------------|-------------|
| C  | 6.54388600  | -2.20898500 | 0.05192400  |
| N  | 7.52965000  | -2.80608100 | 0.05381500  |
| E6 |             |             |             |
| C  | 0.99327100  | 1.17275600  | -0.00234200 |
| N  | -0.28649100 | 1.07881800  | 0.00820400  |
| N  | -0.86401300 | -0.12854700 | 0.04948100  |
| H  | -0.29126100 | -0.96108000 | 0.11479100  |
| C  | -2.23962500 | -0.26186000 | 0.04398500  |
| C  | -2.78795500 | -1.54786000 | 0.14506600  |
| C  | -3.08600500 | 0.84774100  | -0.06572300 |
| C  | -4.15706300 | -1.72480500 | 0.13639900  |
| C  | -4.45617400 | 0.66823300  | -0.07229800 |
| H  | -2.65871600 | 1.83767000  | -0.14896400 |
| C  | -4.98273900 | -0.61285700 | 0.02897100  |
| H  | -4.59188500 | -2.71255100 | 0.21517200  |
| H  | -5.12571800 | 1.51447700  | -0.15697300 |
| C  | 1.89947700  | -0.01281300 | -0.00475900 |
| C  | 2.62148400  | -0.35577500 | 1.13794700  |
| C  | 2.00020400  | -0.80600400 | -1.14824700 |
| C  | 3.43489200  | -1.47795400 | 1.14531200  |
| H  | 2.55470500  | 0.26644100  | 2.02320800  |
| C  | 2.81339000  | -1.92997800 | -1.15746300 |
| H  | 1.44785200  | -0.53490300 | -2.04190400 |
| C  | 3.51491600  | -2.24702300 | -0.00572500 |
| H  | 4.00396400  | -1.75750900 | 2.02225200  |
| H  | 2.90992200  | -2.55132700 | -2.03815300 |
| C  | 1.59012500  | 2.53014400  | -0.01923600 |
| C  | 0.79974300  | 3.67758700  | 0.09390700  |
| N  | 2.91742100  | 2.57854600  | -0.15245500 |



|    |             |             |             |
|----|-------------|-------------|-------------|
| C  | 1.42074300  | 4.91312000  | 0.05607800  |
| H  | -0.27245000 | 3.58497100  | 0.21064100  |
| C  | 3.50063200  | 3.77491700  | -0.18583000 |
| C  | 2.80293500  | 4.97031200  | -0.08850500 |
| H  | 0.83611200  | 5.82316000  | 0.14081400  |
| H  | 4.58140700  | 3.77164600  | -0.29796100 |
| H  | 3.32862300  | 5.91752200  | -0.12286900 |
| N  | 4.37835400  | -3.44450700 | -0.00470700 |
| O  | 4.41226700  | -4.11313200 | -1.01800600 |
| O  | 4.99950300  | -3.68826700 | 1.00975400  |
| H  | -2.13573000 | -2.41162400 | 0.23120700  |
| N  | -6.43418900 | -0.79561900 | 0.01928400  |
| O  | -7.13048400 | 0.19868800  | -0.06965600 |
| O  | -6.86352300 | -1.93166500 | 0.10101800  |
| Z6 |             |             |             |
| C  | -0.93047100 | 0.84090700  | -0.01709000 |
| N  | 0.21890900  | 0.25291700  | -0.00564100 |
| N  | 1.35894300  | 0.93333200  | 0.02407200  |
| H  | 1.31417800  | 1.93993400  | 0.16669000  |
| C  | 2.56973600  | 0.26353900  | 0.03194100  |
| C  | 3.74424000  | 1.02367000  | 0.11407300  |
| C  | 2.64827300  | -1.13181900 | -0.04495400 |
| C  | 4.97758400  | 0.40355300  | 0.11926100  |
| C  | 3.88378100  | -1.75129100 | -0.03958800 |
| H  | 1.73858000  | -1.71437800 | -0.10128900 |
| C  | 5.03779500  | -0.98210600 | 0.04064800  |
| H  | 5.89228600  | 0.97830300  | 0.18303800  |
| H  | 3.96307300  | -2.82911700 | -0.09769500 |
| C  | -2.08892600 | -0.09543000 | -0.00912600 |

|    |             |             |             |
|----|-------------|-------------|-------------|
| C  | -2.11393500 | -1.18940500 | -0.87622500 |
| C  | -3.14025600 | 0.07853700  | 0.89535400  |
| C  | -3.16600200 | -2.09135300 | -0.84992300 |
| H  | -1.29902000 | -1.32901200 | -1.57684000 |
| C  | -4.19698600 | -0.81618800 | 0.93702600  |
| H  | -3.12517400 | 0.91282800  | 1.58860100  |
| C  | -4.19411200 | -1.88818500 | 0.05761200  |
| H  | -3.19981100 | -2.93865500 | -1.52243600 |
| H  | -5.00870800 | -0.69880800 | 1.64295700  |
| C  | -1.18037600 | 2.30381400  | -0.06611700 |
| C  | -2.41215100 | 2.80676500  | -0.50425200 |
| N  | -0.17518400 | 3.12683700  | 0.27559300  |
| C  | -2.60179700 | 4.17676400  | -0.56023600 |
| H  | -3.20219500 | 2.13172000  | -0.80730200 |
| C  | -0.37176100 | 4.44245300  | 0.22243200  |
| C  | -1.56591500 | 5.02023200  | -0.17917700 |
| H  | -3.54757100 | 4.58233500  | -0.90325800 |
| H  | 0.47338900  | 5.05967300  | 0.51330800  |
| H  | -1.67405300 | 6.09804300  | -0.20388400 |
| N  | -5.31919000 | -2.83921400 | 0.08847400  |
| O  | -6.21436700 | -2.62720200 | 0.88261200  |
| O  | -5.28490700 | -3.77726500 | -0.68268200 |
| H  | 3.68412600  | 2.10570800  | 0.17442400  |
| N  | 6.34333300  | -1.64237600 | 0.04426900  |
| O  | 6.36596700  | -2.85726900 | -0.02482500 |
| O  | 7.33467000  | -0.93898700 | 0.11569100  |
| E7 |             |             |             |
| C  | -0.25846900 | 1.01286100  | -0.02457600 |
| N  | -1.44777600 | 0.52833300  | -0.02277400 |

|   |             |             |             |
|---|-------------|-------------|-------------|
| N | -1.63667100 | -0.79034500 | 0.01537400  |
| H | -0.86621900 | -1.44228300 | 0.11253000  |
| C | -2.91133000 | -1.33588700 | 0.03835400  |
| N | -2.92893300 | -2.65974500 | 0.16012500  |
| C | -4.06402000 | -0.54989400 | -0.06743900 |
| C | -4.11712200 | -3.26201400 | 0.18429000  |
| C | -5.28275000 | -1.20048800 | -0.03795300 |
| H | -3.98533600 | 0.52364300  | -0.17181600 |
| C | -5.32395500 | -2.58724300 | 0.09111800  |
| H | -4.09174200 | -4.34352500 | 0.28606700  |
| H | -6.20166700 | -0.62860400 | -0.11727900 |
| H | -6.26265500 | -3.12727400 | 0.11752300  |
| C | 0.97289100  | 0.17114600  | -0.01704800 |
| C | 1.79412800  | 0.12988300  | 1.10950400  |
| C | 1.29683200  | -0.60071900 | -1.13307600 |
| C | 2.92531200  | -0.66969100 | 1.12705200  |
| H | 1.55076800  | 0.73717500  | 1.97385400  |
| C | 2.42874800  | -1.40260600 | -1.13313800 |
| H | 0.66281400  | -0.56687900 | -2.01280900 |
| C | 3.22362700  | -1.42278000 | 0.00132100  |
| H | 3.57486500  | -0.71192700 | 1.99149200  |
| H | 2.69789000  | -2.00110600 | -1.99353100 |
| C | -0.11727100 | 2.48916700  | -0.03624300 |
| C | -1.22841900 | 3.32907400  | 0.09342800  |
| N | 1.12452100  | 2.95812100  | -0.17885600 |
| C | -1.03096200 | 4.69739200  | 0.06153600  |
| H | -2.21453500 | 2.90003200  | 0.21734300  |
| C | 1.29851900  | 4.27796800  | -0.20588200 |
| C | 0.26065400  | 5.19126000  | -0.09276000 |

|    |             |             |             |
|----|-------------|-------------|-------------|
| H  | -1.87300300 | 5.37494300  | 0.15888100  |
| H  | 2.32396800  | 4.61734500  | -0.32572600 |
| H  | 0.45949200  | 6.25639500  | -0.12262500 |
| N  | 4.42961900  | -2.27214600 | 0.01116000  |
| O  | 4.66848200  | -2.92290100 | -0.98648500 |
| O  | 5.11171300  | -2.26985400 | 1.01647900  |
| Z7 |             |             |             |
| C  | 0.15076000  | 0.58626500  | -0.01621200 |
| N  | 1.06710500  | -0.32474600 | -0.00051900 |
| N  | 2.35720100  | -0.03902900 | 0.03358800  |
| H  | 2.66663100  | 0.91808800  | 0.18457500  |
| C  | 3.30073900  | -1.05835000 | 0.04979100  |
| N  | 4.55539300  | -0.63123900 | 0.15835100  |
| C  | 2.94528100  | -2.40832900 | -0.04528500 |
| C  | 5.52004000  | -1.55001200 | 0.17681800  |
| C  | 3.96558500  | -3.33981600 | -0.02372300 |
| H  | 1.90473400  | -2.69262200 | -0.12584200 |
| C  | 5.28731900  | -2.91342600 | 0.08874600  |
| H  | 6.53196100  | -1.16447300 | 0.26872300  |
| H  | 3.73300900  | -4.39746300 | -0.09488900 |
| H  | 6.11072200  | -3.61727700 | 0.10857200  |
| C  | -1.23659800 | 0.04730800  | -0.01165800 |
| C  | -2.20913900 | 0.57578700  | 0.84292100  |
| C  | -1.57317900 | -1.03419000 | -0.82966800 |
| C  | -3.48700000 | 0.04260800  | 0.88450600  |
| H  | -1.95904900 | 1.40273000  | 1.49891700  |
| C  | -2.84740400 | -1.57688300 | -0.80266000 |
| H  | -0.82236400 | -1.44808800 | -1.49234500 |
| C  | -3.78821000 | -1.02754900 | 0.05575100  |

|    |             |             |             |
|----|-------------|-------------|-------------|
| H  | -4.24084500 | 0.43652500  | 1.55349100  |
| H  | -3.11951300 | -2.40981000 | -1.43790500 |
| C  | 0.36433400  | 2.05371900  | -0.06791900 |
| C  | -0.63458000 | 2.90954800  | -0.55109000 |
| N  | 1.56035100  | 2.52640400  | 0.31504300  |
| C  | -0.38834000 | 4.27018100  | -0.60864700 |
| H  | -1.58281900 | 2.50858400  | -0.88649700 |
| C  | 1.78423800  | 3.83705100  | 0.25789200  |
| C  | 0.84386100  | 4.75392900  | -0.18620300 |
| H  | -1.14894300 | 4.94676900  | -0.98374000 |
| H  | 2.76902400  | 4.16211000  | 0.58121600  |
| H  | 1.07634400  | 5.81203900  | -0.21134700 |
| N  | -5.14561100 | -1.59568500 | 0.08776600  |
| O  | -5.38197800 | -2.53519700 | -0.64629400 |
| O  | -5.95129800 | -1.09156500 | 0.84595900  |
| E8 |             |             |             |
| C  | -1.15717100 | 1.24867600  | 0.02311700  |
| N  | 0.07438400  | 1.61811200  | 0.02504800  |
| N  | 1.04057800  | 0.70100700  | 0.00542900  |
| H  | 0.84367300  | -0.29181100 | -0.07020000 |
| C  | -1.57947700 | -0.18179400 | 0.03363900  |
| C  | -2.18490000 | -0.75143400 | -1.08609600 |
| C  | -1.32946200 | -0.97213800 | 1.15581400  |
| C  | -2.53364000 | -2.09219600 | -1.09327700 |
| H  | -2.39120100 | -0.13754000 | -1.95537400 |
| C  | -1.67600500 | -2.31479700 | 1.16643600  |
| H  | -0.86140000 | -0.53176300 | 2.02968500  |
| C  | -2.27040000 | -2.85251700 | 0.03641300  |
| H  | -3.00289200 | -2.54961700 | -1.95431200 |

|   |             |             |             |
|---|-------------|-------------|-------------|
| H | -1.49042000 | -2.93858400 | 2.03068400  |
| C | -2.19364200 | 2.30692100  | 0.01038200  |
| C | -1.85679300 | 3.65608300  | -0.14583000 |
| N | -3.45539600 | 1.89467800  | 0.15721500  |
| C | -2.86978500 | 4.59704400  | -0.13602100 |
| H | -0.81946300 | 3.93834100  | -0.27320700 |
| C | -4.41973600 | 2.81302800  | 0.16286600  |
| C | -4.18561200 | 4.17292200  | 0.02310700  |
| H | -2.64005000 | 5.65073700  | -0.25654100 |
| H | -5.43101100 | 2.43460400  | 0.28685900  |
| H | -5.00929500 | 4.87748500  | 0.03494000  |
| N | -2.63501200 | -4.28117700 | 0.03454400  |
| O | -2.37919200 | -4.93003900 | 1.02973100  |
| O | -3.16776800 | -4.72604100 | -0.96280400 |
| C | 2.37250500  | 1.06267800  | 0.02174700  |
| C | 3.31585200  | -0.01085200 | -0.05340000 |
| C | 2.82153000  | 2.35964100  | 0.11248400  |
| C | 4.70072500  | 0.28027100  | -0.03424200 |
| C | 4.20521700  | 2.62927400  | 0.12901700  |
| H | 2.10357200  | 3.16761000  | 0.17339400  |
| C | 3.67586400  | -2.26551200 | -0.20976000 |
| C | 5.58287800  | -0.82358100 | -0.10993000 |
| C | 5.13430000  | 1.62581400  | 0.05816300  |
| H | 4.53129300  | 3.66168000  | 0.20263700  |
| C | 5.07689200  | -2.09143900 | -0.19771800 |
| H | 3.25085300  | -3.26371500 | -0.28045100 |
| H | 6.65501500  | -0.65017600 | -0.09722300 |
| H | 6.19713000  | 1.84426100  | 0.07411600  |
| H | 5.72782100  | -2.95633300 | -0.25675300 |

|    |             |             |             |
|----|-------------|-------------|-------------|
| N  | 2.82361900  | -1.27306300 | -0.14011200 |
| Z8 |             |             |             |
| C  | 0.73898900  | 0.57118100  | 0.03631900  |
| N  | -0.17286000 | -0.34664200 | 0.02548300  |
| N  | -1.46389700 | -0.06763600 | 0.00529500  |
| H  | -1.78317800 | 0.89025900  | -0.12778200 |
| C  | 2.12817700  | 0.03983500  | 0.01082400  |
| C  | 2.47415500  | -1.05971600 | 0.80130000  |
| C  | 3.09477200  | 0.59143800  | -0.83634100 |
| C  | 3.74954500  | -1.59742400 | 0.75396800  |
| H  | 1.72803800  | -1.49198200 | 1.45742300  |
| C  | 4.37418200  | 0.06399600  | -0.89741900 |
| H  | 2.83825500  | 1.43173600  | -1.47253200 |
| C  | 4.68419100  | -1.02452800 | -0.09612600 |
| H  | 4.02745000  | -2.44485600 | 1.36713000  |
| H  | 5.12293000  | 0.47601300  | -1.56126600 |
| C  | 0.51439000  | 2.03500100  | 0.10548100  |
| C  | 1.50835800  | 2.89776000  | 0.58809500  |
| N  | -0.69166400 | 2.49702600  | -0.25606700 |
| C  | 1.24368600  | 4.25354500  | 0.66838800  |
| H  | 2.46600300  | 2.50524700  | 0.90654000  |
| C  | -0.93455300 | 3.80248700  | -0.17495000 |
| C  | -0.00153400 | 4.72610200  | 0.27054000  |
| H  | 1.99969500  | 4.93548100  | 1.04328300  |
| H  | -1.92950800 | 4.11528600  | -0.47882200 |
| H  | -0.24829700 | 5.78035400  | 0.31632500  |
| N  | 6.04248100  | -1.58704100 | -0.15043100 |
| O  | 6.84348700  | -1.05951600 | -0.89798000 |
| O  | 6.28595100  | -2.54620500 | 0.55574900  |

|    |             |             |             |
|----|-------------|-------------|-------------|
| C  | -2.39260200 | -1.09398500 | 0.02721800  |
| C  | -3.76869400 | -0.71304200 | -0.06054300 |
| C  | -2.05885900 | -2.42498200 | 0.13008600  |
| C  | -4.76634800 | -1.71862600 | -0.03687400 |
| C  | -3.06565400 | -3.41031700 | 0.15113100  |
| H  | -1.01466100 | -2.70472700 | 0.18965700  |
| C  | -5.31335500 | 0.96376300  | -0.25245100 |
| C  | -6.11069000 | -1.28710200 | -0.13046300 |
| C  | -4.39236000 | -3.08009600 | 0.07168800  |
| H  | -2.77252500 | -4.45192100 | 0.23287900  |
| C  | -6.38789500 | 0.04742500  | -0.23875000 |
| H  | -5.51074400 | 2.02975000  | -0.33947700 |
| H  | -6.90768400 | -2.02483700 | -0.11697700 |
| H  | -5.16155400 | -3.84538200 | 0.08839400  |
| H  | -7.40687100 | 0.40987600  | -0.31476700 |
| N  | -4.05552300 | 0.60988800  | -0.16697900 |
| E9 |             |             |             |
| C  | -1.01807800 | 1.14939900  | -0.00629100 |
| N  | 0.24205000  | 0.90608300  | -0.02136600 |
| N  | 0.67343400  | -0.35752800 | -0.05556100 |
| H  | 0.00631700  | -1.11742300 | -0.10197900 |
| C  | 2.03138100  | -0.64759500 | -0.05610000 |
| C  | 2.37455500  | -2.04386500 | -0.15314100 |
| C  | 2.99338200  | 0.31954600  | 0.03253700  |
| C  | 3.66249900  | -2.46786100 | -0.16251100 |
| C  | 4.35098700  | -0.09586900 | 0.02374400  |
| H  | 2.74023700  | 1.36742700  | 0.11088100  |
| C  | 4.69592800  | -1.49049900 | -0.07304000 |
| H  | 3.91573800  | -3.51845500 | -0.23769100 |



|    |             |             |             |
|----|-------------|-------------|-------------|
| C  | -2.05409000 | 0.07512600  | 0.00177100  |
| C  | -2.74025400 | -0.25452800 | -1.16655400 |
| C  | -2.31286500 | -0.63270700 | 1.17562100  |
| C  | -3.67698200 | -1.27629800 | -1.16843200 |
| H  | -2.54660600 | 0.29955700  | -2.07817100 |
| C  | -3.25037100 | -1.65502100 | 1.19091500  |
| H  | -1.78465300 | -0.37334700 | 2.08698900  |
| C  | -3.91552300 | -1.95971900 | 0.01407800  |
| H  | -4.22005300 | -1.54193900 | -2.06579500 |
| H  | -3.46975400 | -2.20714100 | 2.09531200  |
| C  | -1.45669900 | 2.56445100  | 0.00866700  |
| C  | -0.53960600 | 3.61592600  | -0.08171500 |
| N  | -2.77279900 | 2.76142800  | 0.11727200  |
| C  | -1.01878200 | 4.91328800  | -0.04776200 |
| H  | 0.51786000  | 3.40420700  | -0.17675100 |
| C  | -3.21798600 | 4.01582900  | 0.14699300  |
| C  | -2.38847300 | 5.12540700  | 0.07086900  |
| H  | -0.33219100 | 5.75085300  | -0.11370100 |
| H  | -4.29413500 | 4.13468200  | 0.23903000  |
| H  | -2.80614100 | 6.12514500  | 0.10201300  |
| N  | -4.91037700 | -3.04988800 | 0.02029400  |
| O  | -5.08386800 | -3.64640200 | 1.06407600  |
| O  | -5.49322500 | -3.28548500 | -1.01882000 |
| H  | 1.57113900  | -2.77223000 | -0.22182800 |
| N  | 6.00422200  | -1.72051400 | -0.06759600 |
| N  | 5.41696400  | 0.69826100  | 0.10096400  |
| S  | 6.72690000  | -0.26820000 | 0.05273100  |
| Z9 |             |             |             |
| C  | -1.07894800 | 0.92434300  | 0.01419700  |

|   |             |             |             |
|---|-------------|-------------|-------------|
| N | 0.11921500  | 0.44061200  | 0.05055100  |
| N | 1.19356600  | 1.21254800  | 0.08933000  |
| H | 1.06422900  | 2.20980700  | 0.23943500  |
| C | 2.46221100  | 0.64404400  | 0.08857700  |
| C | 3.55769200  | 1.57506400  | 0.18303400  |
| C | 2.67500900  | -0.70283800 | -0.00506000 |
| C | 4.85054700  | 1.16652100  | 0.18331500  |
| C | 4.01938500  | -1.15990600 | -0.00803000 |
| H | 1.85467300  | -1.40421600 | -0.06960900 |
| C | 5.11607400  | -0.23032700 | 0.08473400  |
| H | 5.67133300  | 1.86997600  | 0.25457900  |
| C | -2.14952300 | -0.10894100 | 0.01371600  |
| C | -2.00292500 | -1.26811600 | -0.75290600 |
| C | -3.28964300 | 0.03317600  | 0.81077900  |
| C | -2.96960400 | -2.25977100 | -0.73442500 |
| H | -1.11725400 | -1.38731900 | -1.36544400 |
| C | -4.26551400 | -0.94961000 | 0.84050300  |
| H | -3.40996900 | 0.91479500  | 1.43109200  |
| C | -4.09179100 | -2.08292200 | 0.06114300  |
| H | -2.86512800 | -3.15841800 | -1.32811100 |
| H | -5.14567500 | -0.85106900 | 1.46212300  |
| C | -1.44449800 | 2.36119600  | -0.06595600 |
| C | -2.68031800 | 2.76188700  | -0.59082200 |
| N | -0.53213100 | 3.26487700  | 0.32857200  |
| C | -2.97388500 | 4.11154900  | -0.67664600 |
| H | -3.39258300 | 2.02401600  | -0.93703600 |
| C | -0.82896300 | 4.56028500  | 0.24610600  |
| C | -2.03594900 | 5.03838600  | -0.23868200 |
| H | -3.92381400 | 4.43738100  | -1.08678900 |

|     |             |             |             |
|-----|-------------|-------------|-------------|
| H   | -0.05641500 | 5.24569800  | 0.58275200  |
| H   | -2.22626200 | 6.10410400  | -0.28426600 |
| N   | -5.12891100 | -3.12815400 | 0.08026000  |
| O   | -6.10743100 | -2.93900700 | 0.77649100  |
| O   | -4.94632200 | -4.11676200 | -0.60211700 |
| H   | 3.32867800  | 2.63436300  | 0.25626300  |
| N   | 4.41917000  | -2.42714700 | -0.09426200 |
| N   | 6.31155800  | -0.80907200 | 0.06726200  |
| S   | 6.04717400  | -2.40954600 | -0.05771400 |
| E10 |             |             |             |
| C   | -0.29712900 | 0.83448800  | -0.00172300 |
| N   | 0.98132400  | 0.70120000  | -0.00462500 |
| N   | 1.52773500  | -0.51187800 | -0.03293700 |
| H   | 0.93636200  | -1.33118600 | -0.09831500 |
| C   | 2.91196200  | -0.68408500 | -0.03339900 |
| C   | 3.42217900  | -1.97921900 | -0.15008300 |
| C   | 3.78780700  | 0.39516800  | 0.08815100  |
| C   | 4.79317700  | -2.18895300 | -0.14626900 |
| C   | 5.15728600  | 0.16885200  | 0.08790300  |
| H   | 3.38861700  | 1.39671200  | 0.18412400  |
| C   | 5.67198400  | -1.11770500 | -0.02844300 |
| H   | 5.17618200  | -3.19999000 | -0.23942800 |
| H   | 5.83140300  | 1.01423800  | 0.18231100  |
| H   | 6.74349400  | -1.28396600 | -0.02644700 |
| C   | -1.23526400 | -0.32574600 | 0.00215200  |
| C   | -1.93516100 | -0.68092400 | -1.15039300 |
| C   | -1.38966200 | -1.09035400 | 1.15871800  |
| C   | -2.77656600 | -1.78149800 | -1.15206000 |
| H   | -1.82598900 | -0.08370700 | -2.04885900 |

|   |             |             |             |
|---|-------------|-------------|-------------|
| C | -2.23214600 | -2.19150500 | 1.17005100  |
| H | -0.85184100 | -0.81359000 | 2.05965500  |
| C | -2.92679700 | -2.54045700 | 0.01091400  |
| H | -3.32136000 | -2.05499500 | -2.04838300 |
| H | -2.35791600 | -2.77795200 | 2.07292700  |
| C | -0.85087600 | 2.20781200  | 0.00677100  |
| C | -0.01972100 | 3.33110000  | -0.07050200 |
| N | -2.17976800 | 2.30270900  | 0.09738900  |
| C | -0.59909100 | 4.58601300  | -0.04179300 |
| H | 1.05191600  | 3.20124900  | -0.15229600 |
| C | -2.72235100 | 3.51881000  | 0.12143800  |
| C | -1.98330400 | 4.69068800  | 0.05797700  |
| H | 0.01959900  | 5.47583300  | -0.09803800 |
| H | -3.80598900 | 3.55180400  | 0.19817700  |
| H | -2.47784900 | 5.65485900  | 0.08410000  |
| H | 2.74351000  | -2.82271200 | -0.24598700 |
| C | -3.79570700 | -3.68160200 | 0.01344000  |
| N | -4.49127300 | -4.59944400 | 0.01436700  |

Z10

|   |             |             |             |
|---|-------------|-------------|-------------|
| C | -0.25384500 | 0.46860000  | 0.02342800  |
| N | 0.76699100  | -0.32880900 | 0.02796300  |
| N | 2.01143400  | 0.10471500  | 0.05639800  |
| H | 2.17299800  | 1.09965800  | 0.19024500  |
| C | 3.07760400  | -0.79742000 | 0.04593900  |
| C | 4.37274500  | -0.28395300 | 0.14276200  |
| C | 2.88500100  | -2.17475600 | -0.06359100 |
| C | 5.46310600  | -1.14133000 | 0.13107200  |
| C | 3.98607400  | -3.02014300 | -0.07414100 |
| H | 1.87928800  | -2.56932600 | -0.13372400 |

|     |             |             |             |
|-----|-------------|-------------|-------------|
| C   | 5.27860300  | -2.51517900 | 0.02177400  |
| H   | 6.46393200  | -0.72920200 | 0.20953100  |
| H   | 3.82816900  | -4.09051000 | -0.15949900 |
| H   | 6.13140400  | -3.18511800 | 0.01277000  |
| C   | -1.56579600 | -0.23486800 | 0.02473600  |
| C   | -1.77977000 | -1.31857200 | -0.82978500 |
| C   | -2.58675900 | 0.13867700  | 0.90334000  |
| C   | -2.98035100 | -2.00855500 | -0.81660800 |
| H   | -0.99033000 | -1.61745300 | -1.50961300 |
| C   | -3.79112600 | -0.54482500 | 0.92724300  |
| H   | -2.43090700 | 0.96445800  | 1.58987600  |
| C   | -3.99495100 | -1.62159800 | 0.06166600  |
| H   | -3.14006700 | -2.84362000 | -1.48928200 |
| H   | -4.57216300 | -0.25452300 | 1.62072500  |
| C   | -0.21543300 | 1.94845200  | -0.03063500 |
| C   | -1.33318600 | 2.68649200  | -0.44856800 |
| N   | 0.94042000  | 2.56133700  | 0.27801200  |
| C   | -1.24749800 | 4.06499000  | -0.51976900 |
| H   | -2.24899900 | 2.18175000  | -0.72766200 |
| C   | 1.00855100  | 3.88946300  | 0.20674300  |
| C   | -0.05425200 | 4.69050600  | -0.17717800 |
| H   | -2.10284800 | 4.64669800  | -0.84705800 |
| H   | 1.96750800  | 4.32841400  | 0.46744800  |
| H   | 0.05589400  | 5.76767000  | -0.21869000 |
| H   | 4.52354100  | 0.78842200  | 0.22933400  |
| C   | -5.24261400 | -2.32696100 | 0.07565400  |
| N   | -6.24656500 | -2.89173500 | 0.08635600  |
| E11 |             |             |             |
| C   | 1.08886800  | 0.83163600  | -0.03364700 |

|   |             |             |             |
|---|-------------|-------------|-------------|
| N | -0.19642300 | 0.84370300  | -0.07498900 |
| N | -0.87818500 | -0.29795300 | -0.06925700 |
| H | -0.38791000 | -1.17939100 | 0.01931600  |
| C | -2.27363900 | -0.31227100 | -0.12147400 |
| C | -2.93110300 | -1.53987100 | -0.02771200 |
| C | -3.01875900 | 0.85607800  | -0.28024800 |
| C | -4.31549900 | -1.59890000 | -0.08693200 |
| C | -4.40367800 | 0.78783300  | -0.33784400 |
| H | -2.50976800 | 1.80718700  | -0.36877700 |
| C | -5.05786700 | -0.43456700 | -0.24103000 |
| H | -4.82926100 | -2.55221300 | -0.02403300 |
| H | -4.98765800 | 1.69195100  | -0.47629900 |
| C | 1.89226900  | -0.42507400 | -0.00802400 |
| C | 2.57017200  | -0.81053200 | 1.14819300  |
| C | 1.94410300  | -1.24525500 | -1.13564900 |
| C | 3.28819800  | -1.99434200 | 1.18297300  |
| H | 2.54326400  | -0.16976100 | 2.02256500  |
| C | 2.66284000  | -2.43098600 | -1.11383400 |
| H | 1.42608900  | -0.94547800 | -2.04087600 |
| C | 3.33541200  | -2.80905800 | 0.04914400  |
| H | 3.81624000  | -2.29070500 | 2.08201100  |
| H | 2.70899000  | -3.06217300 | -1.99391500 |
| C | 1.79314200  | 2.13412000  | -0.00943200 |
| C | 1.09631000  | 3.34127800  | 0.11541100  |
| N | 3.12364300  | 2.08150200  | -0.11403000 |
| C | 1.81444800  | 4.52290900  | 0.12002100  |
| H | 0.01774600  | 3.33205900  | 0.20914800  |
| C | 3.80075000  | 3.22821900  | -0.10682400 |
| C | 3.20046400  | 4.47329100  | 0.00511700  |

|     |             |             |             |
|-----|-------------|-------------|-------------|
| H   | 1.30213300  | 5.47460400  | 0.21669100  |
| H   | 4.88014800  | 3.13931600  | -0.19726400 |
| H   | 3.80100600  | 5.37576100  | 0.00549000  |
| H   | -2.35957400 | -2.45667000 | 0.08921200  |
| O   | -6.42684300 | -0.50117000 | -0.33467500 |
| C   | -7.09524100 | -0.30619600 | 0.89698600  |
| H   | -8.16232000 | -0.39450800 | 0.69466000  |
| H   | -6.79937900 | -1.06595000 | 1.63014700  |
| H   | -6.88438100 | 0.68689700  | 1.31122000  |
| C   | 4.07702700  | -4.03629900 | 0.07980500  |
| N   | 4.66954600  | -5.02348900 | 0.10514800  |
| Z11 |             |             |             |
| C   | 1.05953000  | 0.54972100  | 0.00399300  |
| N   | -0.11369800 | -0.00320200 | 0.00415900  |
| N   | -1.22926300 | 0.69245000  | -0.03090500 |
| H   | -1.16829600 | 1.69609700  | -0.18294900 |
| C   | -2.47072700 | 0.04414400  | -0.02257800 |
| C   | -3.62483200 | 0.81098800  | -0.12526200 |
| C   | -2.58442000 | -1.34382400 | 0.09156600  |
| C   | -4.88291500 | 0.21455500  | -0.11569000 |
| C   | -3.83229000 | -1.93663500 | 0.10179900  |
| H   | -1.68851300 | -1.94733800 | 0.16467400  |
| C   | -4.99335300 | -1.16751800 | 0.00005000  |
| H   | -5.75881500 | 0.84601100  | -0.19922200 |
| H   | -3.93108600 | -3.01292000 | 0.18959500  |
| C   | 2.18550700  | -0.42252300 | -0.00368700 |
| C   | 2.15818200  | -1.54234900 | 0.83119800  |
| C   | 3.26451900  | -0.26611900 | -0.87897800 |
| C   | 3.17870100  | -2.47793800 | 0.80004500  |

|     |             |             |             |
|-----|-------------|-------------|-------------|
| H   | 1.32255600  | -1.67295400 | 1.50913100  |
| C   | 4.28995900  | -1.19558700 | -0.92038600 |
| H   | 3.29308900  | 0.58462500  | -1.55191200 |
| C   | 4.25326400  | -2.30719800 | -0.07590800 |
| H   | 3.15172600  | -3.33993600 | 1.45711700  |
| H   | 5.11472800  | -1.07160100 | -1.61303800 |
| C   | 1.34499400  | 2.00115800  | 0.04290000  |
| C   | 2.58951000  | 2.48138500  | 0.48004300  |
| N   | 0.35984800  | 2.84914500  | -0.30035700 |
| C   | 2.81160000  | 3.84489800  | 0.52885600  |
| H   | 3.36232300  | 1.78942000  | 0.78939600  |
| C   | 0.58899800  | 4.16064500  | -0.25185600 |
| C   | 1.79540900  | 4.71309300  | 0.14430800  |
| H   | 3.76682400  | 4.22932100  | 0.87091200  |
| H   | -0.24240700 | 4.79641100  | -0.54365200 |
| H   | 1.92907200  | 5.78824500  | 0.16380600  |
| H   | -3.55070000 | 1.89101000  | -0.21590700 |
| O   | -6.16761300 | -1.85345800 | 0.02299800  |
| C   | -7.36458800 | -1.12318400 | -0.09384600 |
| H   | -7.41565900 | -0.58591400 | -1.04800200 |
| H   | -8.16938100 | -1.85509300 | -0.05285600 |
| H   | -7.48402000 | -0.41046000 | 0.73040500  |
| C   | 5.31551900  | -3.26868500 | -0.10830900 |
| N   | 6.17083700  | -4.04002400 | -0.13304300 |
| E12 |             |             |             |
| C   | -1.38138000 | 0.88109900  | 0.04239100  |
| N   | -0.10593600 | 0.90613600  | 0.15119700  |
| N   | 0.55690800  | -0.25819800 | 0.36736900  |
| H   | 0.08117100  | -1.12372800 | 0.13734900  |



|   |             |             |             |
|---|-------------|-------------|-------------|
| C | 1.93637200  | -0.25721200 | 0.18761900  |
| C | 2.54941100  | -1.34108400 | -0.43789800 |
| C | 2.76638100  | 0.76372900  | 0.65239100  |
| C | 3.92021400  | -1.42023600 | -0.60552100 |
| C | 4.13952100  | 0.70672400  | 0.46784500  |
| C | 4.72357600  | -0.38369300 | -0.15777700 |
| C | -2.18807100 | -0.37142500 | 0.12025300  |
| C | -2.75967600 | -0.92032500 | -1.02666500 |
| C | -2.34436300 | -1.01956200 | 1.34523800  |
| C | -3.47714000 | -2.10304600 | -0.95492900 |
| H | -2.65057500 | -0.41144800 | -1.97746100 |
| C | -3.06793600 | -2.19919200 | 1.42905300  |
| H | -1.90006700 | -0.59365700 | 2.23864900  |
| C | -3.63384700 | -2.74437400 | 0.27577600  |
| H | -3.92215600 | -2.53063300 | -1.84582200 |
| H | -3.19664800 | -2.69835000 | 2.38242200  |
| C | -2.07133800 | 2.17839100  | -0.17821500 |
| C | -1.36940900 | 3.38656900  | -0.13974600 |
| N | -3.38410900 | 2.11116700  | -0.40568900 |
| C | -2.06923200 | 4.56105000  | -0.35160600 |
| H | -0.30446900 | 3.38502900  | 0.05595100  |
| C | -4.04317000 | 3.25023500  | -0.60939200 |
| C | -3.43765500 | 4.49817500  | -0.59368300 |
| H | -1.55558000 | 5.51634400  | -0.32565700 |
| H | -5.10998500 | 3.15306200  | -0.79140300 |
| H | -4.02268300 | 5.39476800  | -0.76348200 |
| F | 1.77977900  | -2.33758600 | -0.89239200 |
| F | 4.46051400  | -2.47067300 | -1.20940000 |
| F | 6.03957500  | -0.43742700 | -0.31967400 |

|     |             |             |             |
|-----|-------------|-------------|-------------|
| F   | 4.90500000  | 1.69402900  | 0.91626200  |
| F   | 2.26571000  | 1.80306000  | 1.31168300  |
| C   | -4.37860300 | -3.96780500 | 0.35449000  |
| N   | -4.97488300 | -4.95083600 | 0.41760900  |
| Z12 |             |             |             |
| C   | -1.35009000 | 0.60071600  | -0.06020400 |
| N   | -0.19836400 | 0.02447900  | -0.05912500 |
| N   | 0.93505300  | 0.73089600  | -0.18262000 |
| H   | 0.89771100  | 1.72253800  | 0.04318300  |
| C   | 2.14313200  | 0.05613800  | -0.09264800 |
| C   | 3.22792900  | 0.68463700  | 0.51844900  |
| C   | 2.36293700  | -1.21533500 | -0.62666900 |
| C   | 4.47091600  | 0.08651300  | 0.61493800  |
| C   | 3.59907700  | -1.83373400 | -0.51391300 |
| C   | 4.65828100  | -1.18796900 | 0.10370200  |
| C   | -2.49736300 | -0.33625000 | 0.08397400  |
| C   | -2.46066800 | -1.57818200 | -0.55466500 |
| C   | -3.59587000 | -0.02147000 | 0.88798500  |
| C   | -3.49781800 | -2.48218400 | -0.40349900 |
| H   | -1.60240800 | -1.83090700 | -1.16588000 |
| C   | -4.63782200 | -0.92055300 | 1.04795500  |
| H   | -3.63188600 | 0.92914200  | 1.40951600  |
| C   | -4.59455300 | -2.15487900 | 0.39760900  |
| H   | -3.46458700 | -3.44230600 | -0.90548600 |
| H   | -5.48186000 | -0.67349100 | 1.68174500  |
| C   | -1.60235600 | 2.05673400  | -0.22638800 |
| C   | -2.80314000 | 2.52123300  | -0.77345000 |
| N   | -0.62053900 | 2.90096100  | 0.12533300  |
| C   | -2.98776600 | 3.88447400  | -0.93276500 |

|   |             |             |             |
|---|-------------|-------------|-------------|
| H | -3.57125300 | 1.82120400  | -1.07742500 |
| C | -0.81159900 | 4.20938200  | -0.02554600 |
| C | -1.97797700 | 4.75412200  | -0.54150900 |
| H | -3.90894200 | 4.26410700  | -1.36171100 |
| H | 0.01378300  | 4.84666800  | 0.27810400  |
| H | -2.08347000 | 5.82746700  | -0.64549500 |
| F | 1.40564700  | -1.85586400 | -1.29111500 |
| F | 3.77798100  | -3.04497500 | -1.02745800 |
| F | 5.84257400  | -1.78067600 | 0.19712100  |
| F | 5.47424800  | 0.72051300  | 1.20957700  |
| F | 3.05489400  | 1.90802300  | 1.03058900  |
| C | -5.67426200 | -3.08498400 | 0.55354600  |
| N | -6.54345200 | -3.83034600 | 0.67835800  |

E13

|   |             |             |             |
|---|-------------|-------------|-------------|
| C | 1.38503300  | 1.17341800  | -0.01618300 |
| N | 0.10268100  | 1.10925500  | -0.01514900 |
| N | -0.50704100 | -0.07858300 | 0.02091400  |
| H | 0.04063800  | -0.92680200 | 0.09706200  |
| C | -1.89129800 | -0.17467400 | 0.01493600  |
| C | -2.47516600 | -1.43981900 | 0.12737100  |
| C | -2.70723300 | 0.95284100  | -0.11036300 |
| C | -3.85212800 | -1.57554600 | 0.11583700  |
| C | -4.08313200 | 0.80560200  | -0.11995300 |
| H | -2.25525400 | 1.93096400  | -0.20574900 |
| C | -4.66539100 | -0.45408400 | -0.01007600 |
| H | -4.29290300 | -2.56167600 | 0.20212100  |
| H | -4.70950500 | 1.68478600  | -0.22183800 |
| C | 2.26297300  | -0.03306300 | -0.01176800 |
| C | 2.98509600  | -0.38026400 | 1.12976800  |

|     |             |             |             |
|-----|-------------|-------------|-------------|
| C   | 2.33783300  | -0.84209200 | -1.14628800 |
| C   | 3.77256300  | -1.52056700 | 1.14513200  |
| H   | 2.93885700  | 0.25385700  | 2.00785900  |
| C   | 3.12447100  | -1.98481800 | -1.14776600 |
| H   | 1.78553500  | -0.56866500 | -2.03926700 |
| C   | 3.82674400  | -2.30491800 | 0.00279800  |
| H   | 4.34113800  | -1.80297700 | 2.02148400  |
| H   | 3.20001600  | -2.61872000 | -2.02155200 |
| C   | 2.01231700  | 2.51640300  | -0.02529400 |
| C   | 1.24761200  | 3.68074000  | 0.09718900  |
| N   | 3.34048100  | 2.53774100  | -0.15897300 |
| C   | 1.89507900  | 4.90252200  | 0.06789400  |
| H   | 0.17380700  | 3.60993800  | 0.21474300  |
| C   | 3.94934300  | 3.72165200  | -0.18390100 |
| C   | 3.27846200  | 4.93116800  | -0.07730800 |
| H   | 1.33054200  | 5.82445600  | 0.16071100  |
| H   | 5.02982700  | 3.69519400  | -0.29664900 |
| H   | 3.82460500  | 5.86703000  | -0.10441700 |
| H   | -1.84896500 | -2.32202500 | 0.22303400  |
| C   | -6.15681200 | -0.58660900 | 0.03134900  |
| F   | -6.76711500 | 0.29846600  | -0.77774200 |
| F   | -6.57102200 | -1.81133000 | -0.33638500 |
| F   | -6.65027400 | -0.37074600 | 1.26948400  |
| C   | 4.69849149  | -3.57439176 | 0.01242539  |
| N   | 5.35513245  | -4.53061875 | 0.01967719  |
| Z13 |             |             |             |
| C   | 1.33500600  | 0.87866900  | 0.01506600  |
| N   | 0.14941800  | 0.36433200  | 0.00374600  |
| N   | -0.94594200 | 1.10737600  | -0.02890100 |

|   |             |             |             |
|---|-------------|-------------|-------------|
| H | -0.84535800 | 2.10878400  | -0.17523100 |
| C | -2.19866300 | 0.50625900  | -0.03749800 |
| C | -3.32679100 | 1.32595500  | -0.11635400 |
| C | -2.35596000 | -0.88104800 | 0.03579700  |
| C | -4.59521200 | 0.76950900  | -0.12145800 |
| C | -3.62631400 | -1.42660600 | 0.02929500  |
| H | -1.48042900 | -1.51463600 | 0.08895400  |
| C | -4.75256100 | -0.60904000 | -0.04882800 |
| H | -5.46266300 | 1.41552400  | -0.18349200 |
| H | -3.74283700 | -2.50373000 | 0.08442200  |
| C | 2.43053300  | -0.12951700 | 0.00988300  |
| C | 2.37542100  | -1.23282200 | 0.86436600  |
| C | 3.50291600  | -0.01548700 | -0.87960900 |
| C | 3.36694900  | -2.20056100 | 0.83993300  |
| H | 1.54453900  | -1.32669200 | 1.55373700  |
| C | 4.49996100  | -0.97617000 | -0.91972300 |
| H | 3.54984400  | 0.82493200  | -1.56396500 |
| C | 4.41766900  | -2.05553400 | -0.05313500 |
| H | 3.33676200  | -3.05448400 | 1.50399800  |
| H | 5.32550500  | -0.90348300 | -1.61546500 |
| C | 1.67372800  | 2.32239800  | 0.06225900  |
| C | 2.93052600  | 2.75154300  | 0.50978600  |
| N | 0.72326000  | 3.20472200  | -0.28867100 |
| C | 3.20250100  | 4.10716300  | 0.56538700  |
| H | 3.67562900  | 2.03072500  | 0.82103200  |
| C | 0.99954200  | 4.50615000  | -0.23594200 |
| C | 2.22290400  | 5.01171400  | 0.17444700  |
| H | 4.16835400  | 4.45512400  | 0.91603400  |
| H | 0.19614500  | 5.17334600  | -0.53483400 |

|   |             |             |             |
|---|-------------|-------------|-------------|
| H | 2.39530500  | 6.08117300  | 0.19857700  |
| H | -3.20948800 | 2.40371000  | -0.17458100 |
| C | -6.11214400 | -1.23731400 | -0.03129000 |
| F | -7.09488700 | -0.34638000 | -0.24089400 |
| F | -6.37526200 | -1.83781800 | 1.14827600  |
| F | -6.23868700 | -2.19239600 | -0.97379500 |
| C | 5.52645820  | -3.12379900 | -0.08470075 |
| N | 6.36165006  | -3.92846615 | -0.10847756 |

E14

|   |             |             |             |
|---|-------------|-------------|-------------|
| C | -0.95220300 | 0.83791000  | 0.00579000  |
| N | 0.33087800  | 0.87237000  | 0.00138500  |
| N | 1.02088300  | -0.27386700 | -0.02696000 |
| H | 0.52796200  | -1.15678500 | -0.08182700 |
| C | 2.40493100  | -0.28027000 | -0.02450000 |
| C | 3.06657400  | -1.51149000 | -0.10692200 |
| C | 3.14965800  | 0.90012100  | 0.06317800  |
| C | 4.44662100  | -1.56310800 | -0.10171500 |
| C | 4.53105500  | 0.84129100  | 0.06681600  |
| H | 2.63849600  | 1.85093700  | 0.13141700  |
| C | 5.19493600  | -0.38563300 | -0.01545100 |
| H | 4.95201000  | -2.51980200 | -0.16702000 |
| H | 5.10607800  | 1.75785700  | 0.13569400  |
| C | -1.73372900 | -0.43375000 | 0.00515700  |
| C | -2.34448100 | -0.88718900 | -1.16317000 |
| C | -1.82568400 | -1.19666000 | 1.16912600  |
| C | -3.04034500 | -2.08516200 | -1.17286600 |
| H | -2.28289200 | -0.29160500 | -2.06740000 |
| C | -2.52380400 | -2.39476500 | 1.17173000  |
| H | -1.35780000 | -0.84207600 | 2.08163200  |

|   |             |             |             |
|---|-------------|-------------|-------------|
| C | -3.13113600 | -2.84221200 | -0.00254400 |
| H | -3.51731200 | -2.43673000 | -2.08039400 |
| H | -2.60406500 | -2.98175000 | 2.07937700  |
| C | -1.68609800 | 2.12562400  | 0.01318400  |
| C | -1.02209900 | 3.34904500  | -0.11497500 |
| N | -3.01113600 | 2.03507900  | 0.14961500  |
| C | -1.77076500 | 4.51228400  | -0.09121000 |
| H | 0.05396700  | 3.36919100  | -0.23308600 |
| C | -3.71795400 | 3.16307800  | 0.17069100  |
| C | -3.15115600 | 4.42423700  | 0.05612600  |
| H | -1.28570800 | 5.47771300  | -0.19016600 |
| H | -4.79197700 | 3.04594700  | 0.28622500  |
| H | -3.77477100 | 5.31057200  | 0.07874400  |
| H | 2.49542800  | -2.43250500 | -0.17657000 |
| C | 6.62459600  | -0.43679500 | -0.00984300 |
| N | 7.77631200  | -0.47804300 | -0.00517900 |
| C | -3.85115800 | -4.08282000 | -0.00786800 |
| N | -4.42636300 | -5.08030700 | -0.01329400 |

Z14

|   |             |             |             |
|---|-------------|-------------|-------------|
| C | -0.88846000 | 0.53518600  | -0.00438300 |
| N | 0.28333600  | -0.00754200 | 0.00081200  |
| N | 1.39662000  | 0.71458800  | 0.02938200  |
| H | 1.31631900  | 1.71675500  | 0.18449700  |
| C | 2.63320100  | 0.08864200  | 0.03096800  |
| C | 2.76288300  | -1.30085500 | -0.05847300 |
| C | 5.03393300  | 0.30862400  | 0.11649900  |
| C | 4.02074100  | -1.87422800 | -0.06006800 |
| H | 1.87438900  | -1.91534300 | -0.11881100 |
| C | 5.16807400  | -1.07978200 | 0.02562800  |

|   |             |             |             |
|---|-------------|-------------|-------------|
| H | 5.91844100  | 0.93168900  | 0.18479900  |
| H | 4.12088300  | -2.95158300 | -0.12904300 |
| C | -2.01170100 | -0.44289700 | 0.00259800  |
| C | -2.00098700 | -1.53604400 | -0.86520300 |
| C | -3.06765400 | -0.30978200 | 0.90779800  |
| C | -3.02084700 | -2.47324100 | -0.83685300 |
| H | -1.18252300 | -1.64566600 | -1.56741400 |
| C | -4.09008400 | -1.24275300 | 0.94840000  |
| H | -3.08149900 | 0.52363200  | 1.60250000  |
| C | -4.07217700 | -2.32882700 | 0.07075700  |
| H | -3.01009000 | -3.31536600 | -1.51940800 |
| H | -4.89825000 | -1.14048600 | 1.66356300  |
| C | -1.19273300 | 1.98774500  | -0.04528900 |
| C | -2.43931600 | 2.44678600  | -0.49075800 |
| N | -0.22280700 | 2.84633200  | 0.31083700  |
| C | -2.68071100 | 3.80865300  | -0.53920300 |
| H | -3.20004400 | 1.74386700  | -0.80519800 |
| C | -0.46983000 | 4.15384500  | 0.26572400  |
| C | -1.68153100 | 4.68866700  | -0.14252900 |
| H | -3.63822400 | 4.18030300  | -0.88832700 |
| H | 0.34807800  | 4.80120200  | 0.56883300  |
| H | -1.83040300 | 5.76177800  | -0.16034500 |
| C | 3.77977600  | 0.88721100  | 0.11838600  |
| H | 3.68227900  | 1.96613000  | 0.18874500  |
| C | 6.46647800  | -1.68026600 | 0.02195000  |
| N | 7.51320600  | -2.16264200 | 0.01893300  |
| C | -5.13297600 | -3.29266400 | 0.10137500  |
| N | -5.98690100 | -4.06516900 | 0.12455900  |

E15



|   |             |             |             |
|---|-------------|-------------|-------------|
| C | 1.34150100  | 0.83632700  | -0.00704300 |
| N | 0.05954200  | 0.89174800  | -0.00314000 |
| N | -0.64952000 | -0.24448400 | 0.02476000  |
| H | -0.17118200 | -1.13528500 | 0.08232300  |
| C | -2.03090900 | -0.22610900 | 0.02288200  |
| C | -2.71506200 | -1.44680100 | 0.10565300  |
| C | -2.75281000 | 0.97003300  | -0.06529000 |
| C | -4.09525000 | -1.47441300 | 0.10095600  |
| C | -4.13464100 | 0.93970200  | -0.06907900 |
| H | -2.22307800 | 1.91039300  | -0.13323700 |
| C | -4.79621900 | -0.27832200 | 0.01408300  |
| H | -4.63379600 | -2.41085100 | 0.16537600  |
| H | -4.70671700 | 1.85590100  | -0.13766500 |
| C | 2.10403600  | -0.44664000 | -0.00728300 |
| C | 2.72000500  | -0.90198600 | 1.15754200  |
| C | 2.17455900  | -1.21630100 | -1.16826500 |
| C | 3.39979800  | -2.10903600 | 1.16672400  |
| H | 2.67561300  | -0.30073400 | 2.05901400  |
| C | 2.85686100  | -2.42350400 | -1.17126800 |
| H | 1.70325100  | -0.85990700 | -2.07831800 |
| C | 3.46945100  | -2.87298500 | -0.00057400 |
| H | 3.88083500  | -2.46234600 | 2.07140600  |
| H | 2.92075100  | -3.01610200 | -2.07656400 |
| C | 2.09475600  | 2.11344300  | -0.01136600 |
| C | 1.44883100  | 3.34538900  | 0.12422800  |
| N | 3.41774000  | 2.00389400  | -0.15255300 |
| C | 2.21418900  | 4.49793700  | 0.10281900  |
| H | 0.37364300  | 3.38110900  | 0.24617700  |
| C | 4.14077900  | 3.12155500  | -0.17131400 |

|   |             |             |             |
|---|-------------|-------------|-------------|
| C | 3.59237300  | 4.39035100  | -0.04955200 |
| H | 1.74319900  | 5.46968000  | 0.20745900  |
| H | 5.21259900  | 2.98965900  | -0.29088800 |
| H | 4.22890600  | 5.26749000  | -0.07049800 |
| H | -2.16079000 | -2.37778200 | 0.17534900  |
| N | -6.25882700 | -0.30403000 | 0.00870900  |
| O | -6.84492100 | 0.75910800  | -0.07887600 |
| O | -6.80722800 | -1.38756700 | 0.09229700  |
| C | 4.17369900  | -4.12260700 | 0.00400400  |
| N | 4.73653300  | -5.12709100 | 0.00873100  |

Z15

|   |             |             |             |
|---|-------------|-------------|-------------|
| C | -1.29184500 | 0.56414600  | 0.00707400  |
| N | -0.09072300 | 0.09126100  | 0.01198000  |
| N | 0.98032000  | 0.87705400  | 0.03229400  |
| H | 0.84233700  | 1.87572300  | 0.16970500  |
| C | 2.24756300  | 0.32224000  | 0.03127100  |
| C | 3.34931000  | 1.18624600  | 0.09339900  |
| C | 2.45169200  | -1.06096600 | -0.03558000 |
| C | 4.63357800  | 0.67949000  | 0.08937300  |
| C | 3.73789500  | -1.56664800 | -0.03990900 |
| H | 1.59766000  | -1.72366500 | -0.07583900 |
| C | 4.81832500  | -0.69553900 | 0.02104400  |
| H | 5.49232600  | 1.33624700  | 0.13700000  |
| H | 3.91369600  | -2.63344900 | -0.09010300 |
| C | -2.35327300 | -0.48114500 | 0.01268900  |
| C | -2.27858100 | -1.56057600 | -0.86873100 |
| C | -3.41041600 | -0.42510400 | 0.92424300  |
| C | -3.23773500 | -2.55987600 | -0.84834000 |
| H | -1.45838000 | -1.61034900 | -1.57562500 |

|     |             |             |             |
|-----|-------------|-------------|-------------|
| C   | -4.37238000 | -1.42085200 | 0.95725200  |
| H   | -3.47217700 | 0.39746700  | 1.62924300  |
| C   | -4.29137400 | -2.49239300 | 0.06538100  |
| H   | -3.17812900 | -3.39112200 | -1.54156300 |
| H   | -5.18162800 | -1.37819900 | 1.67713000  |
| C   | -1.68283000 | 1.99594500  | -0.03935900 |
| C   | -2.96381700 | 2.37689000  | -0.45902000 |
| N   | -0.75667500 | 2.91305500  | 0.28652300  |
| C   | -3.28459400 | 3.72235500  | -0.51540700 |
| H   | -3.69006100 | 1.62824500  | -0.74826200 |
| C   | -1.07936000 | 4.20341900  | 0.23349700  |
| C   | -2.32894200 | 4.66286500  | -0.15262000 |
| H   | -4.27043200 | 4.03349100  | -0.84425800 |
| H   | -0.29393200 | 4.90025900  | 0.51137000  |
| H   | -2.53887100 | 5.72552400  | -0.17904200 |
| H   | 3.19304300  | 2.25904000  | 0.14507800  |
| N   | 6.17790500  | -1.23536000 | 0.01577200  |
| O   | 6.30949500  | -2.44352900 | -0.05089900 |
| O   | 7.10243100  | -0.44540600 | 0.07828300  |
| C   | -5.29023600 | -3.52052100 | 0.08881000  |
| N   | -6.09493400 | -4.34423700 | 0.10710100  |
| E16 |             |             |             |
| C   | -0.28597900 | 0.83687600  | -0.00118300 |
| N   | 0.99296800  | 0.71742900  | -0.00577200 |
| N   | 1.54888500  | -0.49375600 | -0.03943000 |
| H   | 0.99248500  | -1.33866500 | -0.10743200 |
| C   | 2.92462000  | -0.66081000 | -0.03713400 |
| N   | 3.31189000  | -1.93037800 | -0.11975500 |
| C   | 3.81188600  | 0.41743900  | 0.05238400  |

|   |             |             |             |
|---|-------------|-------------|-------------|
| C | 4.62072000  | -2.17864700 | -0.11805400 |
| C | 5.16389100  | 0.13093400  | 0.05138100  |
| H | 3.43614800  | 1.42927100  | 0.12267600  |
| C | 5.59090100  | -1.19252100 | -0.03547400 |
| H | 4.89819400  | -3.22689600 | -0.18809100 |
| H | 5.88635000  | 0.93788700  | 0.11930500  |
| H | 6.64306000  | -1.45039900 | -0.03846700 |
| C | -1.21496700 | -0.33031600 | 0.00088600  |
| C | -1.94102800 | -0.66453500 | -1.14144500 |
| C | -1.33540000 | -1.11963700 | 1.14431500  |
| C | -2.77456900 | -1.77068700 | -1.14599900 |
| H | -1.85813700 | -0.04776500 | -2.02941100 |
| C | -2.17019100 | -2.22647000 | 1.15253800  |
| H | -0.77578900 | -0.86054700 | 2.03713700  |
| C | -2.89105500 | -2.55510100 | 0.00386400  |
| H | -3.33842500 | -2.02981600 | -2.03472800 |
| H | -2.26713500 | -2.83489000 | 2.04425800  |
| C | -0.85119800 | 2.20725500  | 0.01261000  |
| C | -0.03030100 | 3.33639500  | -0.07971100 |
| N | -2.17897500 | 2.29183400  | 0.12309400  |
| C | -0.61878000 | 4.58718100  | -0.04451700 |
| H | 1.04089800  | 3.21494500  | -0.17759300 |
| C | -2.73083300 | 3.50337100  | 0.15323800  |
| C | -2.00181100 | 4.68093900  | 0.07621000  |
| H | -0.00833300 | 5.48182100  | -0.11230800 |
| H | -3.81335100 | 3.52785200  | 0.24649600  |
| H | -2.50345600 | 5.64126900  | 0.10797000  |
| C | -3.75395300 | -3.70083500 | 0.00361300  |
| N | -4.44680000 | -4.62070800 | 0.00258700  |

Z16

|   |             |             |             |
|---|-------------|-------------|-------------|
| C | 0.23667200  | 0.45296800  | -0.01459900 |
| N | -0.77355100 | -0.35284000 | -0.01859200 |
| N | -2.02570500 | 0.07220200  | -0.04319200 |
| H | -2.22923600 | 1.05721000  | -0.19432700 |
| C | -3.07604900 | -0.83577000 | -0.03793000 |
| N | -4.27638000 | -0.27172300 | -0.14071000 |
| C | -2.87395700 | -2.21595300 | 0.07235700  |
| C | -5.33837000 | -1.07582700 | -0.13711200 |
| C | -3.99328200 | -3.02659200 | 0.07374700  |
| H | -1.87201400 | -2.61664200 | 0.14708600  |
| C | -5.25956100 | -2.45562200 | -0.03217200 |
| H | -6.30191100 | -0.58098100 | -0.22472300 |
| H | -3.87905600 | -4.10255100 | 0.15759300  |
| H | -6.15793600 | -3.06133300 | -0.03426500 |
| C | 1.55832900  | -0.23224800 | -0.01859500 |
| C | 2.57641100  | 0.17170100  | -0.88667200 |
| C | 1.78529300  | -1.32522800 | 0.82038200  |
| C | 3.79076700  | -0.49356700 | -0.91718300 |
| H | 2.41098900  | 1.00685800  | -1.55931900 |
| C | 2.99646400  | -1.99628100 | 0.80119900  |
| H | 0.99844500  | -1.64541600 | 1.49346100  |
| C | 4.00758500  | -1.58075000 | -0.06804000 |
| H | 4.56990300  | -0.18065300 | -1.60287700 |
| H | 3.16714400  | -2.83880400 | 1.46175400  |
| C | 0.18356900  | 1.93535400  | 0.03537400  |
| C | 1.27718300  | 2.68038100  | 0.49736700  |
| N | -0.96260100 | 2.53349400  | -0.32450700 |
| C | 1.17593200  | 4.05930900  | 0.56176400  |

|   |             |             |             |
|---|-------------|-------------|-------------|
| H | 2.18520000  | 2.18274200  | 0.81344300  |
| C | -1.04672000 | 3.86004800  | -0.26079000 |
| C | -0.00709100 | 4.67153400  | 0.16667700  |
| H | 2.01117500  | 4.65013400  | 0.92280900  |
| H | -1.99790600 | 4.28799200  | -0.56404700 |
| H | -0.12849000 | 5.74782600  | 0.20042500  |
| C | 5.26546100  | -2.26770100 | -0.08865900 |
| N | 6.27707600  | -2.81840600 | -0.10438400 |

E17

|   |             |             |             |
|---|-------------|-------------|-------------|
| C | 1.43505200  | -0.79526300 | 0.02160400  |
| N | 0.27444600  | -1.34854400 | 0.02861300  |
| N | -0.82019500 | -0.58800100 | 0.01509800  |
| H | -0.77466300 | 0.42296000  | -0.06131600 |
| C | 1.63827000  | 0.68198300  | 0.03290300  |
| C | 2.15731700  | 1.33573200  | -1.08393300 |
| C | 1.27638200  | 1.42762000  | 1.15462200  |
| C | 2.30994700  | 2.71191000  | -1.08594300 |
| H | 2.45090600  | 0.75934000  | -1.95406100 |
| C | 1.42909600  | 2.80528800  | 1.16595300  |
| H | 0.87391400  | 0.92400600  | 2.02731000  |
| C | 1.94504700  | 3.45106500  | 0.04181100  |
| H | 2.71384400  | 3.21829000  | -1.95502100 |
| H | 1.15150600  | 3.38147300  | 2.04104000  |
| C | 2.61932000  | -1.68653000 | 0.00124600  |
| C | 2.48593800  | -3.07060600 | -0.15529400 |
| N | 3.80673000  | -1.09163500 | 0.14034400  |
| C | 3.62789000  | -3.85050100 | -0.15570500 |
| H | 1.50162600  | -3.50489500 | -0.27515200 |
| C | 4.89698200  | -1.85620200 | 0.13660800  |

|     |             |             |             |
|-----|-------------|-------------|-------------|
| C   | 4.86699500  | -3.23572600 | -0.00530100 |
| H   | 3.55471700  | -4.92640100 | -0.27691000 |
| H   | 5.84232500  | -1.33312500 | 0.25457700  |
| H   | 5.78742900  | -3.80839000 | -0.00165500 |
| C   | -2.08112600 | -1.14821600 | 0.03309800  |
| C   | -3.17784400 | -0.23147700 | -0.04248400 |
| C   | -2.32697700 | -2.49842300 | 0.12658500  |
| C   | -4.50199000 | -0.73124500 | -0.02189200 |
| C   | -3.65320600 | -2.97639600 | 0.14504300  |
| H   | -1.49491900 | -3.18826700 | 0.18813000  |
| C   | -3.87940100 | 1.94125600  | -0.20114800 |
| C   | -5.54258900 | 0.22433300  | -0.09967100 |
| C   | -4.72482900 | -2.12680000 | 0.07367000  |
| H   | -3.81750800 | -4.04628000 | 0.22151900  |
| C   | -5.23749800 | 1.55476000  | -0.18902400 |
| H   | -3.61359900 | 2.99304800  | -0.27322200 |
| H   | -6.57541600 | -0.11177300 | -0.08710500 |
| H   | -5.74131200 | -2.50645800 | 0.09063100  |
| H   | -6.01290000 | 2.30979700  | -0.24986900 |
| N   | -2.88532800 | 1.09111900  | -0.13082200 |
| C   | 2.09970400  | 4.87689200  | 0.04406400  |
| N   | 2.22137100  | 6.02219600  | 0.04537000  |
| Z17 |             |             |             |
| C   | 1.10290000  | 0.40025500  | 0.03568400  |
| N   | 0.13677600  | -0.45956500 | 0.03861400  |
| N   | -1.13529800 | -0.09752400 | 0.02777300  |
| H   | -1.39416200 | 0.87483300  | -0.12803500 |
| C   | 2.45952200  | -0.20883600 | -0.00419700 |
| C   | 2.75516100  | -1.32950200 | 0.77582900  |

|   |             |             |             |
|---|-------------|-------------|-------------|
| C | 3.44578000  | 0.29303300  | -0.85854000 |
| C | 3.99962700  | -1.93291600 | 0.70967200  |
| H | 1.99391600  | -1.72530900 | 1.43798700  |
| C | 4.69300300  | -0.30366900 | -0.93505200 |
| H | 3.22871800  | 1.15048200  | -1.48685900 |
| C | 4.97714200  | -1.42071600 | -0.14685900 |
| H | 4.22228200  | -2.79894800 | 1.32276800  |
| H | 5.44614000  | 0.08455100  | -1.61133300 |
| C | 0.96639500  | 1.87626000  | 0.09710900  |
| C | 2.00432000  | 2.67760400  | 0.59262900  |
| N | -0.20264900 | 2.41020400  | -0.28564900 |
| C | 1.82240700  | 4.04754300  | 0.66522300  |
| H | 2.93098800  | 2.22831000  | 0.92716100  |
| C | -0.36529300 | 3.72854100  | -0.21284400 |
| C | 0.61549000  | 4.59455200  | 0.24559800  |
| H | 2.61293800  | 4.68281900  | 1.05085400  |
| H | -1.33308200 | 4.10189900  | -0.53552000 |
| H | 0.43310900  | 5.66212400  | 0.28440900  |
| C | -2.12916500 | -1.05924500 | 0.06362500  |
| C | -3.47581100 | -0.58817700 | -0.04766900 |
| C | -1.88805200 | -2.40695400 | 0.20067900  |
| C | -4.54022800 | -1.52253000 | -0.01310000 |
| C | -2.96034800 | -3.32038100 | 0.23324100  |
| H | -0.86654500 | -2.75728000 | 0.27759900  |
| C | -4.89896700 | 1.18549300  | -0.29844400 |
| C | -5.85044300 | -1.00184100 | -0.13442000 |
| C | -4.26081400 | -2.90315300 | 0.13147100  |
| H | -2.74008100 | -4.37728100 | 0.34259500  |
| C | -6.03412000 | 0.34554600  | -0.27763000 |



|   |             |             |             |
|---|-------------|-------------|-------------|
| H | -5.02235400 | 2.26001400  | -0.41257900 |
| H | -6.69658800 | -1.68266900 | -0.11460100 |
| H | -5.07977600 | -3.61480100 | 0.15679900  |
| H | -7.02468500 | 0.77513200  | -0.37566600 |
| N | -3.66983200 | 0.74807000  | -0.18846400 |
| C | 6.26821000  | -2.03898800 | -0.21725100 |
| N | 7.30655900  | -2.53481200 | -0.27286000 |

E18

|   |             |             |             |
|---|-------------|-------------|-------------|
| C | -1.38793800 | 0.85022900  | -0.02194000 |
| N | -0.10927200 | 0.73983500  | -0.04212100 |
| N | 0.44880000  | -0.47355600 | -0.07208900 |
| H | -0.13800600 | -1.29815200 | -0.09153200 |
| C | 1.82855800  | -0.62499000 | -0.05892900 |
| C | 2.31110100  | -1.98121200 | -0.13214100 |
| C | 2.68802400  | 0.43529600  | 0.01904300  |
| C | 3.63485800  | -2.27351900 | -0.12791600 |
| C | 4.08054900  | 0.15855600  | 0.02400200  |
| H | 2.32855400  | 1.45299600  | 0.07850900  |
| C | 4.56448800  | -1.19592200 | -0.04890500 |
| H | 3.99427600  | -3.29395400 | -0.18449800 |
| C | -2.30273700 | -0.32949200 | -0.00555900 |
| C | -2.88662200 | -0.78959500 | -1.18482000 |
| C | -2.54142400 | -1.00763600 | 1.18936600  |
| C | -3.70103500 | -1.91082100 | -1.17454200 |
| H | -2.70850300 | -0.26025400 | -2.11450900 |
| C | -3.35716100 | -2.12847800 | 1.21154400  |
| H | -2.09248000 | -0.64718500 | 2.10892700  |
| C | -3.93755500 | -2.58327200 | 0.02626500  |
| H | -4.15769500 | -2.26731400 | -2.09060700 |

|   |             |             |             |
|---|-------------|-------------|-------------|
| H | -3.54904700 | -2.64999500 | 2.14216100  |
| C | -1.97234800 | 2.21116000  | -0.00723300 |
| C | -1.16880700 | 3.35338300  | -0.08080900 |
| N | -3.30308100 | 2.26978900  | 0.08424500  |
| C | -1.78048300 | 4.59339000  | -0.05097500 |
| H | -0.09394200 | 3.25192800  | -0.16064700 |
| C | -3.87669400 | 3.47116300  | 0.11097400  |
| C | -3.16656400 | 4.66131700  | 0.04834300  |
| H | -1.18522500 | 5.49895000  | -0.10534900 |
| H | -4.96064600 | 3.47640300  | 0.18826000  |
| H | -3.68531400 | 5.61265000  | 0.07546500  |
| H | 1.58412100  | -2.78643900 | -0.19393900 |
| N | 5.88887100  | -1.29337300 | -0.03256200 |
| N | 5.06082700  | 1.05682200  | 0.09498200  |
| S | 6.46190200  | 0.22553300  | 0.06864200  |
| C | -4.77709100 | -3.74627800 | 0.04094000  |
| N | -5.44803700 | -4.68206500 | 0.05172100  |

Z18

|   |             |             |             |
|---|-------------|-------------|-------------|
| C | -1.43443900 | 0.60953900  | 0.02885900  |
| N | -0.18771000 | 0.27071600  | 0.04759600  |
| N | 0.79345600  | 1.15948100  | 0.07115700  |
| H | 0.55464700  | 2.13815800  | 0.20953600  |
| C | 2.11563000  | 0.72953000  | 0.06684900  |
| C | 3.11019600  | 1.76978800  | 0.13133100  |
| C | 2.46528400  | -0.59041900 | -0.00134200 |
| C | 4.43818500  | 1.49558000  | 0.12713300  |
| C | 3.84889800  | -0.90731000 | -0.00879000 |
| H | 1.71902400  | -1.37153100 | -0.04268000 |
| C | 4.84473600  | 0.13129600  | 0.05494400  |

|   |             |             |             |
|---|-------------|-------------|-------------|
| H | 5.18433600  | 2.27941100  | 0.17569700  |
| C | -2.37326600 | -0.54644300 | 0.02880800  |
| C | -2.12691400 | -1.64434300 | -0.79816400 |
| C | -3.48104700 | -0.57920700 | 0.88009000  |
| C | -2.96647400 | -2.74552800 | -0.78491700 |
| H | -1.26496000 | -1.62794400 | -1.45496000 |
| C | -4.32647700 | -1.67618900 | 0.90342600  |
| H | -3.67608200 | 0.25508800  | 1.54590500  |
| C | -4.07420800 | -2.76422800 | 0.06533100  |
| H | -2.77090100 | -3.59122300 | -1.43428000 |
| H | -5.17659400 | -1.69856700 | 1.57572900  |
| C | -1.97219100 | 1.99086600  | -0.03860000 |
| C | -3.27309900 | 2.23581800  | -0.49845400 |
| N | -1.15531700 | 3.00136200  | 0.30369400  |
| C | -3.73021900 | 3.53988700  | -0.57376200 |
| H | -3.90910500 | 1.41495800  | -0.80394700 |
| C | -1.60856200 | 4.25122600  | 0.23014600  |
| C | -2.88772200 | 4.57680500  | -0.19190800 |
| H | -4.73307300 | 3.74486900  | -0.93301800 |
| H | -0.90602800 | 5.02658900  | 0.52199100  |
| H | -3.20618600 | 5.61173800  | -0.23218300 |
| H | 2.77326400  | 2.80118700  | 0.18395400  |
| N | 4.37636700  | -2.12866800 | -0.07300000 |
| N | 6.09339300  | -0.32189700 | 0.03757500  |
| S | 5.99396500  | -1.94317800 | -0.05217300 |
| C | -4.95235800 | -3.89727300 | 0.07847000  |
| N | -5.66126400 | -4.80503100 | 0.08816900  |

## References

- (1) Mravec, B.; Budzák, Š.; Medved', M.; Pašteka, L. F.; Slavov, C.; Saßmannshausen, T.; Wachtveitl, J.; Kožíšek, J.; Hegedüsová, L.; Filo, J.; Cigáň, M. Design of High-Performance Pyridine/Quinoline Hydrazone Photoswitches. *J. Org. Chem.* **2021**, *86* (17), 11633–11646. <https://doi.org/10.1021/acs.joc.1c01174>.
- (2) Le Bahers, T.; Adamo, C.; Ciofini, I. A Qualitative Index of Spatial Extent in Charge-Transfer Excitations. *J. Chem. Theory Comput.* **2011**, *7* (8), 2498–2506. <https://doi.org/10.1021/ct200308m>.
